# Supplementary material for: Molecular diversity of the acid promoted domino reaction of 3-hydroxy-3-(indol-3-yl)indolin-2-ones and cyclic mercapto-substituted β-enamino esters
Source: Royal Society of Chemistry journal article supplement (doi:10.1039/d1nj00947h), 2021-01-01

**Molecular diversity of acid promoted domino reaction of 3-hydroxy-3-(indol-3-yl)indolin-2-ones and cyclic mercapto-substituted  $\beta$ -enamino esters**

Liu-Na Pan, Qing Wang,\* Jing Sun, Quan-Shun Sun, Chao-Guo Yan\*

**Supporting Information**

|                                                                                                        |             |
|--------------------------------------------------------------------------------------------------------|-------------|
| <b>Figures of single crystal structures</b>                                                            | <b>2-4</b>  |
| <b>General procedure for the Three-component reaction</b>                                              | <b>5</b>    |
| <b>Characterization data, <math>^1\text{H}</math>, <math>^{13}\text{C}</math> NMR and HRMS spectra</b> | <b>5-75</b> |

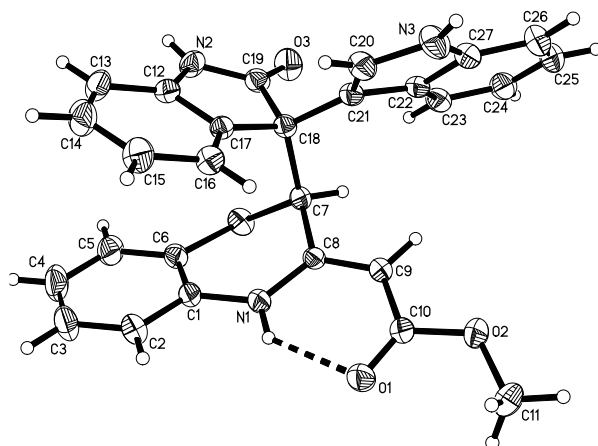

**Fig. s1** ORTEP drawing (30%) of the crystal structure of **3a**

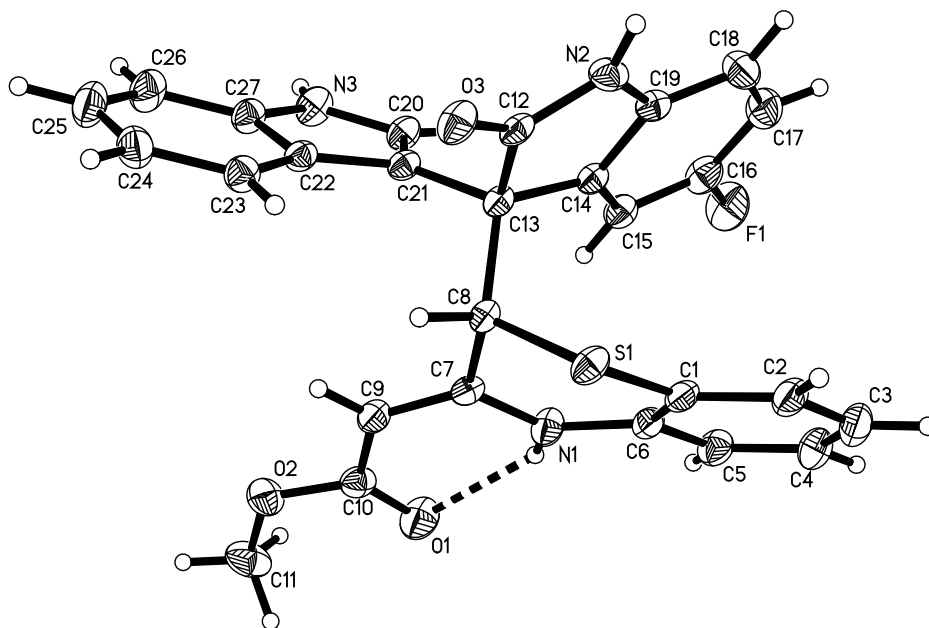

**Fig. s2** ORTEP drawing (30%) of the crystal structure of **3d**

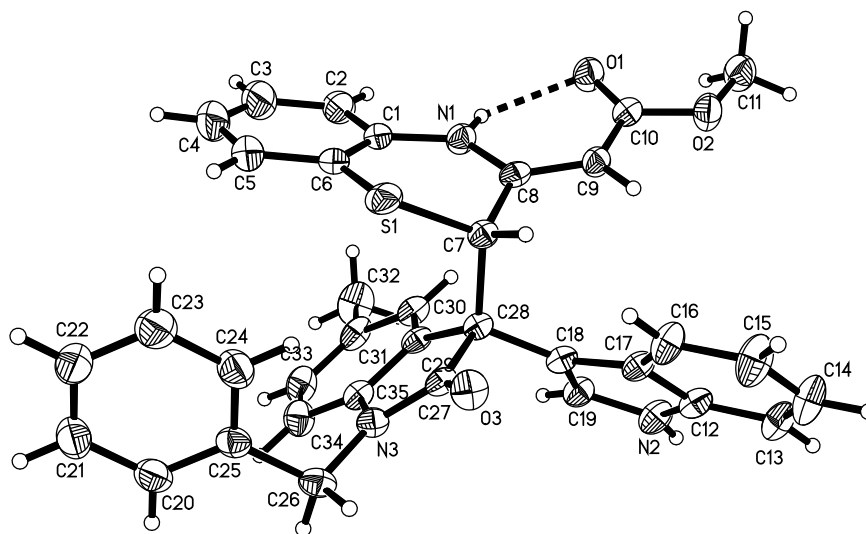

**Fig. s3** ORTEP drawing (30%) of the crystal structure of **3f**

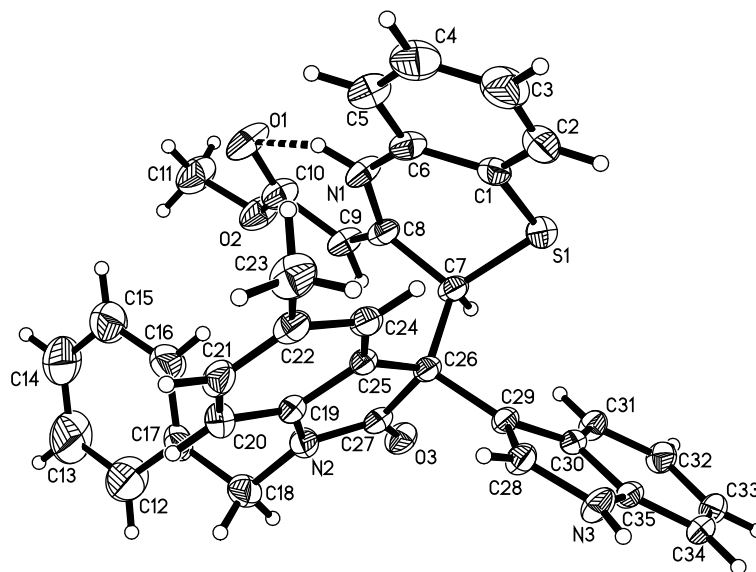

Fig. s4 ORTEP drawing (30%) of the crystal structure of **3f'**

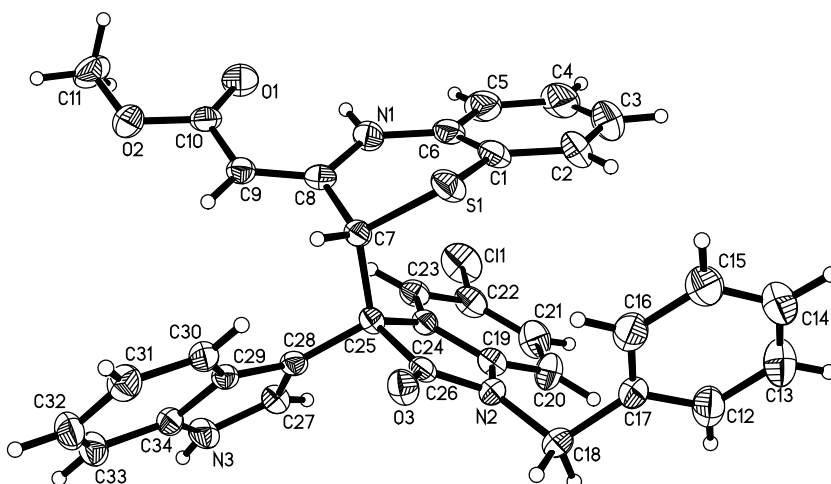

Fig. s5 ORTEP drawing (30%) of the crystal structure of **3g**

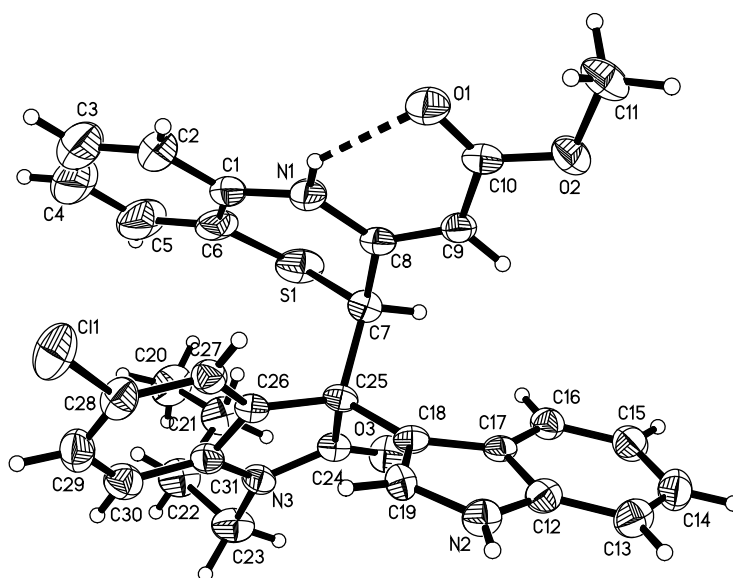

Fig. s6 ORTEP drawing (30%) of the crystal structure of **3h**

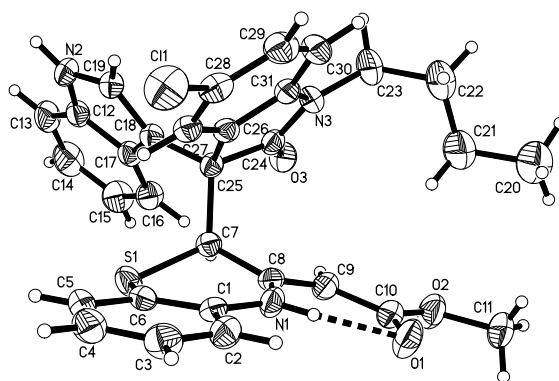

**Fig. s7** ORTEP drawing (30%) of the crystal structure of **3h'**

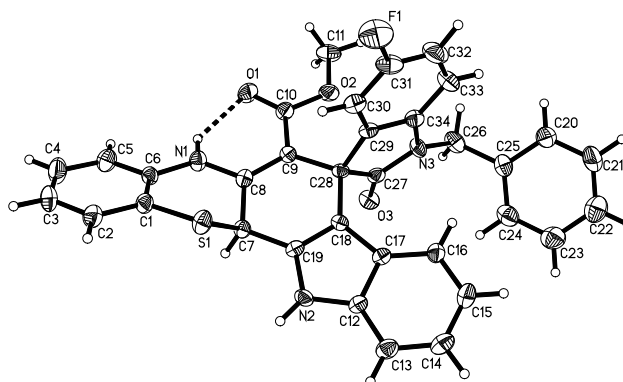

**Fig. s8** ORTEP drawing (30%) of the crystal structure of **4d**

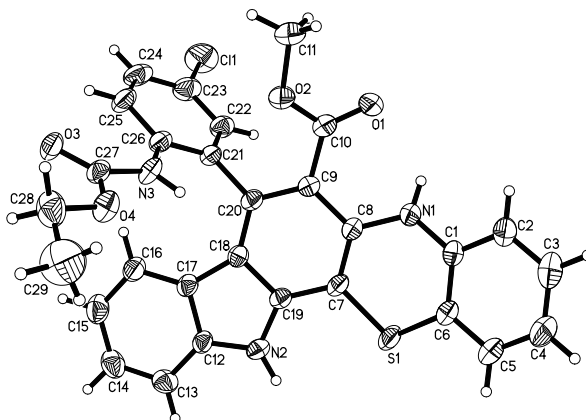

**Fig. s9** ORTEP drawing (30%) of the crystal structure of **5c**

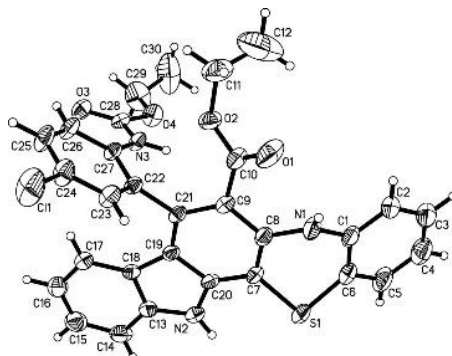

**Fig. s10** ORTEP drawing (30%) of the crystal structure of **5f**



## Experimental section

**1. General procedure for the preparation of 3,3-disubstituted oxindoles:** To a round flask was added cyclic amino ester (1.0 mmol), 3-hydroxy-3-(indol-3-yl)indolin-2-one (1.0 mmol), ethanol (6.0 mL) and acetic acid (2.0 mL). The mixture was stirred at room temperature for twelve hours. After removing the solvent by rotatory evaporation at reduced pressure, the residue was subjected to column chromatography with petroleum ether and methylene dichloride (V/V = 1:3) as eluent to give the pure product **3a-3h** and **3e'-3h'**.

**2. General procedure for the preparation of polycyclic spirooxindoles 4a-4n:** To a tube was added cyclic amino ester (1.0 mmol), 3-hydroxy-3-(indol-3-yl)indolin-2-one (1.0 mmol), ethanol (6.0 mL) and acetic acid (2.0 mL). The mixture was stirred in sealed tube at 120 °C for about twelve hours. After cooling to room temperature, the resulting precipitates were collected by filtration and was washed with little alcohol to give the pure product **4a-4n** for analysis.

**3. General procedure for the preparation of dihydroindolo[3,2-c]phenothiazines 5a-5i:** To a tube was added cyclic amino ester (1.0 mmol), 3-hydroxy-3-(indol-3-yl)indolin-2-one (1.0 mmol), methanol or ethanol (6.0 mL) and acetic acid (2.0 mL). The mixture was stirred in sealed tube at 100 °C for twenty-four hours. After removing the solvent by rotatory evaporation at reduced pressure, the residue was subjected to column chromatography with petroleum ether and methylene dichloride (V/V = 8:1) as eluent to give the pure product **5a-5i**.

**Methyl (Z)-2-(2-(3-(1H-indol-3-yl)-2-oxoindolin-3-yl)-2H-benzo[b][1,4]thiazin-3(4H)-ylidene)acetate (3a):** white solid, 86%, m.p. 220 – 222°C; <sup>1</sup>H NMR (400 MHz, DMSO-*d*<sub>6</sub>) δ: 11.04 (s, 1H, NH), 10.90 (s, 1H, NH), 10.57 (s, 1H, NH), 7.90 (d, *J* = 7.6 Hz, 1H, ArH), 7.37 (d, *J* = 8.0 Hz, 1H, ArH), 7.13 ~ 7.08 (m, 2H, ArH), 7.02 ~ 6.94 (m, 2H, ArH), 6.90 ~ 6.86 (m, 1H, ArH), 6.82 ~ 6.76 (m, 3H, ArH), 6.65 ~ 6.53 (m, 3H, ArH), 4.98 (s, 1H, CH), 4.22 (s, 1H, CH), 3.46 (s, 3H, OCH<sub>3</sub>); <sup>13</sup>C NMR (101 MHz, DMSO-*d*<sub>6</sub>) δ: 177.5, 170.0, 148.9, 142.9, 137.6, 135.8, 129.0, 127.2, 126.9, 126.7, 126.3, 125.6, 122.6, 121.7, 121.2, 119.3, 116.9, 116.6, 112.4, 112.0, 109.5, 87.2, 59.5, 50.9, 43.7; IR (KBr) ν: 3400, 3268, 2971, 2888, 1712, 1609, 1574, 1480, 1441, 1413, 1363, 1285, 1220, 1169, 1105, 1080, 1044, 927, 905, 869, 793 cm<sup>-1</sup>; HRMS (ESI) Calcd. for C<sub>27</sub>H<sub>21</sub>N<sub>3</sub>O<sub>3</sub>S ([M+Na]<sup>+</sup>): 490.1196, Found: 490.1193.

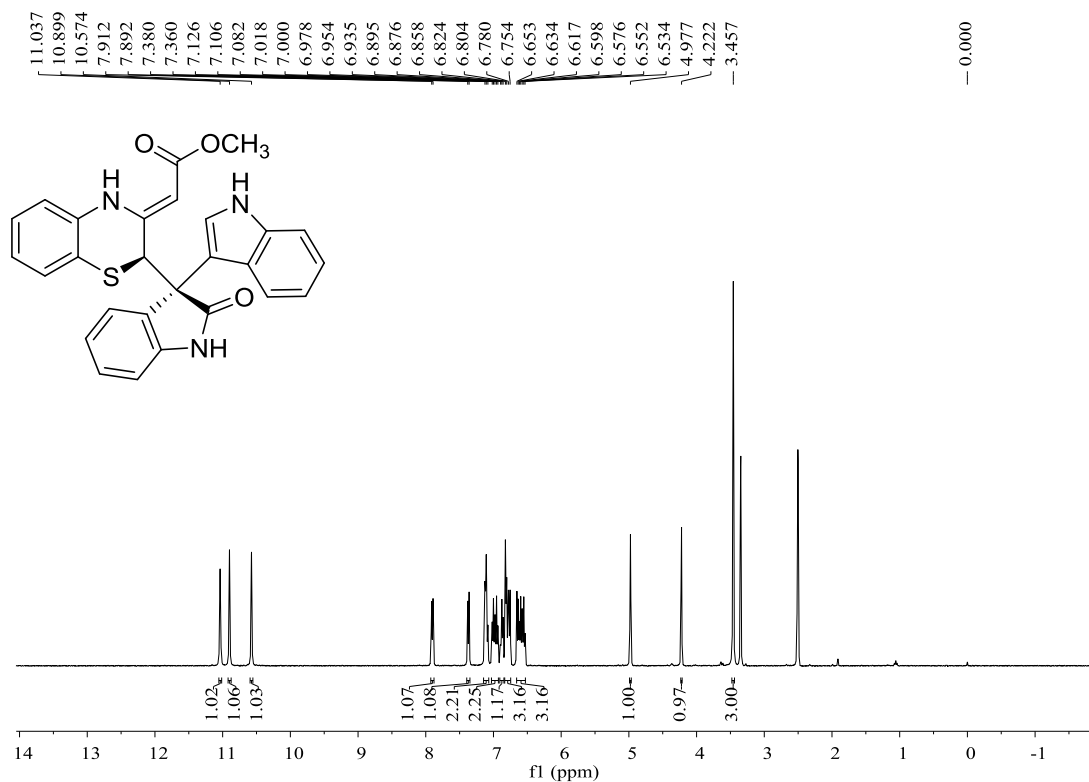

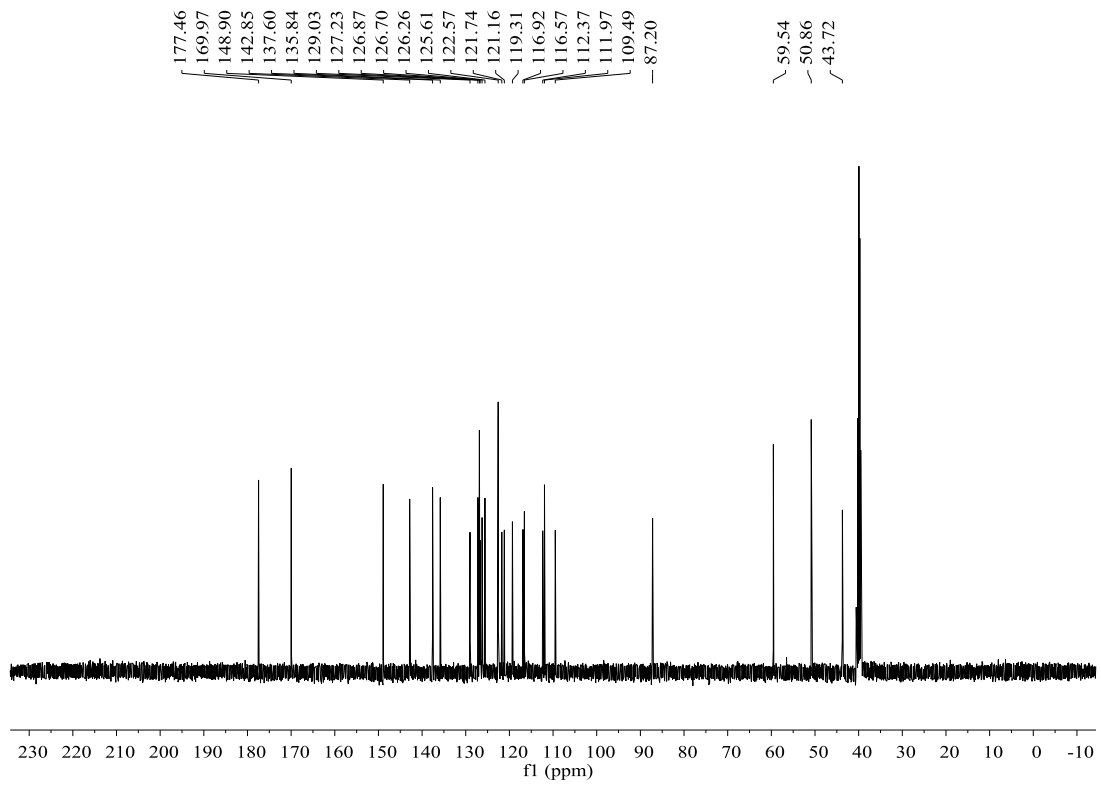

ph1 #46 BT: 0.45 AV: 1 NL: 3.01E+005  
 490.1193  
 13C NMR 125.0000-1500.0000  
 488.8890-490.1193  
 488.8890-490.1193

**Methyl (Z)-2-(2-(3-(1H-indol-3-yl)-5-methyl-2-oxoindolin-3-yl)-2H-benzo[b][1,4]thiazin-3(4H)-ylidene)acetate (3b):** white solid, 81%, m.p. 224 – 226°C; <sup>1</sup>H NMR (400 MHz, DMSO-*d*<sub>6</sub>) δ: 10.98 (s, 1H, NH), 10.91 (s, 1H, NH), 10.46 (s, 1H, NH), 8.04 (d, *J* = 8.4 Hz, 1H, ArH), 7.37 (d, *J* = 8.0 Hz, 1H, ArH), 7.11 (t, *J* = 7.6 Hz, 1H, ArH), 7.04 ~ 7.00 (m, 1H, ArH), 6.93 ~ 6.89 (m, 2H, ArH), 6.87 (d, *J* = 7.6 Hz, 1H, ArH), 6.78 (d, *J* = 2.4 Hz, 1H, ArH), 6.73 ~ 6.71 (m, 2H, ArH), 6.59 ~ 6.53 (m, 2H, ArH), 4.93 (s, 1H, CH), 4.17 (s, 1H, CH), 3.44 (s, 3H, OCH<sub>3</sub>), 2.01 (s, 3H, CH<sub>3</sub>); <sup>13</sup>C NMR (101 MHz, DMSO-*d*<sub>6</sub>) δ: 13C NMR (101 MHz, dmso) δ 177.7, 170.0, 149.0, 140.1, 137.6, 135.9, 130.0, 129.2, 127.5, 126.9, 126.9, 126.8, 126.3, 125.6, 122.7, 122.6, 121.9, 119.4, 116.6, 116.3, 112.4, 111.8, 109.4, 87.1, 59.8, 50.9, 43.7, 21.0; IR (KBr) ν: 3380, 3267, 2943, 2858, 1707, 1609, 1574, 1490, 1438, 1365, 1285, 1219, 1167, 1106, 1080, 1042, 959, 927, 880, 789 cm<sup>-1</sup>; HRMS (ESI) Calcd. for C<sub>28</sub>H<sub>23</sub>N<sub>3</sub>O<sub>3</sub>S ([M+Na]<sup>+</sup>): 504.1352, Found: 504.1344.

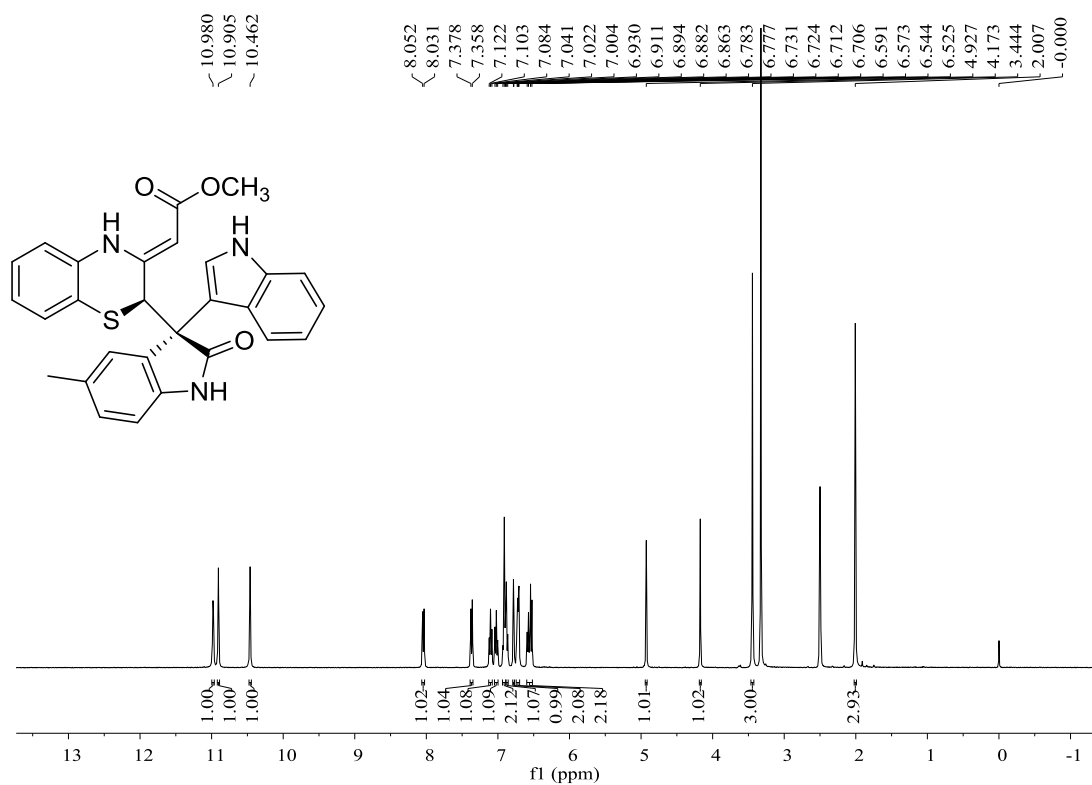

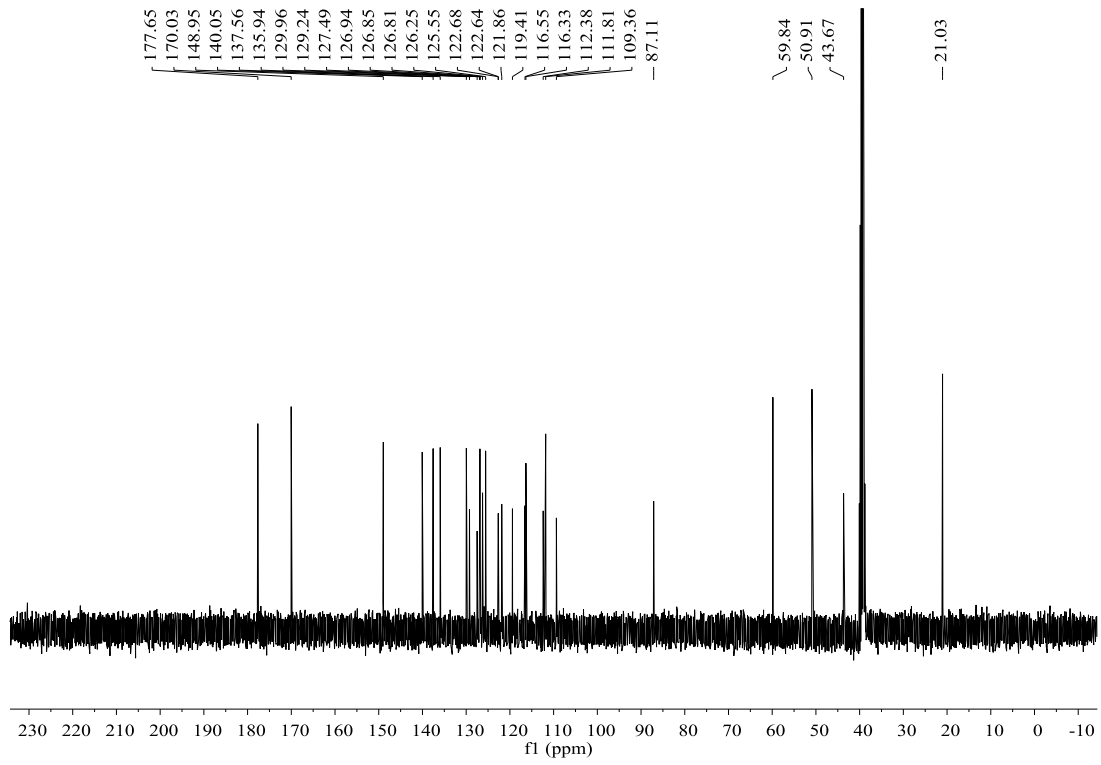

pH2 #57 RT: 0.55 min; 1 NL: 6.58E+005  
 FTIRMS: +0.6015500 [100.0000-1500.0000]  
 49030036020300000300000000

**Methyl (Z)-2-(2-(5-chloro-3-(1H-indol-3-yl)-2-oxoindolin-3-yl)-2H-benzo[b][1,4]thiazin-3(4H)-ylidene)acetate (3c):** white solid, 75%, m.p. 211 – 213°C; <sup>1</sup>H NMR (400 MHz, DMSO-*d*<sub>6</sub>) δ: 11.06 (d, *J* = 2.0 Hz, 1H, NH), 10.91 (s, 1H, NH), 10.74 (s, 1H, NH), 7.94 (d, *J* = 8.0 Hz, 1H, ArH), 7.38 (d, *J* = 8.0 Hz, 1H, ArH), 7.13 ~ 7.10 (m, 1H, ArH), 7.04 ~ 6.93 (m, 4H, ArH), 6.87 ~ 6.85 (m, 2H, ArH), 6.79 ~ 6.78 (m, 1H, ArH), 6.66 ~ 6.61 (m, 2H, ArH), 4.99 (s, 1H, CH), 4.21 (s, 1H, CH), 3.46 (s, 3H, OCH<sub>3</sub>); <sup>13</sup>C NMR (101 MHz, DMSO-*d*<sub>6</sub>) δ: 177.2, 169.9, 148.4, 141.8, 137.6, 135.9, 129.0, 129.0, 127.2, 127.1, 126.8, 126.2, 125.5, 125.4, 122.7, 122.5, 121.8, 119.4, 116.8, 116.2, 112.5, 111.0, 110.9, 87.6, 60.0, 50.9, 43.4; IR (KBr) ν: 3343, 3269, 3059, 2947, 1707, 1653, 1616, 1579, 1477, 1433, 1282, 1221, 1160, 1077, 1030, 988, 881, 788 cm<sup>-1</sup>; HRMS (ESI) Calcd. for C<sub>27</sub>H<sub>20</sub>ClN<sub>3</sub>O<sub>3</sub>S ([M+Na]<sup>+</sup>): 524.0806, Found: 524.0799.

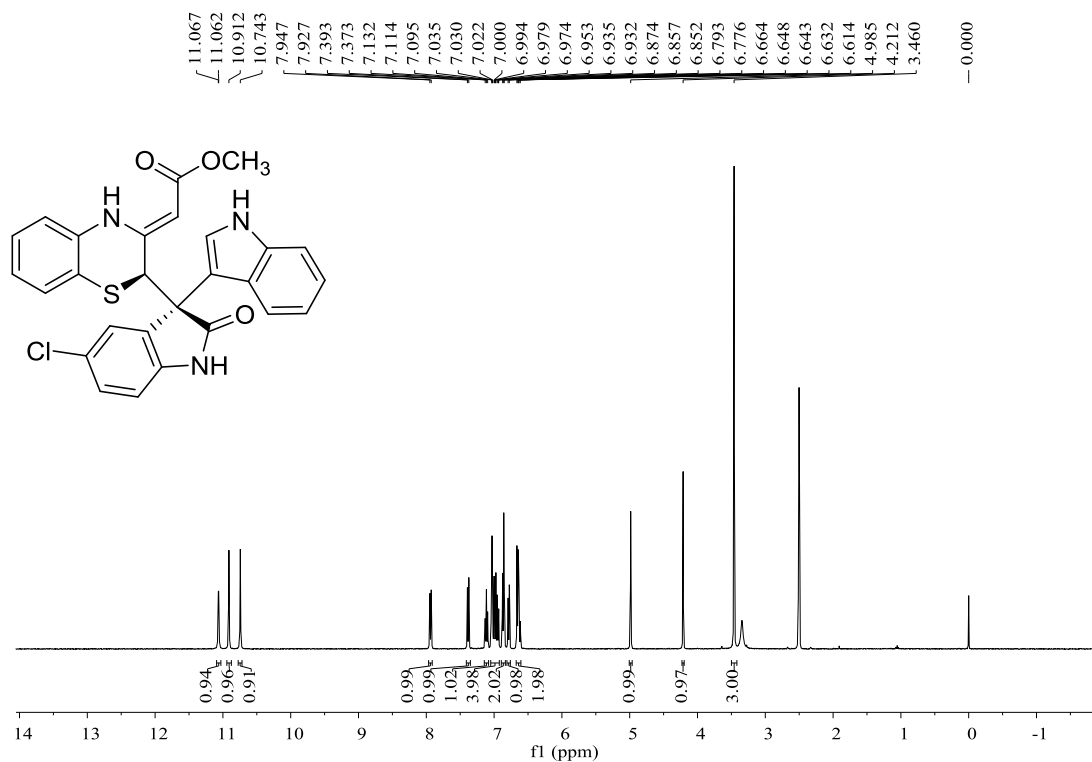



**Methyl (Z)-2-(2-(5-fluoro-3-(1H-indol-3-yl)-2-oxoindolin-3-yl)-2H-benzo[b][1,4]thiazin-3(4H)-ylidene)acetate (3d):** white solid, 73%, m.p. 212 – 214°C; <sup>1</sup>H NMR (400 MHz, DMSO-*d*<sub>6</sub>) δ: 11.06 (d, *J* = 2.0 Hz, 1H, NH), 10.89 (s, 1H, NH), 10.62 (s, 1H, NH), 7.94 (d, *J* = 8.4 Hz, 1H, ArH), 7.37 (d, *J* = 8.4 Hz, 1H, ArH), 7.13 ~ 7.09 (m, 1H, ArH), 7.04 ~ 7.00 (m, 1H, ArH), 6.95 ~ 6.91 (m, 1H, ArH), 6.89 ~ 6.85 (m, 3H, ArH), 6.80 ~ 6.75 (m, 2H, ArH), 6.65 ~ 6.61 (m, 2H, ArH), 4.98 (s, 1H, CH), 4.22 (s, 1H, CH), 3.46 (s, 3H, OCH<sub>3</sub>); <sup>13</sup>C NMR (101 MHz, DMSO-*d*<sub>6</sub>) δ: 177.5, 169.9, 157.5 (d, *J* = 237.4 Hz), 148.4, 139.0, 137.6, 135.9, 128.7 (d, *J* = 9.1 Hz), 127.1, 127.1, 126.2, 125.4, 122.7, 122.5, 121.9, 119.4, 116.7, 116.3, 115.5 (d, *J* = 23.2 Hz), 114.4 (d, *J* = 25.3 Hz), 112.4, 111.2, 110.3 (d, *J* = 9.1 Hz), 87.6, 60.2, 50.9, 43.5; IR (KBr) ν: 3344, 3262, 2946, 2873, 1711, 1657, 1617, 1579, 1485, 1445, 1367, 1284, 1221, 1188, 1161, 1081, 1036, 956, 927, 893, 814, 788 cm<sup>-1</sup>; HRMS (ESI) Calcd. for C<sub>27</sub>H<sub>20</sub>FN<sub>3</sub>O<sub>3</sub>S ([M+Na]<sup>+</sup>): 508.1102, Found: 508.1098.

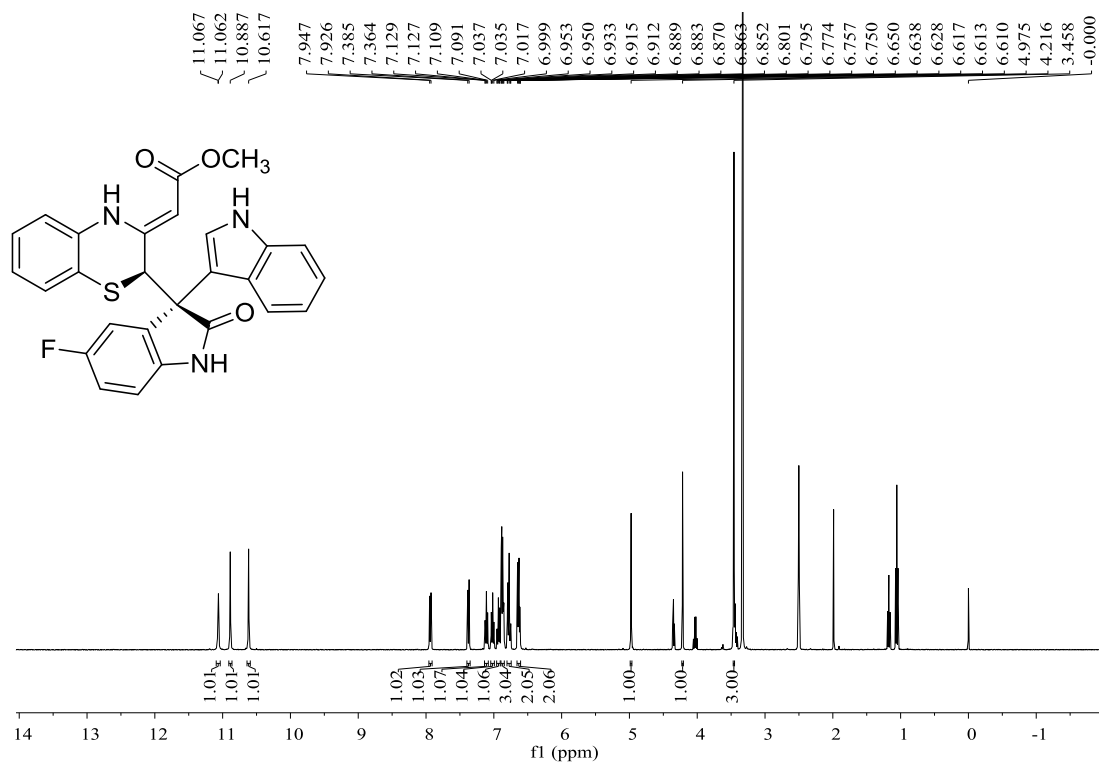



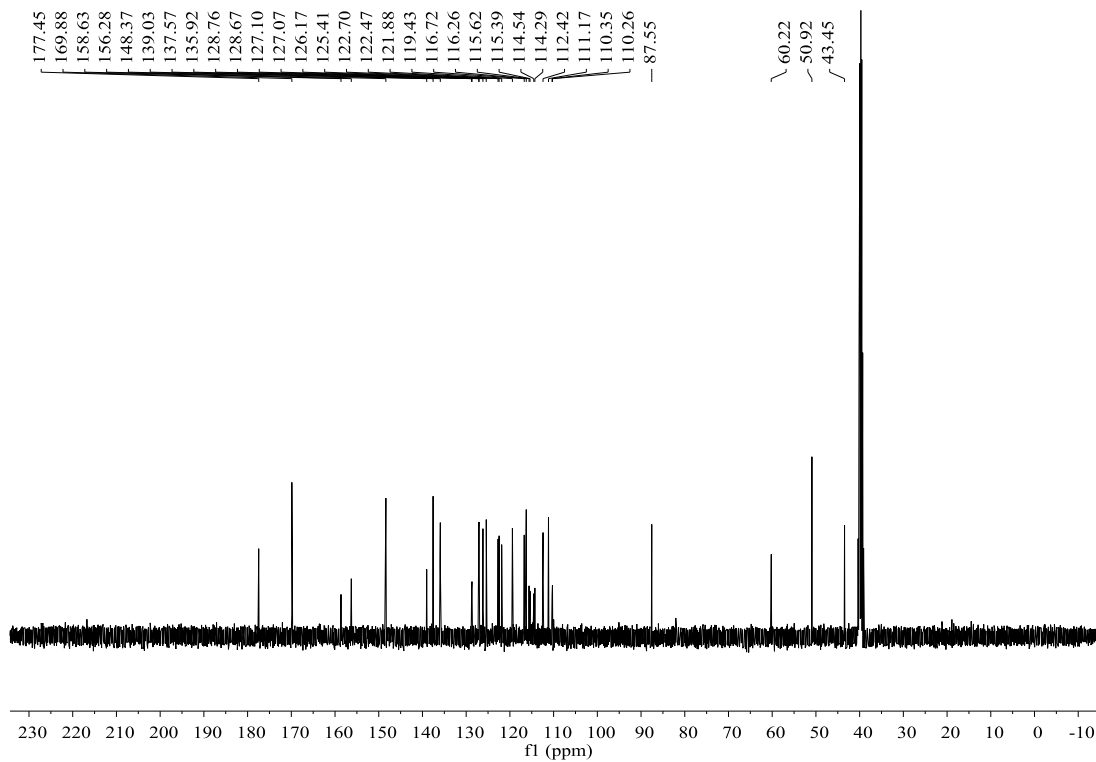

ph4 #110 RT: 1.03 AV: 1 NL: 3.63E+004  
 FTIR: 1500-4000 (100.0000-1500.0000)  
 500.0000-1500.0000

**Methyl (Z)-2-(2-(1-benzyl-3-(1H-indol-3-yl)-2-oxoindolin-3-yl)-2H-benzo[b][1,4]thiazin-3(4H)-ylidene)acetate (3e):** white solid, 48%, m.p. 216 – 218°C; <sup>1</sup>H NMR (400 MHz, DMSO-*d*<sub>6</sub>) δ: 11.08 (d, *J* = 2.0 Hz, 1H, NH), 10.90 (s, 1H, NH), 7.93 (d, *J* = 8.0 Hz, 1H, ArH), 7.43 ~ 7.34 (m, 5H, ArH), 7.30 ~ 7.27 (m, 1H, ArH), 7.19 (d, *J* = 7.2 Hz, 1H, ArH), 7.14 ~ 7.10 (m, 1H, ArH), 7.03 ~ 6.99 (m, 1H, ArH), 6.98 ~ 6.94 (m, 1H, ArH), 6.87 ~ 6.81 (m, 2H, ArH), 6.76 (d, *J* = 7.2 Hz, 1H, ArH), 6.67 ~ 6.60 (m, 2H, ArH), 6.54 ~ 6.47 (m, 2H, ArH), 5.12 (s, 1H, CH), 5.00 (d, *J* = 16.0 Hz, 1H, CH), 4.71 (d, *J* = 16.0 Hz, 1H, CH), 4.23 (s, 1H, CH), 3.47 (s, 3H, OCH<sub>3</sub>); <sup>13</sup>C NMR (101 MHz, DMSO-*d*<sub>6</sub>) δ: 175.9, 169.9, 148.7, 143.3, 137.6, 136.7, 135.8, 129.1, 128.9, 127.9, 127.8, 126.9, 126.7, 126.6, 126.5, 126.38, 125.5, 122.6, 122.5, 122.0, 121.8, 119.4, 116.9, 116.1, 112.5, 111.7, 110.0, 109.2, 87.4, 59.2, 50.9, 43.7, 43.5; IR (KBr) ν: 3319, 3181, 3046, 2949, 2857, 1694, 1655, 1614, 1579, 1488, 1461, 1434, 1370, 1341, 1287, 1223, 1164, 1112, 1080, 1034, 1010, 927, 896, 850, 789 cm<sup>-1</sup>; HRMS (ESI) Calcd. for C<sub>34</sub>H<sub>27</sub>N<sub>3</sub>O<sub>3</sub>S ([M+Na]<sup>+</sup>): 580.1665, Found: 580.1662.

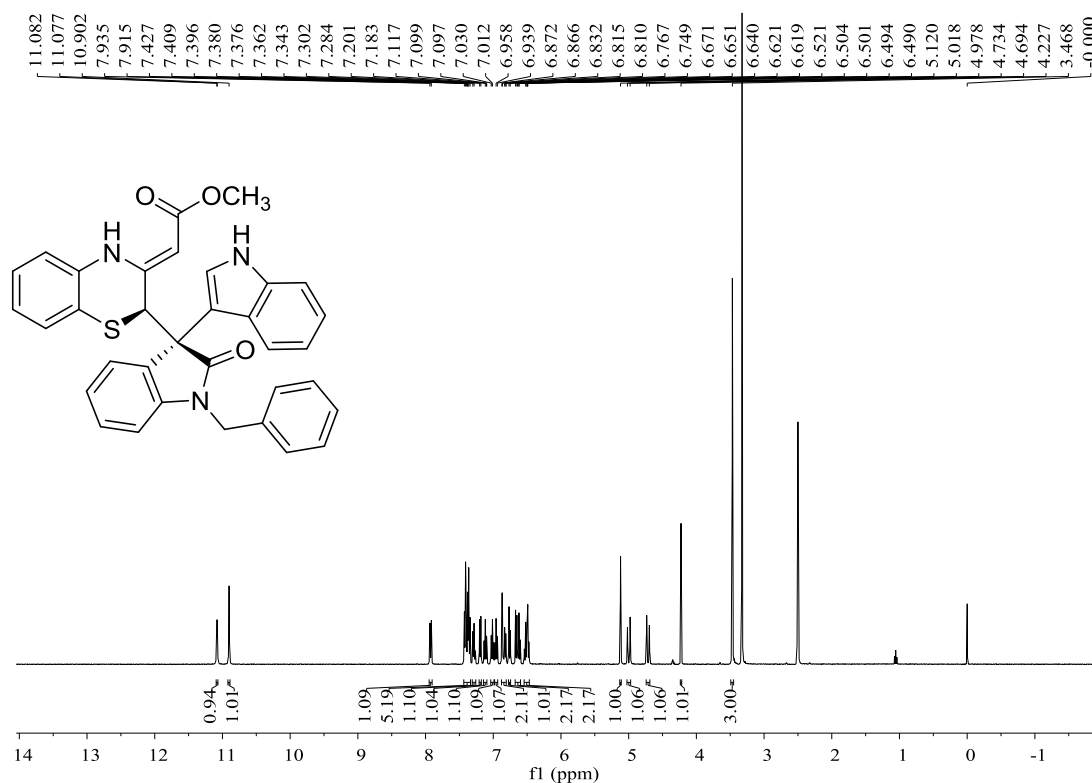



**Methyl (Z)-2-(2-(1-benzyl-3-(1H-indol-3-yl)-2-oxoindolin-3-yl)-2H-benzo[b][1,4]thiazin-3(4H)-ylidene)acetate (3e')**: white solid, 40%, m.p. 200 – 202°C; <sup>1</sup>H NMR (400 MHz, DMSO-*d*<sub>6</sub>) δ: 11.21 (d, *J* = 2.0 Hz, 1H, NH), 10.48 (s, 1H, NH), 7.38 (d, *J* = 8.0 Hz, 1H, ArH), 7.26 ~ 7.24 (m, 3H, ArH), 7.21 ~ 7.19 (m, 2H, ArH), 7.14 (d, *J* = 2.4 Hz, 1H, ArH), 7.12 ~ 7.09 (m, 2H, ArH), 7.08 ~ 7.03 (m, 2H, ArH), 6.98 ~ 6.94 (m, 1H, ArH), 6.90 ~ 6.86 (m, 1H, ArH), 6.85 ~ 6.81 (m, 1H, ArH), 6.77 (d, *J* = 8.0 Hz, 1H, ArH), 6.59 ~ 6.55 (m, 2H, ArH), 6.40 ~ 6.36 (m, 1H, ArH), 5.24 (s, 1H, CH), 4.97 (s, 1H, CH), 4.95 (d, *J* = 16.0 Hz, 1H, CH), 4.63 (d, *J* = 16.0 Hz, 1H, CH), 3.61 (s, 3H, OCH<sub>3</sub>); <sup>13</sup>C NMR (101 MHz, DMSO-*d*<sub>6</sub>) δ: 176.6, 170.3, 147.9, 143.4, 137.5, 136.4, 135.6, 129.1, 128.9, 127.7, 127.7, 127.4, 127.0, 126.9, 126.9, 126.5, 125.6, 123.2, 121.7, 121.2, 121.0, 119.3, 117.8, 117.2, 112.4, 111.3, 109.3, 87.3, 59.7, 51.1, 45.0, 43.5; IR (KBr) ν: 3362, 3205, 3059, 2944, 2839, 1688, 1662, 1618, 1581, 1488, 1460, 1433, 1366, 1288, 1228, 1163, 1109, 1081, 1040, 935, 898, 844, 794 cm<sup>-1</sup>; HRMS (ESI) Calcd. for C<sub>34</sub>H<sub>27</sub>N<sub>3</sub>O<sub>3</sub>S ([M+Na]<sup>+</sup>): 580.1665, Found: 580.1659.

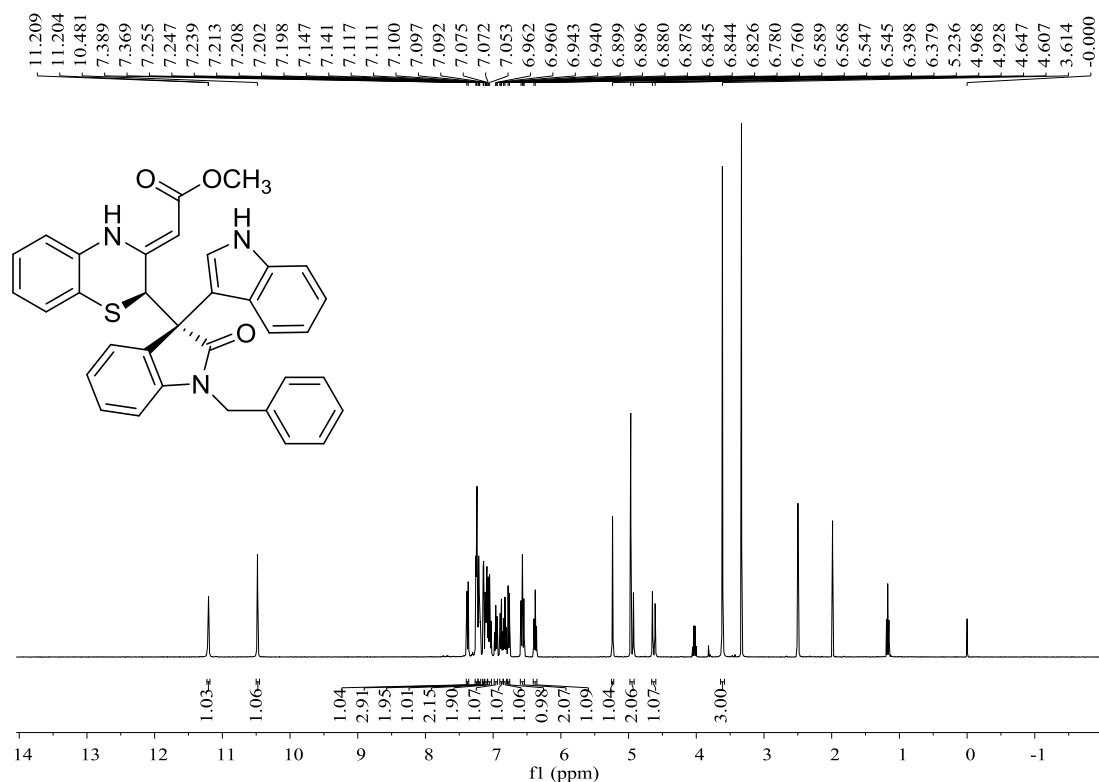

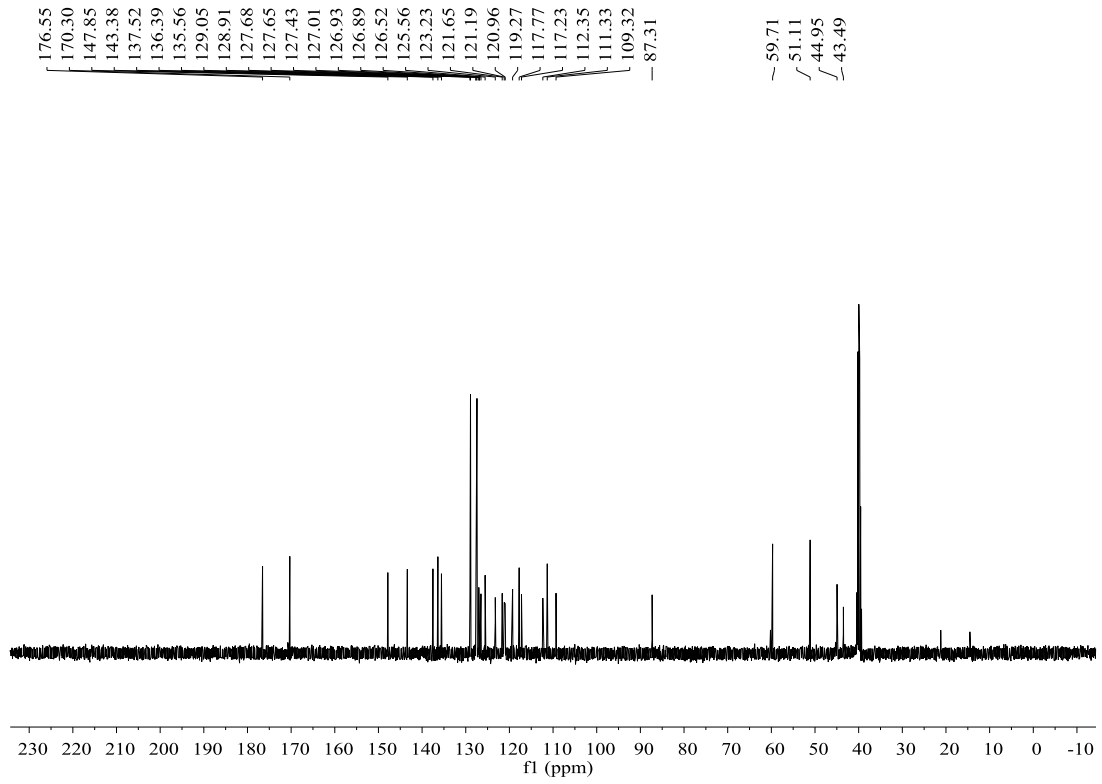

pH6 #53 RT: 0.67 AV: 1 NL: 2.25E+005  
 580.1659  
 1. ETMS (500000.0000-1500.0000)  
 578.1659  
 576.1659  
 574.1659  
 572.1659  
 570.1659  
 568.1659  
 566.1659  
 564.1659  
 562.1659  
 560.1659  
 558.1659  
 556.1659  
 554.1659  
 552.1659  
 550.1659  
 548.1659  
 546.1659  
 544.1659  
 542.1659  
 540.1659  
 538.1659  
 536.1659  
 534.1659  
 532.1659  
 530.1659  
 528.1659  
 526.1659  
 524.1659  
 522.1659  
 520.1659  
 518.1659  
 516.1659  
 514.1659  
 512.1659  
 510.1659  
 508.1659  
 506.1659  
 504.1659  
 502.1659  
 500.1659  
 498.1659  
 496.1659  
 494.1659  
 492.1659  
 490.1659  
 488.1659  
 486.1659  
 484.1659  
 482.1659  
 480.1659  
 478.1659  
 476.1659  
 474.1659  
 472.1659  
 470.1659  
 468.1659  
 466.1659  
 464.1659  
 462.1659  
 460.1659  
 458.1659  
 456.1659  
 454.1659  
 452.1659  
 450.1659  
 448.1659  
 446.1659  
 444.1659  
 442.1659  
 440.1659  
 438.1659  
 436.1659  
 434.1659  
 432.1659  
 430.1659  
 428.1659  
 426.1659  
 424.1659  
 422.1659  
 420.1659  
 418.1659  
 416.1659  
 414.1659  
 412.1659  
 410.1659  
 408.1659  
 406.1659  
 404.1659  
 402.1659  
 400.1659  
 398.1659  
 396.1659  
 394.1659  
 392.1659  
 390.1659  
 388.1659  
 386.1659  
 384.1659  
 382.1659  
 380.1659  
 378.1659  
 376.1659  
 374.1659  
 372.1659  
 370.1659  
 368.1659  
 366.1659  
 364.1659  
 362.1659  
 360.1659  
 358.1659  
 356.1659  
 354.1659  
 352.1659  
 350.1659  
 348.1659  
 346.1659  
 344.1659  
 342.1659  
 340.1659  
 338.1659  
 336.1659  
 334.1659  
 332.1659  
 330.1659  
 328.1659  
 326.1659  
 324.1659  
 322.1659  
 320.1659  
 318.1659  
 316.1659  
 314.1659  
 312.1659  
 310.1659  
 308.1659  
 306.1659  
 304.1659  
 302.1659  
 300.1659  
 298.1659  
 296.1659  
 294.1659  
 292.1659  
 290.1659  
 288.1659  
 286.1659  
 284.1659  
 282.1659  
 280.1659  
 278.1659  
 276.1659  
 274.1659  
 272.1659  
 270.1659  
 268.1659  
 266.1659  
 264.1659  
 262.1659  
 260.1659  
 258.1659  
 256.1659  
 254.1659  
 252.1659  
 250.1659  
 248.1659  
 246.1659  
 244.1659  
 242.1659  
 240.1659  
 238.1659  
 236.1659  
 234.1659  
 232.1659  
 230.1659  
 228.1659  
 226.1659  
 224.1659  
 222.1659  
 220.1659  
 218.1659  
 216.1659  
 214.1659  
 212.1659  
 210.1659  
 208.1659  
 206.1659  
 204.1659  
 202.1659  
 200.1659  
 198.1659  
 196.1659  
 194.1659  
 192.1659  
 190.1659  
 188.1659  
 186.1659  
 184.1659  
 182.1659  
 180.1659  
 178.1659  
 176.1659  
 174.1659  
 172.1659  
 170.1659  
 168.1659  
 166.1659  
 164.1659  
 162.1659  
 160.1659  
 158.1659  
 156.1659  
 154.1659  
 152.1659  
 150.1659  
 148.1659  
 146.1659  
 144.1659  
 142.1659  
 140.1659  
 138.1659  
 136.1659  
 134.1659  
 132.1659  
 130.1659  
 128.1659  
 126.1659  
 124.1659  
 122.1659  
 120.1659  
 118.1659  
 116.1659  
 114.1659  
 112.1659  
 110.1659  
 108.1659  
 106.1659  
 104.1659  
 102.1659  
 100.1659  
 98.1659  
 96.1659  
 94.1659  
 92.1659  
 90.1659  
 88.1659  
 86.1659  
 84.1659  
 82.1659  
 80.1659  
 78.1659  
 76.1659  
 74.1659  
 72.1659  
 70.1659  
 68.1659  
 66.1659  
 64.1659  
 62.1659  
 60.1659  
 58.1659  
 56.1659  
 54.1659  
 52.1659  
 50.1659  
 48.1659  
 46.1659  
 44.1659  
 42.1659  
 40.1659  
 38.1659  
 36.1659  
 34.1659  
 32.1659  
 30.1659  
 28.1659  
 26.1659  
 24.1659  
 22.1659  
 20.1659  
 18.1659  
 16.1659  
 14.1659  
 12.1659  
 10.1659  
 8.1659  
 6.1659  
 4.1659  
 2.1659  
 0.1659  
 -1.1659  
 -3.1659  
 -5.1659  
 -7.1659  
 -9.1659

Methyl

(Z)-2-(2-(1-benzyl-3-(1H-indol-3-yl)-5-methyl-2-oxindolin-3-yl)-2H-

benzo[b][1,4]thiazin-3(4H)-ylidene)acetate (**3f**): white solid, 45%, m.p. 209 – 211°C; <sup>1</sup>H NMR (400 MHz, DMSO-*d*<sub>6</sub>) δ: 11.03 (d, *J* = 2.0 Hz, 1H, NH), 10.92 (s, 1H, NH), 8.08 (d, *J* = 8.0 Hz, 1H, ArH), 7.42 ~ 7.34 (m, 5H, ArH), 7.29 ~ 7.26 (m, 1H, ArH), 7.14 ~ 7.11 (m, 1H, ArH), 7.06 ~ 7.02 (m, 1H, ArH), 6.98 (s, 1H, ArH), 6.90 ~ 6.85 (m, 2H, ArH), 6.83 (d, *J* = 2.4 Hz, 1H, ArH), 6.73 ~ 6.71 (m, 1H, ArH), 6.54 ~ 6.46 (m, 3H, ArH), 5.08 (s, 1H, CH), 4.99 (d, *J* = 16.0 Hz, 1H, CH), 4.69 (d, *J* = 15.6 Hz, 1H, CH), 4.19 (s, 1H, CH), 3.46 (s, 3H, OCH<sub>3</sub>), 2.02 (s, 3H, CH<sub>3</sub>); <sup>13</sup>C NMR (101 MHz, DMSO-*d*<sub>6</sub>) δ: 175.9, 169.9, 148.8, 140.9, 137.7, 136.7, 136.1, 130.7, 129.2, 128.8, 127.8, 127.8, 127.5, 126.8, 126.8, 126.5, 126.2, 125.6, 122.7, 122.5, 121.8, 119.4, 116.6, 116.1, 112.4, 111.7, 109.0, 87.4, 59.5, 50.9, 43.9, 43.5, 21.1; IR (KBr) ν: 3318, 3191, 3040, 2944, 2859, 1691, 1655, 1613, 1577, 1492, 1435, 1373, 1340, 1284, 1218, 1160, 1080, 1031, 971, 925, 874, 846, 812, 788 cm<sup>-1</sup>; HRMS (ESI) Calcd. for C<sub>35</sub>H<sub>29</sub>N<sub>3</sub>O<sub>3</sub>S ([M+Na]<sup>+</sup>): 594.1822, Found: 594.1818.

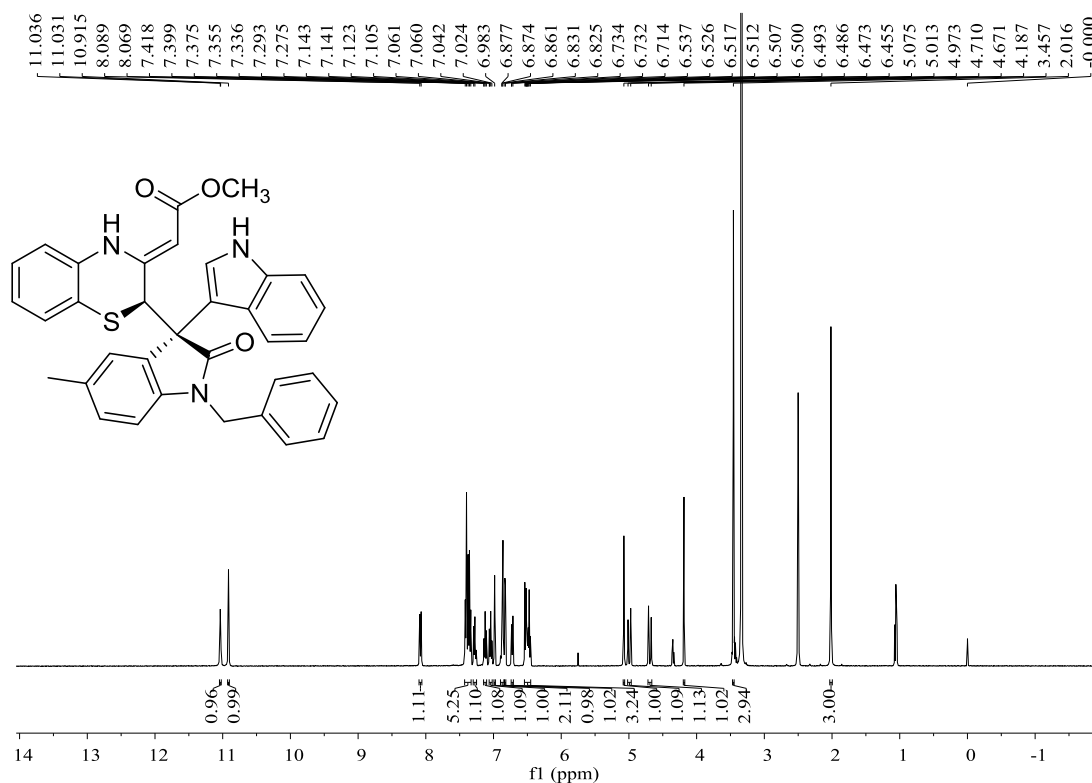

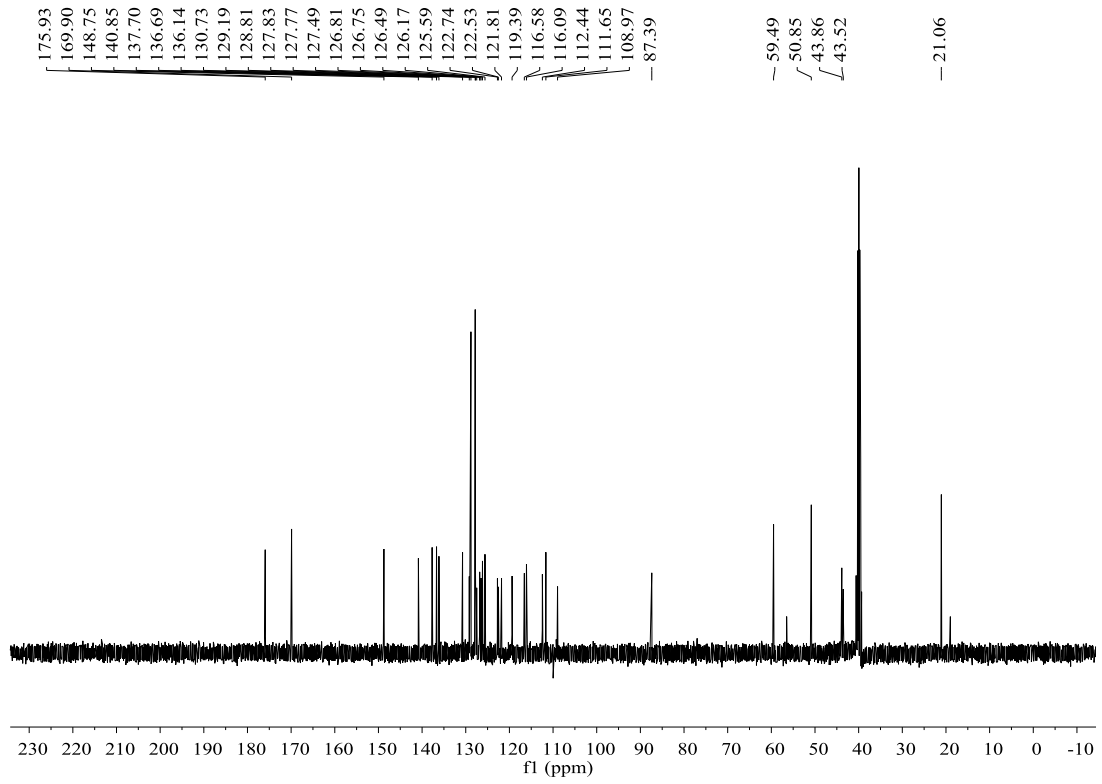

pH7 #73 RT: 0.93 AV: 1 NL: 8.38E+004  
 594.0818  
 FTMS: 594.0818 [100.0000-1500.0000]  
 590.0818 592.0818 594.0818 596.0818

Methyl

(Z)-2-(2-(1-benzyl-3-(1H-indol-3-yl)-5-methyl-2-oxindolin-3-yl)-2H-

benzo[b][1,4]thiazin-3(4H)-ylidene)acetate (**3f'**): white solid, 38%, m.p. 198 – 200°C; <sup>1</sup>H NMR (400 MHz, DMSO-*d*<sub>6</sub>) δ: 11.17 (d, *J* = 1.6 Hz, 1H, NH), 10.47 (s, 1H, NH), 7.38 (d, *J* = 8.0 Hz, 1H, ArH), 7.25 ~ 7.23 (m, 3H, ArH), 7.20 ~ 7.14 (m, 4H, ArH), 7.11 (d, *J* = 2.4 Hz, 1H, ArH), 7.07 ~ 7.04 (m, 1H, ArH), 7.02 ~ 6.98 (m, 1H, ArH), 6.91 ~ 6.87 (m, 2H, ArH), 6.86 ~ 6.82 (m, 1H, ArH), 6.63 ~ 6.59 (m, 2H, ArH), 6.38 (s, 1H, ArH), 5.21 (s, 1H, CH), 4.97 (s, 1H, CH), 4.93 (d, *J* = 16.0 Hz, 1H, CH), 4.60 (d, *J* = 16.0 Hz, 1H, CH), 3.62 (s, 3H, OCH<sub>3</sub>), 1.75 (s, 3H, CH<sub>3</sub>); <sup>13</sup>C NMR (101 MHz, DMSO-*d*<sub>6</sub>) δ: 176.5, 170.3, 147.9, 141.0, 137.5, 136.5, 135.7, 130.5, 129.2, 128.9, 128.1, 127.6, 127.6, 127.4, 127.1, 127.0, 126.5, 125.6, 123.2, 121.6, 121.1, 119.3, 117.9, 117.1, 112.3, 111.4, 108.9, 87.2, 60.0, 51.1, 44.9, 43.5, 20.8; IR (KBr) ν: 3436, 3249, 3063, 2970, 2883, 1683, 1652, 1616, 1579, 1489, 1434, 1373, 1344, 1288, 1225, 1157, 1108, 1077, 1027, 935, 881, 855, 803 cm<sup>-1</sup>; HRMS (ESI) Calcd. for C<sub>35</sub>H<sub>29</sub>N<sub>3</sub>O<sub>3</sub>S ([M+Na]<sup>+</sup>): 594.1822, Found: 594.1817.

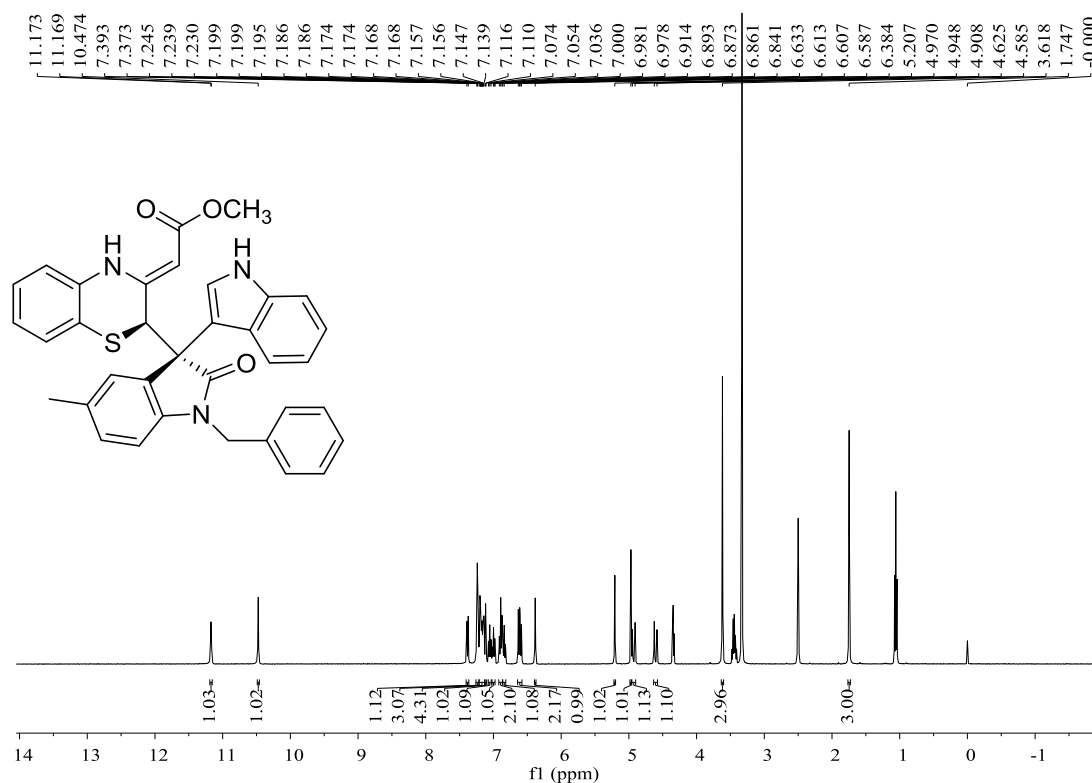



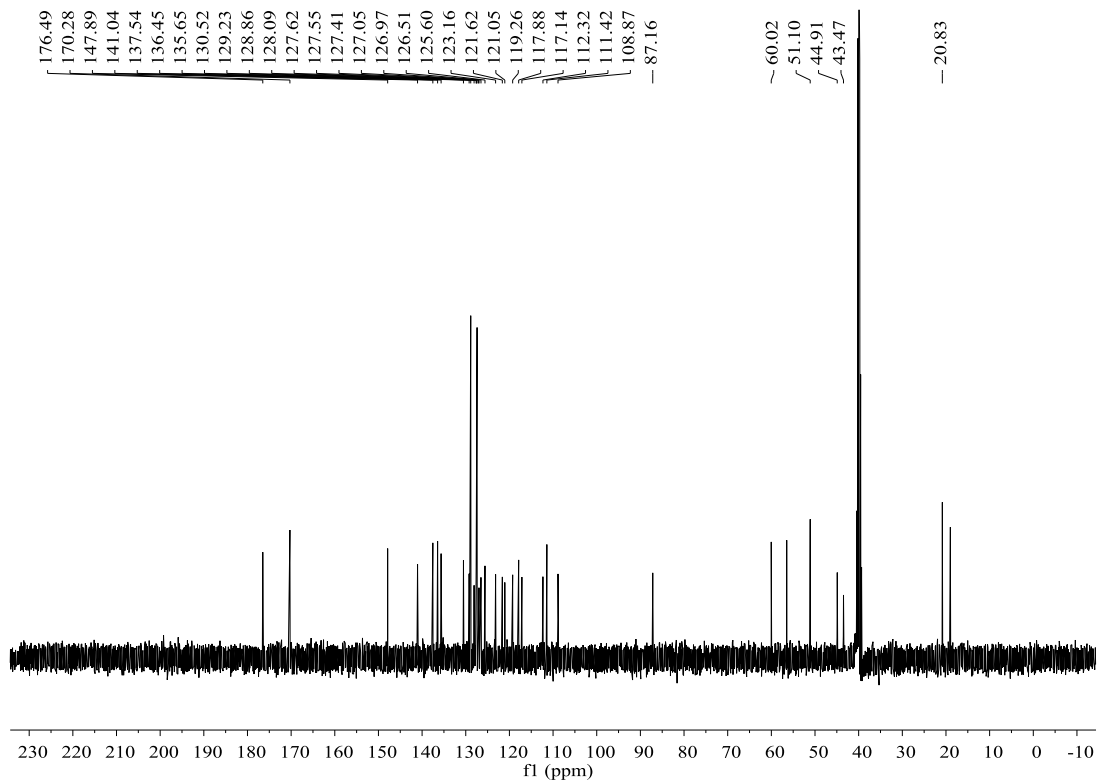

pln8 #66 RT: 0.84 AV: 1 NL: 1.48E+005  
594.1817  
[100.0000-1500.0000]  
35

Methyl

(Z)-2-(2-(1-benzyl-5-chloro-3-(1H-indol-3-yl)-2-oxindolin-3-yl)-2H-

benzo[b][1,4]thiazin-3(4H)-ylidene)acetate (**3g**): white solid, 46%, m.p. 146 – 148°C; <sup>1</sup>H NMR (400 MHz, DMSO-*d*<sub>6</sub>) δ: 11.11 (d, *J* = 2.4 Hz, 1H, NH), 10.92 (s, 1H, NH), 7.97 (d, *J* = 8.4 Hz, 1H, ArH), 7.43 ~ 7.35 (m, 5H, ArH), 7.31 ~ 7.28 (m, 1H, ArH), 7.15 ~ 7.11 (m, 2H, ArH), 7.06 ~ 7.00 (m, 2H, ArH), 6.93 ~ 6.89 (m, 2H, ArH), 6.85 ~ 6.83 (m, 1H, ArH), 6.69 (d, *J* = 8.4 Hz, 1H, ArH), 6.57 ~ 6.53 (m, 1H, ArH), 6.49 ~ 6.47 (m, 1H, ArH), 5.14 (s, 1H, CH), 5.02 (d, *J* = 16.0 Hz, 1H, CH), 4.72 (d, *J* = 16.0 Hz, 1H, CH), 4.23 (s, 1H, CH), 3.47 (s, 3H, OCH<sub>3</sub>); <sup>13</sup>C NMR (101 MHz, DMSO-*d*<sub>6</sub>) δ: NMR (101 MHz, ) δ 175.6, 169.9, 148.3, 142.2, 137.7, 136.3, 136.0, 129.0, 128.9, 128.3, 128.0, 127.2, 126.9, 126.6, 126.4, 126.4, 125.3, 122.7, 122.4, 122.0, 119.5, 116.8, 115.8, 112.6, 110.9, 110.6, 87.7, 59.6, 50.9, 43.6, 43.6; IR (KBr) ν: 3401, 3182, 3060, 2948, 2841, 1708, 1663, 1615, 1580, 1485, 1432, 1339, 1284, 1219, 1164, 1109, 1080, 1033, 970, 841, 808 cm<sup>-1</sup>; HRMS (ESI) Calcd. for C<sub>34</sub>H<sub>26</sub>ClN<sub>3</sub>O<sub>3</sub>S ([M+Na]<sup>+</sup>): 614.1276, Found: 614.1269.

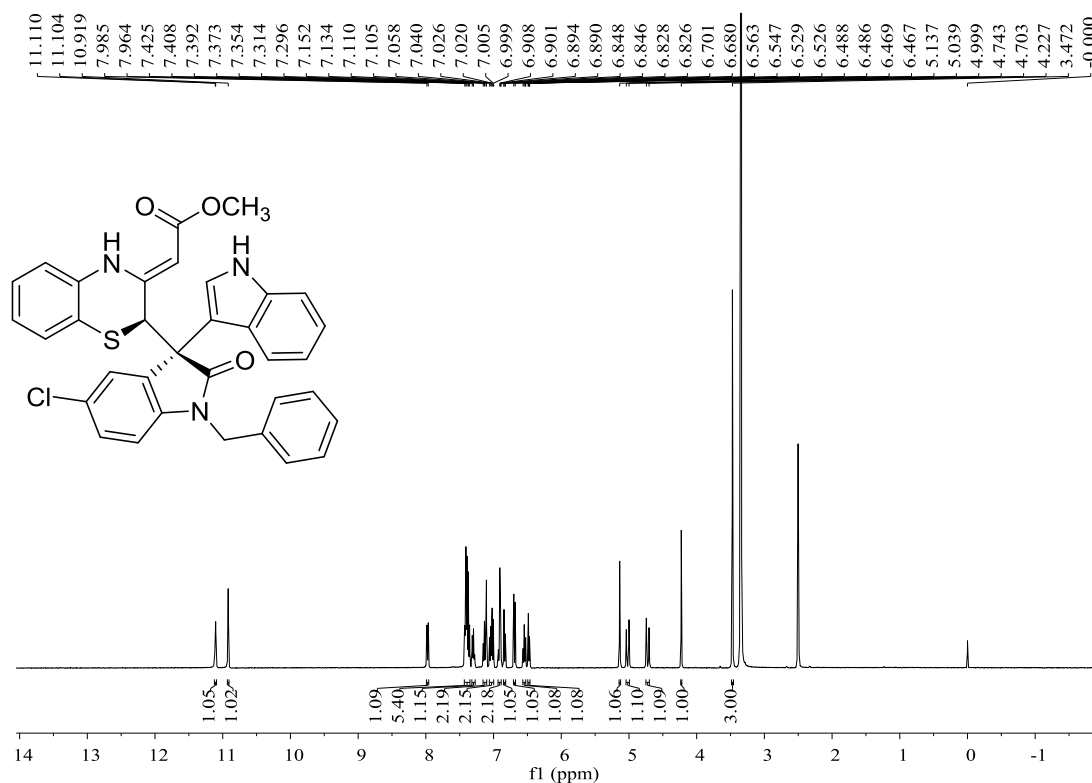

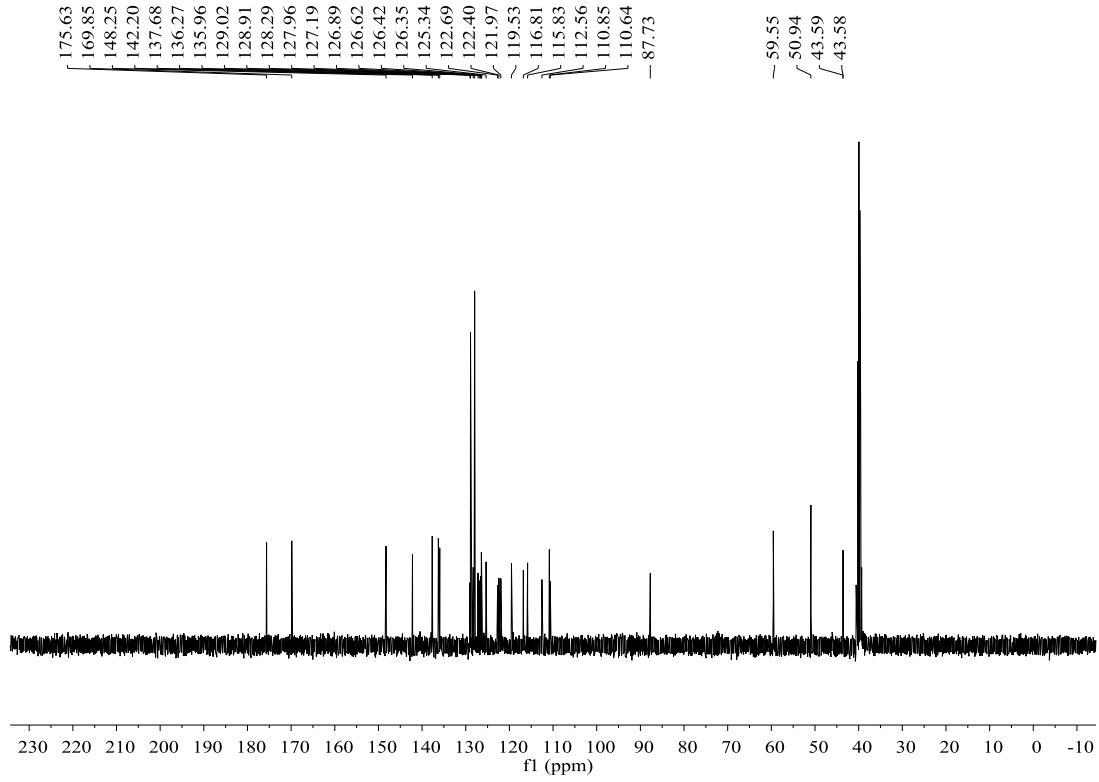

pH9 #63 RT: 0.80 AV: 1 NL: 1.49E+004  
 614.1269  
 FTMS: [0.545600000-1500.0000]  
 608091678 121 121 121 121 121 121

Methyl

(Z)-2-(2-(1-benzyl-5-chloro-3-(1H-indol-3-yl)-2-oxoindolin-3-yl)-2H-

benzo[b][1,4]thiazin-3(4H)-ylidene)acetate (**3g'**): white solid, 40%, m.p. 205 – 207°C; <sup>1</sup>H NMR (400 MHz, DMSO-*d*<sub>6</sub>) δ: 11.26 (d, *J* = 2.4 Hz, 1H, NH), 10.48 (s, 1H, NH), 7.40 (d, *J* = 8.0 Hz, 1H, ArH), 7.26 ~ 7.22 (m, 4H, ArH), 7.20 ~ 7.14 (m, 4H, ArH), 7.08 ~ 7.03 (m, 2H, ArH), 7.01 ~ 6.99 (m, 1H, ArH), 6.92 ~ 6.88 (m, 1H, ArH), 6.86 ~ 6.82 (m, 1H, ArH), 6.78 (d, *J* = 8.4 Hz, 1H, ArH), 6.66 ~ 6.64 (m, 1H, ArH), 6.53 (d, *J* = 2.0 Hz, 1H, ArH), 5.24 (s, 1H, CH), 4.95 (d, *J* = 16.0 Hz, 1H, CH), 4.95 (s, 1H, CH), 4.65 (d, *J* = 16.0 Hz, 1H, CH), 3.62 (s, 3H, OCH<sub>3</sub>); <sup>13</sup>C NMR (101 MHz, DMSO-*d*<sub>6</sub>) δ: NMR (101 MHz, ) δ 176.2, 170.2, 147.4, 142.3, 137.5, 136.0, 135.4, 129.7, 129.1, 129.0, 127.8, 127.5, 127.4, 127.3, 126.9, 126.6, 126.2, 125.4, 123.5, 121.8, 120.6, 119.4, 117.4, 117.2, 112.5, 110.6, 110.6, 87.5, 60.0, 51.2, 44.7, 43.6; IR (KBr) ν: 3482, 3272, 3062, 2950, 2855, 1694, 1658, 1615, 1579, 1483, 1433, 1342, 1287, 1225, 1161, 1110, 1080, 1028, 934, 893, 851, 815, 794 cm<sup>-1</sup>; HRMS (ESI) Calcd. for C<sub>34</sub>H<sub>26</sub>ClN<sub>3</sub>O<sub>3</sub>S ([M+Na]<sup>+</sup>): 614.1276, Found: 614.1270.

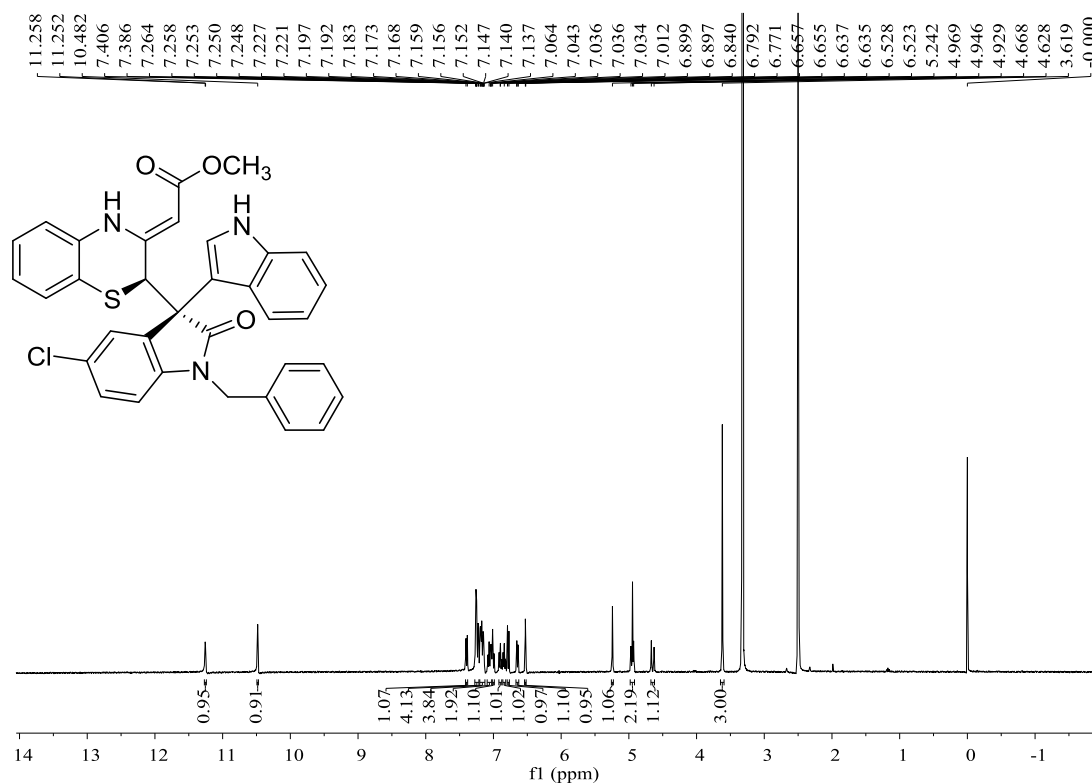

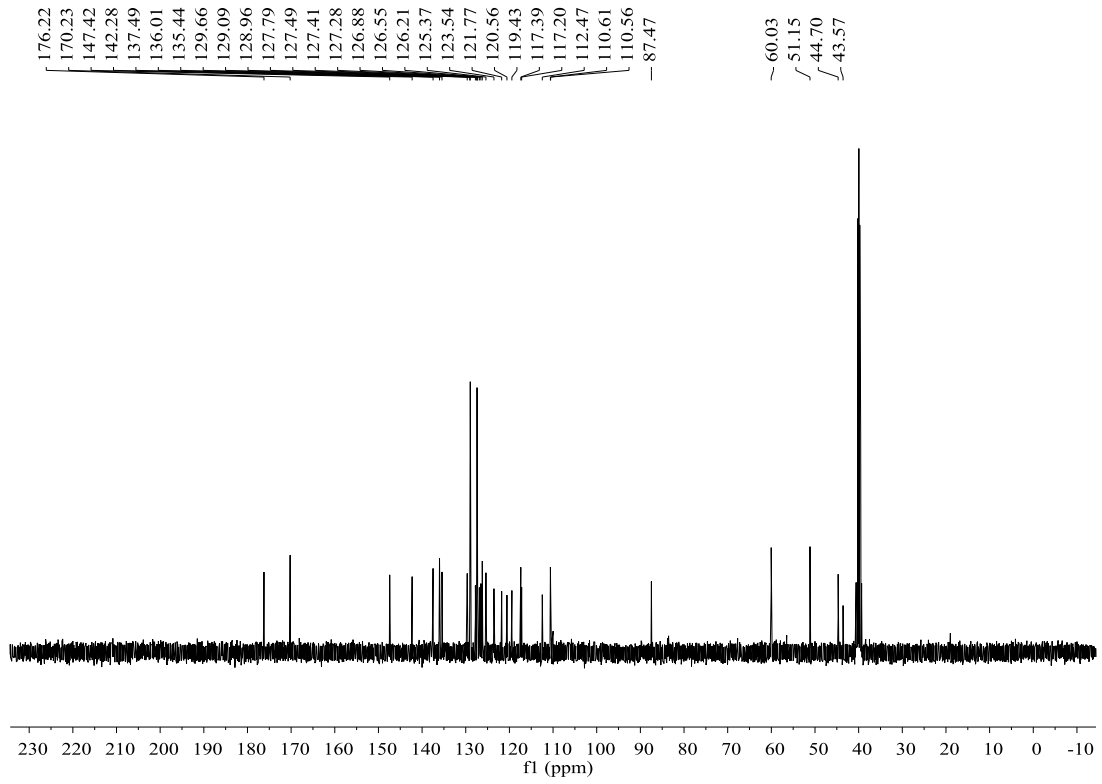

pln10 #45 RT: 0.57 AV: 1 NL: 2.88E+04  
 614.1270  
 [ETMS - 614.1270 (100.0000-1500.0000)]  
 610.1127 612.1127 614.1127 616.1127

Methyl

(Z)-2-(2-(1-butyl-5-chloro-3-(1H-indol-3-yl)-2-oxindolin-3-yl)-2H-

benzo[b][1,4]thiazin-3(4H)-ylidene)acetate (**3h**): white solid, 42%, m.p. 128 – 130<sup>o</sup>C; <sup>1</sup>H NMR (400 MHz, DMSO-*d*<sub>6</sub>) δ: 11.07 (d, *J* = 2.0 Hz, 1H, NH), 10.92 (s, 1H, NH), 7.92 (d, *J* = 8.0 Hz, 1H, ArH), 7.39 (d, *J* = 8.0 Hz, 1H, ArH), 7.13 ~ 7.06 (m, 3H, ArH), 7.04 ~ 7.00 (m, 1H, ArH), 6.97 ~ 6.91 (m, 2H, ArH), 6.88 (d, *J* = 8.4 Hz, 1H, ArH), 6.84 (d, *J* = 8.0 Hz, 1H, ArH), 6.69 ~ 6.62 (m, 2H, ArH), 5.05 (s, 1H, CH), 4.23 (s, 1H, CH), 3.74 ~ 3.66 (m, 1H, CH), 3.58 ~ 3.51 (m, 1H, CH), 3.47 (s, 3H, OCH<sub>3</sub>), 1.68 ~ 1.51 (m, 2H, CH), 1.43 ~ 1.29 (m, 2H, CH), 0.93 ~ 0.90 (m, 3H, CH<sub>3</sub>); <sup>13</sup>C NMR (101 MHz, DMSO-*d*<sub>6</sub>) δ: 180.0, 174.6, 153.1, 147.4, 142.3, 140.6, 133.8, 133.1, 131.9, 131.5, 131.3, 130.9, 130.8, 130.1, 127.4, 127.1, 126.6, 124.1, 121.5, 120.7, 117.2, 115.5, 114.8, 92.4, 63.9, 55.6, 48.4, 34.2, 24.8, 18.8; IR (KBr) ν: 3382, 3174, 3067, 2958, 2865, 1700, 1661, 1616, 1581, 1485, 1433, 1348, 1284, 1218, 1163, 1108, 1080, 1032, 939, 878, 845, 805 cm<sup>-1</sup>; HRMS (ESI) Calcd. for C<sub>31</sub>H<sub>28</sub>ClN<sub>3</sub>O<sub>3</sub>S ([M+Na]<sup>+</sup>): 580.1432, Found: 580.1426.

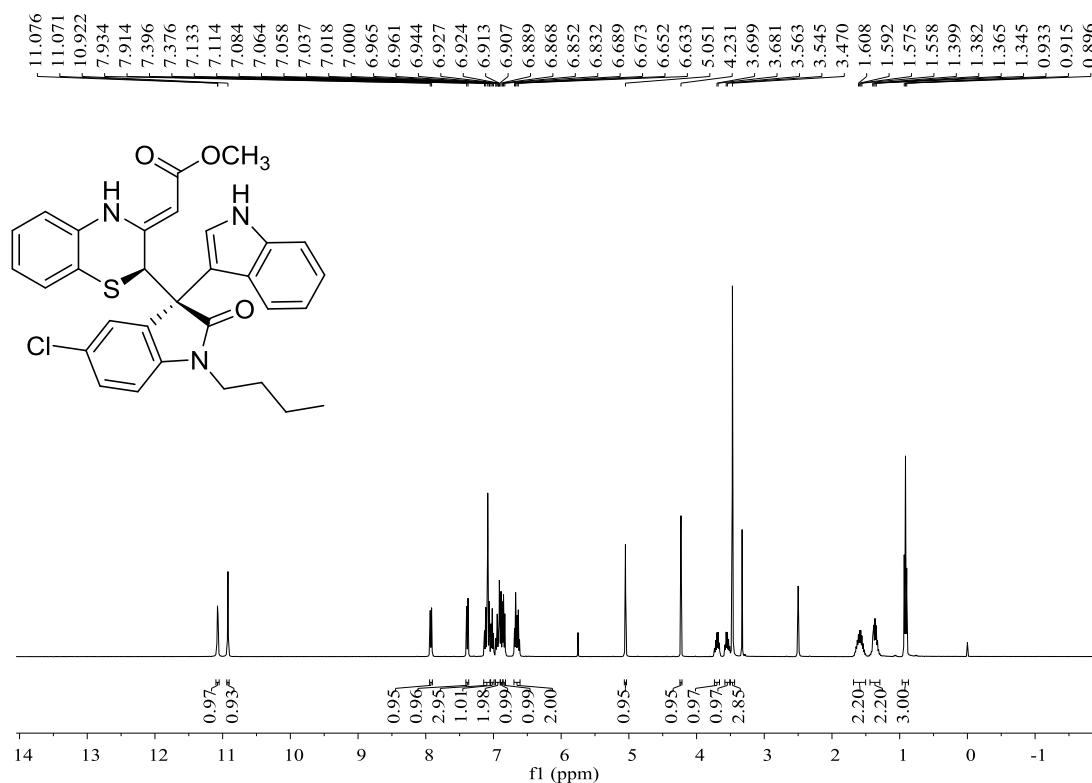

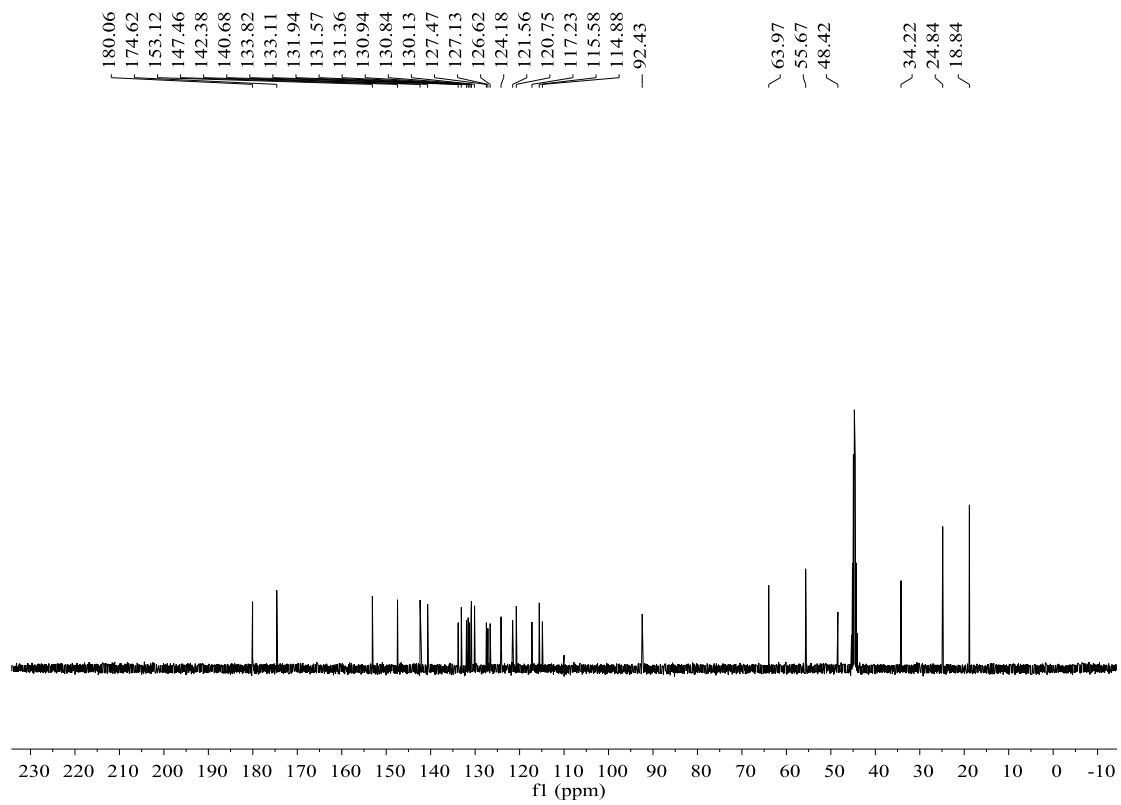

ph11 #64 RT: 0.81 AV: 1 NL: 3.74E+04  
 580.1426  
 FTMS + 0.5801678 [480.0000-1500.0000]  
 376000000 160158 150002.0

Methyl

(Z)-2-(2-(1-butyl-5-chloro-3-(1H-indol-3-yl)-2-oxindolin-3-yl)-2H-

benzo[b][1,4]thiazin-3(4H)-ylidene)acetate (**3h'**): white solid, 42%, m.p. 122 – 124°C; <sup>1</sup>H NMR (400 MHz, DMSO-*d*<sub>6</sub>) δ: 11.22 (s, 1H, NH), 10.46 (s, 1H, NH), 7.38 (d, *J* = 8.4 Hz, 1H, ArH), 7.23 ~ 7.21 (m, 2H, ArH), 7.12 (d, *J* = 7.6 Hz, 1H, ArH), 7.07 ~ 6.99 (m, 4H, ArH), 6.91 ~ 6.82 (m, 2H, ArH), 6.63 (d, *J* = 8.0 Hz, 1H, ArH), 6.50 (d, *J* = 1.6 Hz, 1H, ArH), 5.14 (s, 1H, CH), 4.88 (s, 1H, CH), 3.69 ~ 3.64 (m, 1H, CH), 3.61 (s, 3H, OCH<sub>3</sub>), 3.48 ~ 3.39 (m, 1H, CH), 1.47 ~ 1.39 (m, 2H, CH), 1.29 ~ 1.20 (m, 2H, CH), 0.87 ~ 0.84 (m, 3H, CH<sub>3</sub>); <sup>13</sup>C NMR (101 MHz, DMSO-*d*<sub>6</sub>) δ: 234.3, 175.9, 170.1, 147.4, 142.6, 137.4, 135.3, 129.6, 129.1, 127.4, 127.1, 126.8, 126.4, 125.8, 125.4, 123.4, 121.6, 120.4, 119.3, 117.2, 117.0, 112.3, 110.3, 109.9, 87.1, 59.6, 51.0, 44.8, 29.3, 20.0, 14.1; IR (KBr) ν: 3446, 3248, 3064, 2958, 2869, 1691, 1658, 1616, 1580, 1483, 1435, 1353, 1288, 1226, 1163, 1112, 1080, 1039, 932, 888, 796 cm<sup>-1</sup>; HRMS (ESI) Calcd. for C<sub>31</sub>H<sub>28</sub>ClN<sub>3</sub>O<sub>3</sub>S ([M+Na]<sup>+</sup>): 580.1432, Found: 580.1426.

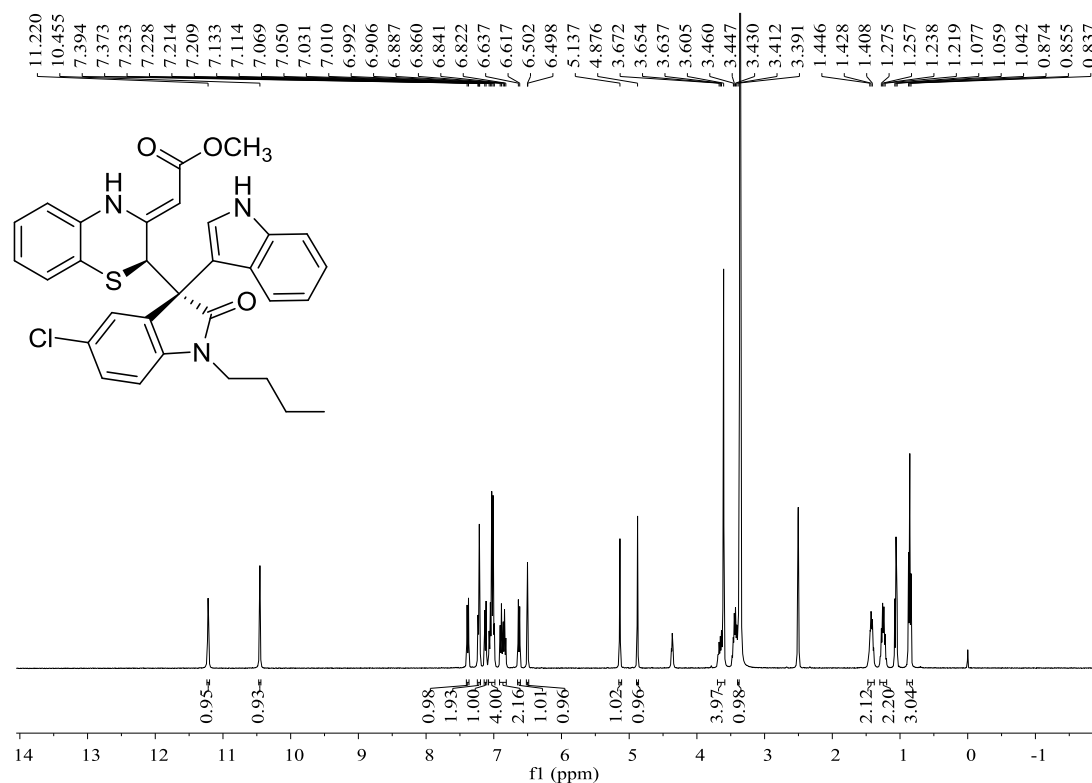



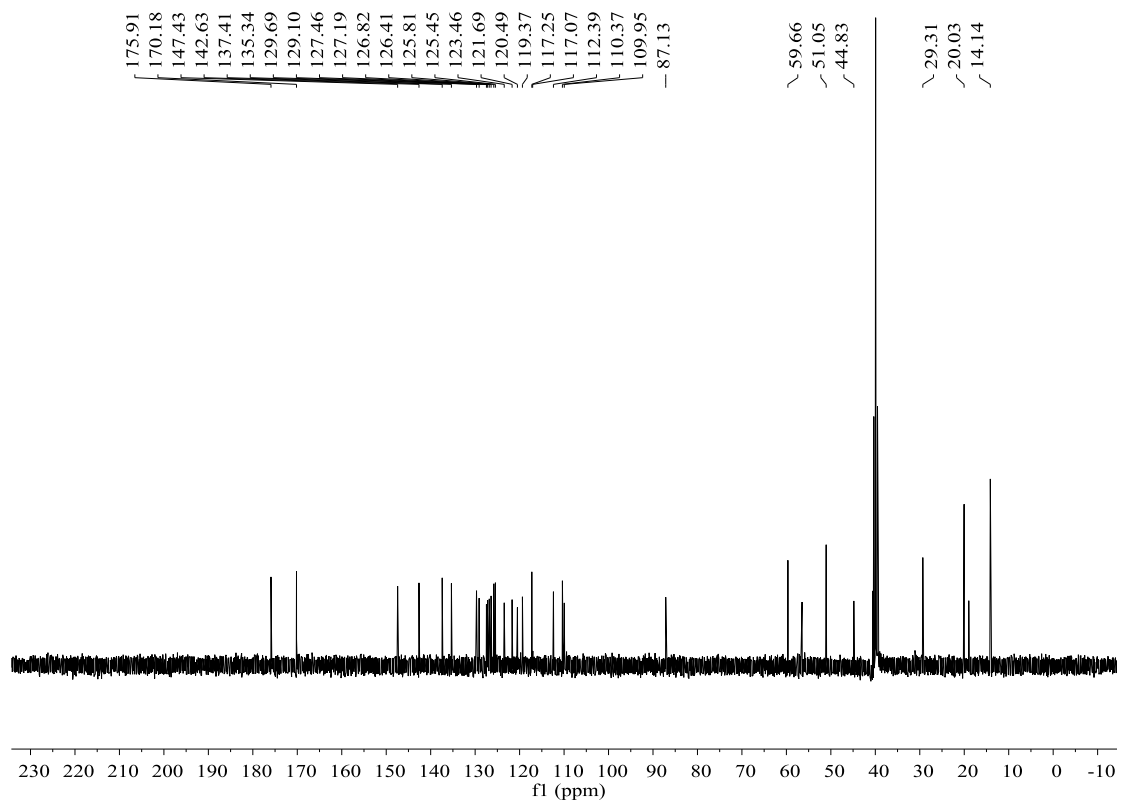

ph12 #80 RT: 1.02 AV: 1 NL: 4.87E+004  
 580.1426  
 FTMS +58812336 [400.0000-1500.0000]  
 58812336

**Methyl 1-benzyl-2-oxo-12',12b'-dihydro-5'H-spiro[indoline-3,7'-indolo[3,2-c]phenothiazine]-6'-carboxylate (4a):** white solid, 50%, m.p. 273 – 276°C; <sup>1</sup>H NMR (400 MHz, DMSO-*d*<sub>6</sub>) δ: 11.64 (s, 1H, NH), 11.45 (s, 1H, NH), 7.59 (d, *J* = 6.8 Hz, 2H, ArH), 7.44 ~ 7.37 (m, 3H, ArH), 7.35 ~ 7.32 (m, 2H, ArH), 7.29 ~ 7.20 (m, 4H, ArH), 7.08 ~ 7.00 (m, 2H, ArH), 6.87 ~ 6.83 (m, 1H, ArH), 6.76 (d, *J* = 7.2 Hz, 1H, ArH), 6.63 (t, *J* = 7.6 Hz, 1H, ArH), 6.52 (d, *J* = 8.0 Hz, 1H, ArH), 5.56 (s, 1H, CH), 5.03 (s, 2H, CH), 3.06 (s, 3H, OCH<sub>3</sub>); <sup>13</sup>C NMR (101 MHz, DMSO-*d*<sub>6</sub>) δ: 178.1, 169.4, 149.6, 143.6, 137.5, 137.1, 136.9, 135.5, 129.3, 129.0, 128.3, 128.3, 128.2, 128.1, 127.6, 123.3, 123.1, 122.9, 122.6, 122.5, 121.4, 119.6, 119.0, 118.6, 112.1, 109.1, 108.6, 92.9, 51.5, 51.3, 44.3, 35.8; IR (KBr) ν: 3240, 3064, 2949, 1695, 1662, 1609, 1565, 1484, 1459, 1371, 1347, 1245, 1179, 1072, 1043, 1001, 952, 924, 843, 787 cm<sup>-1</sup>; HRMS (ESI) Calcd. for C<sub>34</sub>H<sub>25</sub>N<sub>3</sub>O<sub>3</sub>S ([M+Na]<sup>+</sup>): 578.1509, Found: 578.1505.

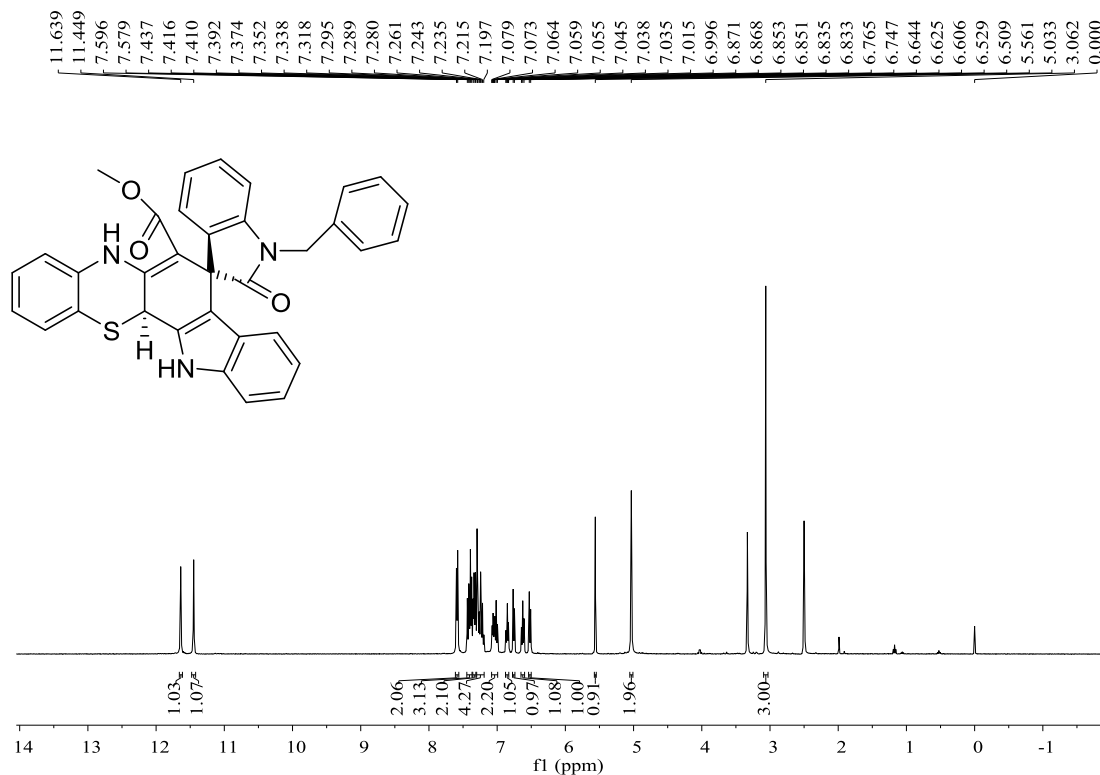

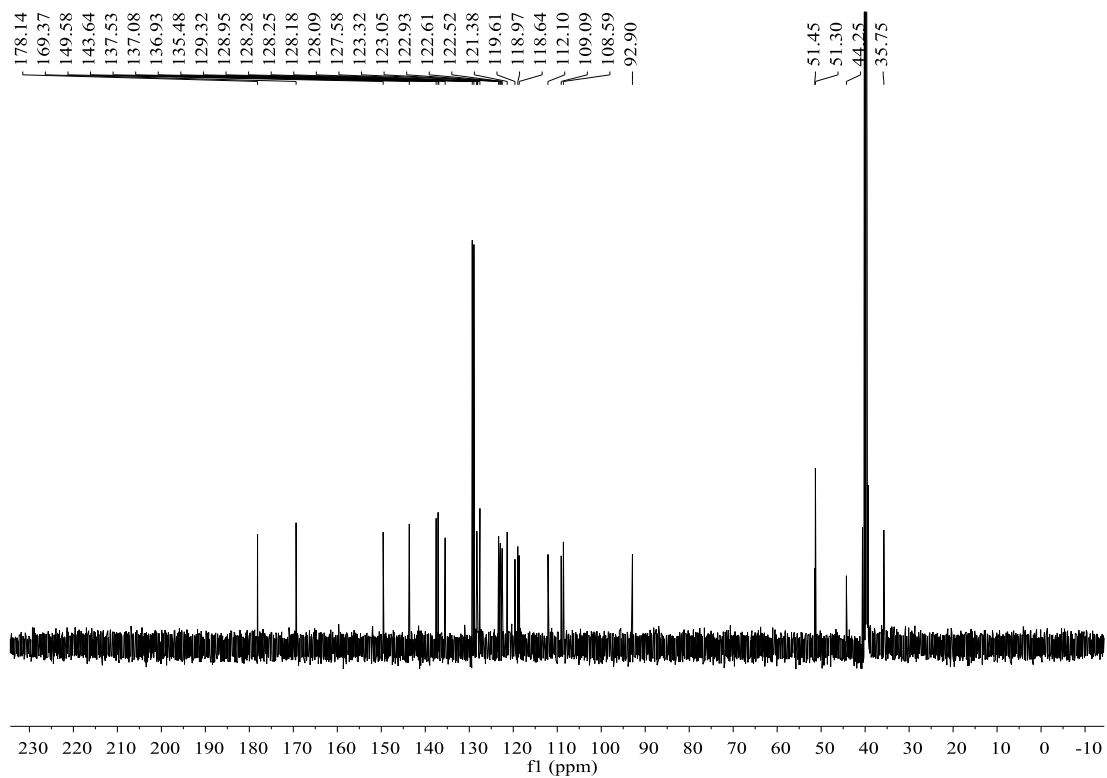

p1h22 #57 RT: 0.72 AV: 1 NL: 8.63E+004  
 578.1505  
 FTMS +1574.1600 [400.0000-1500.0000]  
 578.1505

**Methyl 1-benzyl-5-methyl-2-oxo-12',12b'-dihydro-5'H-spiro[indoline-3,7'-indolo[3,2-c]phenothiazine]-6'-carboxylate (4b)**: white solid, 48%, m.p. 302 – 304°C; <sup>1</sup>H NMR (400 MHz, DMSO-*d*<sub>6</sub>) δ: 11.63 (s, 1H, NH), 11.46 (s, 1H, NH), 7.58 (d, *J* = 7.2 Hz, 2H, ArH), 7.44 ~ 7.37 (m, 3H, ArH), 7.35 ~ 7.32 (m, 2H, ArH), 7.29 ~ 7.26 (m, 2H, ArH), 7.13 (d, *J* = 8.0 Hz, 1H, ArH), 7.08 ~ 7.05 (m, 1H, ArH), 7.04 ~ 7.00 (m, 2H, ArH), 6.65 ~ 6.61 (m, 1H, ArH), 6.57 ~ 6.53 (m, 2H, ArH), 5.55 (s, 1H, CH), 5.00 (s, 2H, CH), 3.07 (s, 3H, OCH<sub>3</sub>), 2.08 (s, 3H, CH<sub>3</sub>); <sup>13</sup>C NMR (101 MHz, DMSO-*d*<sub>6</sub>) δ: 178.0, 169.4, 149.5, 141.3, 137.5, 137.2, 136.9, 135.5, 131.7, 129.3, 128.9, 128.4, 128.3, 128.3, 128.1, 127.5, 123.4, 123.2, 123.0, 122.5, 121.4, 119.6, 119.0, 118.7, 112.1, 108.9, 108.8, 93.0, 51.5, 51.4, 44.3, 35.7, 21.0; IR (KBr) ν: 3184, 3065, 2950, 1691, 1661, 1609, 1591, 1566, 1489, 1459, 1435, 1373, 1330, 1248, 1183, 1073, 1028, 925, 800, 780 cm<sup>-1</sup>; HRMS (ESI) Calcd. for C<sub>35</sub>H<sub>27</sub>N<sub>3</sub>O<sub>3</sub>S ([M+Na]<sup>+</sup>): 592.1665, Found: 592.1664.

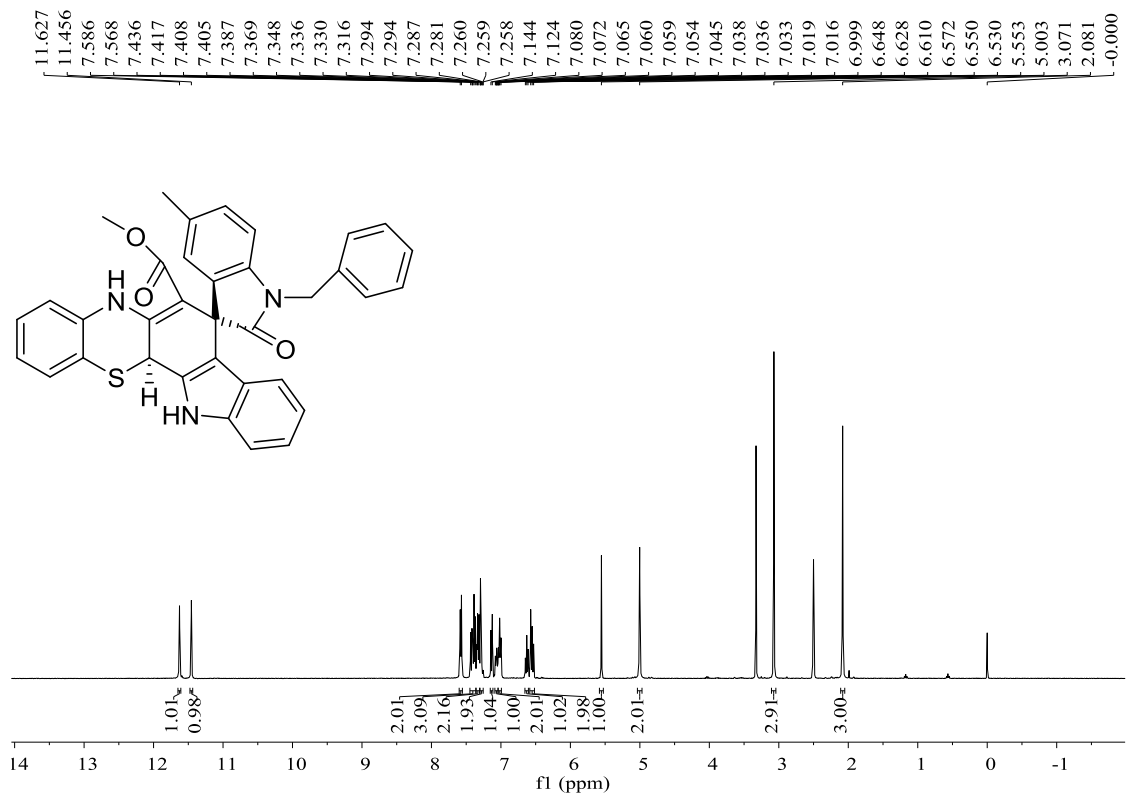

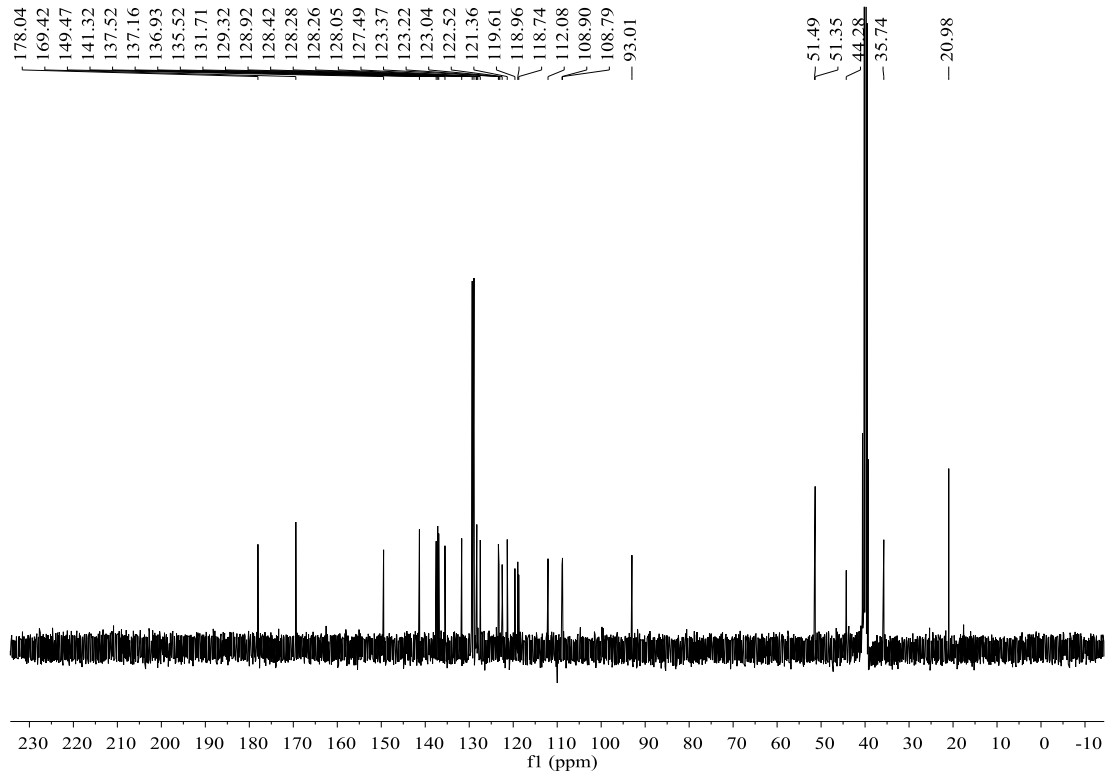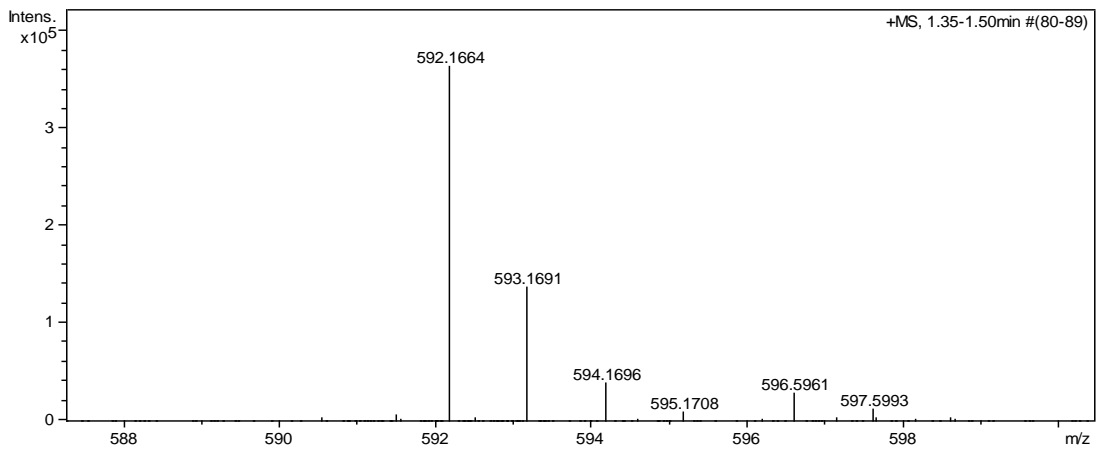

**Methyl 1-benzyl-5-chloro-2-oxo-12',12b'-dihydro-5'H-spiro[indoline-3,7'-indolo[3,2-c]phenothiazine]-6'-carboxylate (4c)**: white solid, 49%, m.p. 268 – 270°C; <sup>1</sup>H NMR (400 MHz, DMSO-*d*<sub>6</sub>) δ: 11.73 (s, 1H, NH), 11.47 (s, 1H, NH), 7.58 (d, *J* = 6.8 Hz, 2H, ArH), 7.45 ~ 7.38 (m, 2H, ArH), 7.37 ~ 7.33 (m, 2H, ArH), 7.33 ~ 7.27 (m, 4H, ArH), 7.09 ~ 7.03 (m, 2H, ArH), 6.69 ~ 6.65 (m, 2H, ArH), 6.52 (d, *J* = 8.0 Hz, 1H, ArH), 5.60 (s, 1H, CH), 5.05 (s, 2H, CH), 3.10 (s, 3H, OCH<sub>3</sub>); <sup>13</sup>C NMR (101 MHz, DMSO-*d*<sub>6</sub>) δ: 177.8, 169.1, 149.9, 142.6, 137.7, 137.5, 136.8, 136.7, 129.4, 129.0, 128.3, 128.2, 128.1, 127.8, 126.8, 123.2, 123.1, 122.7, 122.5, 121.4, 119.9, 119.1, 118.3, 112.3, 110.7, 107.8, 92.1, 51.5, 51.4, 44.3, 35.6; IR (KBr) ν: 3290, 3066, 2953, 1697, 1659, 1610, 1588, 1565, 1480, 1430, 1327, 1246, 1168, 1111, 1073, 1031, 936, 890, 802 cm<sup>-1</sup>; HRMS (ESI) Calcd. for C<sub>34</sub>H<sub>24</sub>ClN<sub>3</sub>O<sub>3</sub>S ([M+Na]<sup>+</sup>): 612.1119, Found: 612.1110.

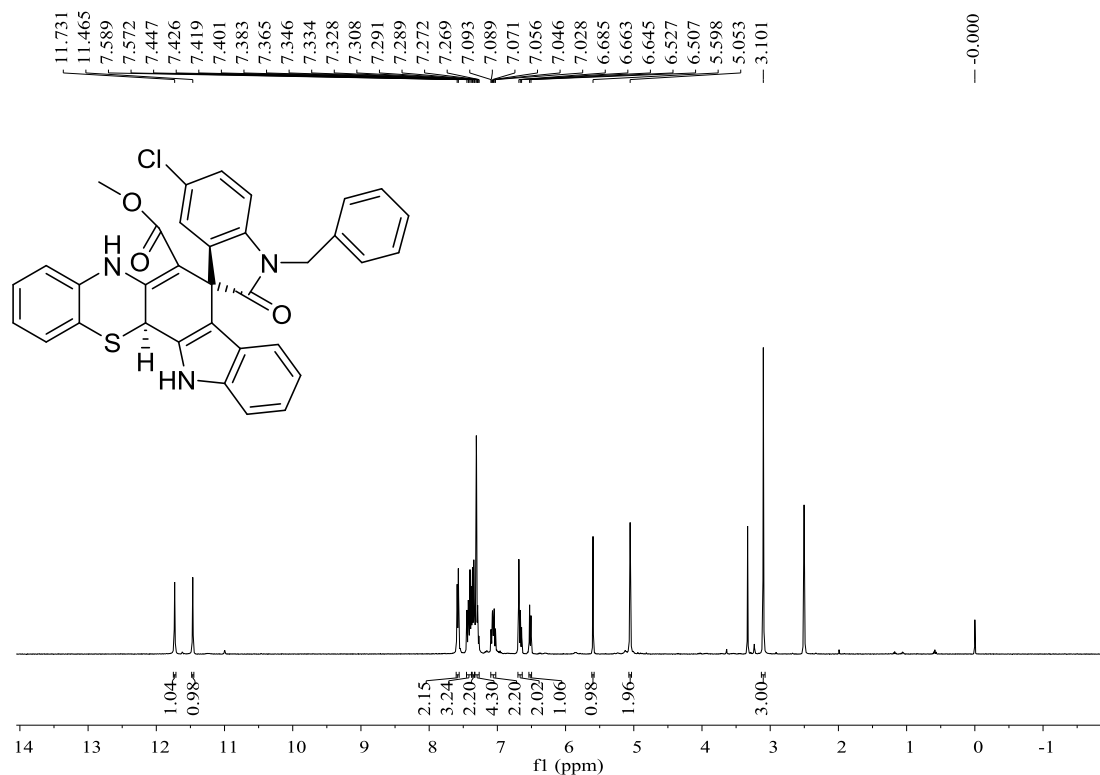

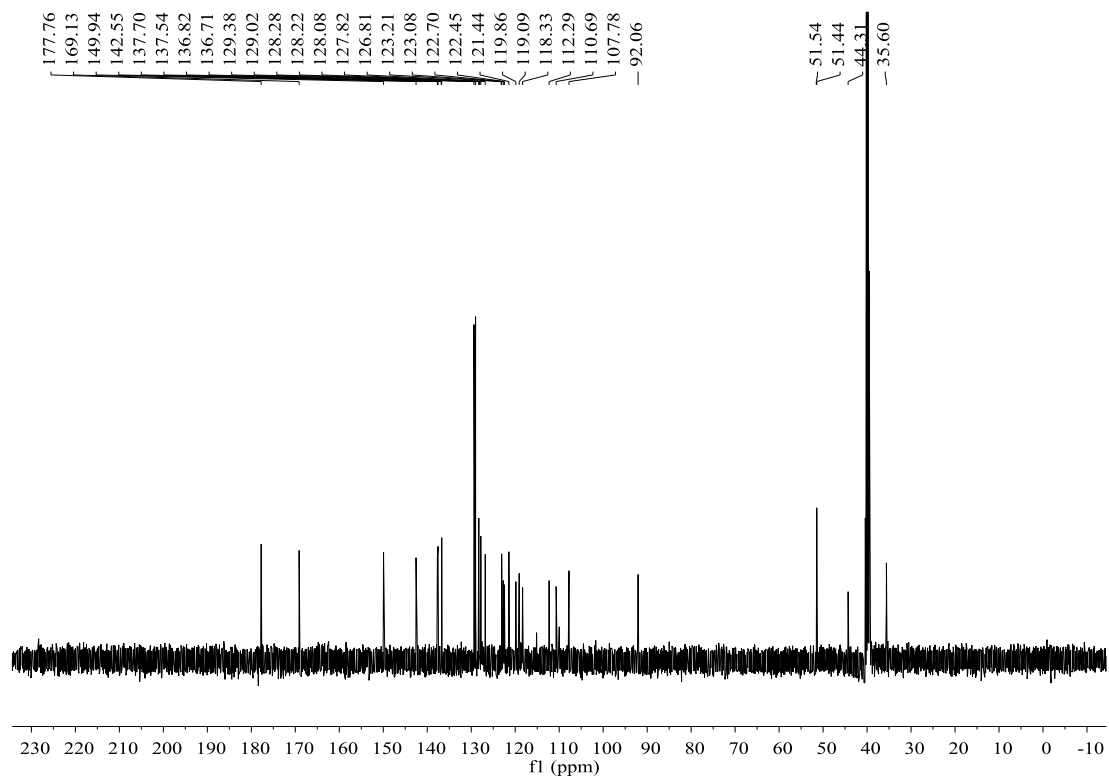

ph24 #64 RT: 0.81 AV: 1 NL: 2.32E+004  
612.4110  
FTMS # 23284978 [100.0000-1500.0000]  
0086609181818181818

**Methyl 1-benzyl-5-fluoro-2-oxo-12',12b'-dihydro-5'H-spiro[indoline-3,7'-indolo[3,2-c]phenothiazine]-6'-carboxylate (4d)**: white solid, 57%, m.p. 269 – 271°C; <sup>1</sup>H NMR (400 MHz, DMSO-*d*<sub>6</sub>) δ: 11.70 (s, 1H, NH), 11.47 (s, 1H, NH), 7.58 (d, *J* = 7.2 Hz, 2H, ArH), 7.44 ~ 7.40 (m, 2H, ArH), 7.38 ~ 7.33 (m, 3H, ArH), 7.31 ~ 7.24 (m, 3H, ArH), 7.10 ~ 7.02 (m, 3H, ArH), 6.68 ~ 6.64 (m, 1H, ArH), 6.56 ~ 6.50 (m, 2H, ArH), 5.58 (s, 1H, CH), 5.04 (s, 2H, CH), 3.10 (s, 3H, OCH<sub>3</sub>); <sup>13</sup>C NMR (101 MHz, DMSO-*d*<sub>6</sub>) δ: 177.9, 169.2, 158.9 (d, *J* = 239.4 Hz), 149.9, 139.9, 137.6, 137.5, 137.5, 136.9 (d, *J* = 2.0 Hz), 129.3, 129.0, 128.3, 128.2, 127.8, 123.2, 122.6, 121.4, 119.8, 119.0, 118.4, 114.3 (d, *J* = 23.2 Hz), 112.2, 110.3 (d, *J* = 25.3 Hz), 110.0 (d, *J* = 8.1 Hz), 107.8, 92.2, 51.8, 51.4, 44.3, 35.6; IR (KBr) ν: 3184, 3065, 2949, 1699, 1663, 1612, 1586, 1564, 1486, 1454, 1336, 1250, 1172, 1075, 1048, 1025, 943, 861, 806, 777 cm<sup>-1</sup>; HRMS (ESI) Calcd. for C<sub>34</sub>H<sub>24</sub>FN<sub>3</sub>O<sub>3</sub>S ([M+Na]<sup>+</sup>): 596.1415, Found: 596.1409.

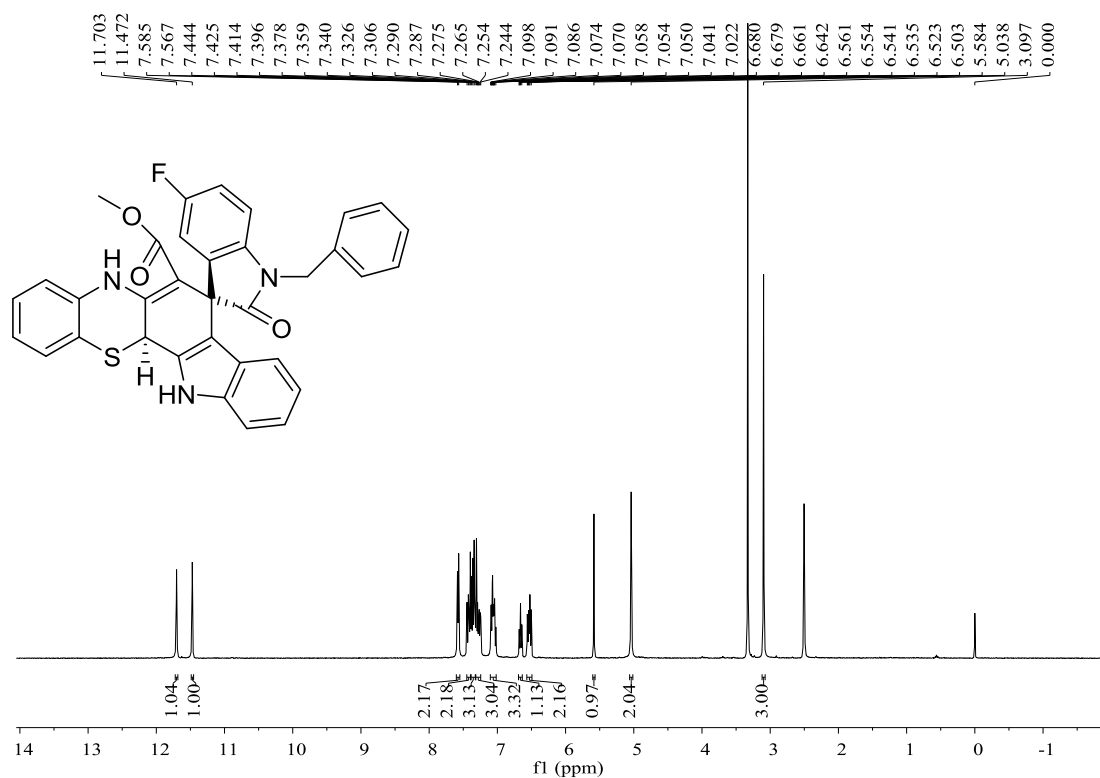



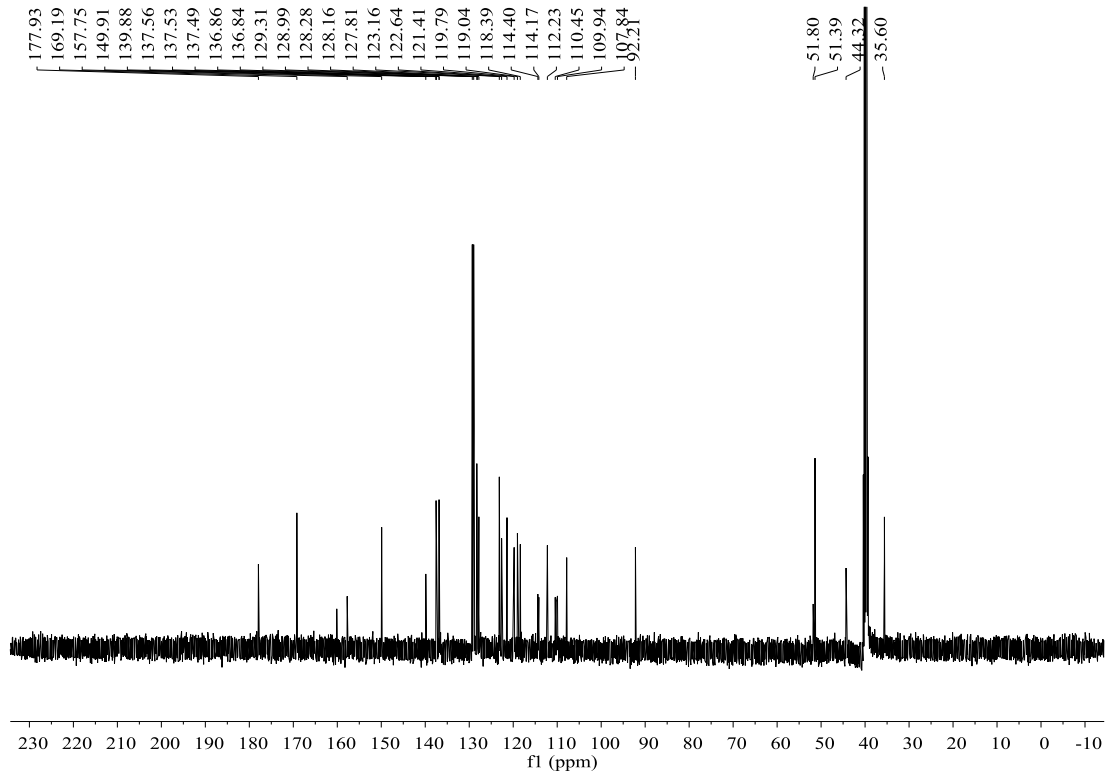

pln25 #56 RT: 0.71 AV: 1 NL: 3.95E+004  
 5961409  
 FTMS + 0.150731428 [100.0000-1500.0000]  
 0.35929399586959660601

**Methyl 1-butyl-5-methyl-2-oxo-12',12b'-dihydro-5'H-spiro[indoline-3,7'-indolo[3,2-c]phenothiazine]-6'-carboxylate (4e)**: white solid, 38%, m.p. 245 – 247°C; <sup>1</sup>H NMR (400 MHz, DMSO-*d*<sub>6</sub>) δ: 11.60 (s, 1H, NH), 11.45 (s, 1H, NH), 7.42 (d, *J* = 7.6 Hz, 1H, ArH), 7.33 (d, *J* = 8.4 Hz, 1H, ArH), 7.29 ~ 7.26 (m, 2H, ArH), 7.06 ~ 7.01 (m, 4H, ArH), 6.77 ~ 6.73 (m, 1H, ArH), 6.71 ~ 6.66 (m, 1H, ArH), 6.58 (m, 1H, ArH), 5.53 (s, 1H, CH), 3.80 ~ 3.77 (m, 2H, CH), 3.36 (s, 3H, OCH<sub>3</sub>), 2.11 (s, 3H, CH<sub>3</sub>), 1.73 ~ 1.66 (m, 2H, CH), 1.49 ~ 1.41 (m, 2H, CH), 0.98 ~ 0.94 (m, 3H, CH<sub>3</sub>); <sup>13</sup>C NMR (101 MHz, DMSO-*d*<sub>6</sub>) δ: 177.7, 169.4, 149.4, 141.6, 137.5, 137.0, 135.6, 131.4, 128.5, 128.3, 128.3, 127.4, 123.4, 123.2, 123.0, 122.5, 121.4, 119.7, 119.0, 118.5, 112.1, 108.9, 108.4, 93.2, 51.4, 51.4, 35.8, 29.9, 21.0, 20.4, 14.2; IR (KBr) ν: 3175, 2954, 2870, 1693, 1659, 1598, 1565, 1488, 1437, 1378, 1349, 1250, 1193, 1136, 1053, 888, 807 cm<sup>-1</sup>; HRMS (ESI) Calcd. for C<sub>32</sub>H<sub>29</sub>N<sub>3</sub>O<sub>3</sub>S ([M+Na]<sup>+</sup>): 558.1822, Found: 558.1816.

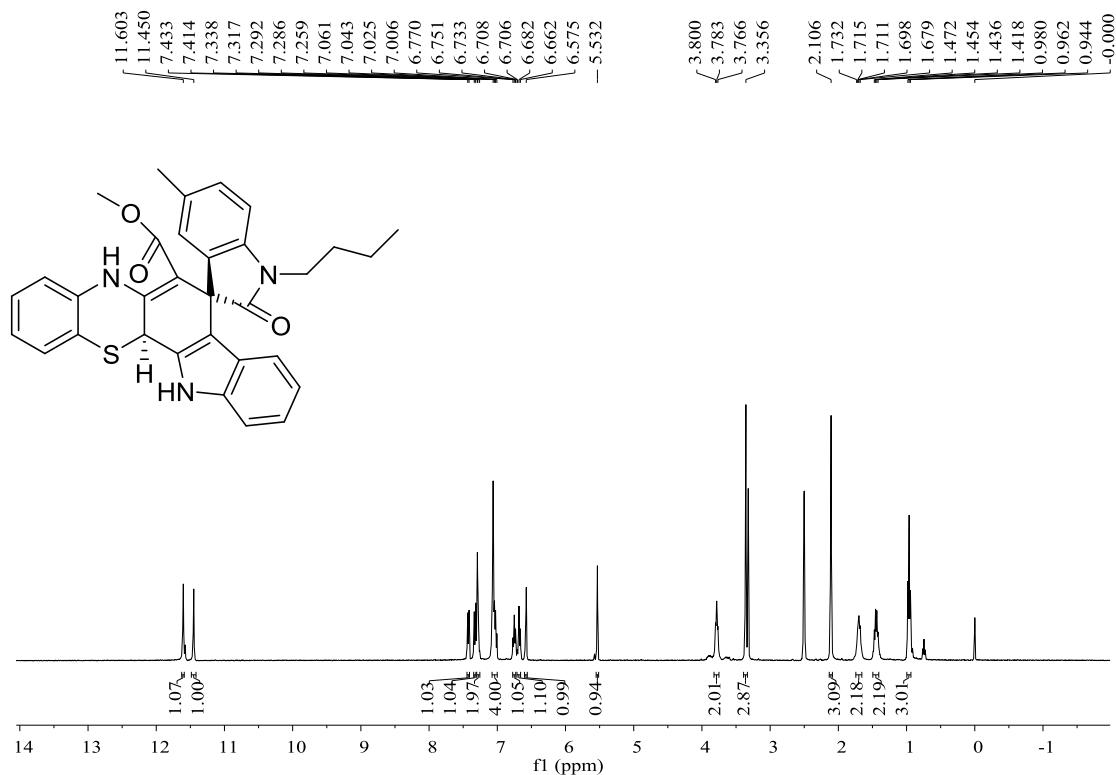

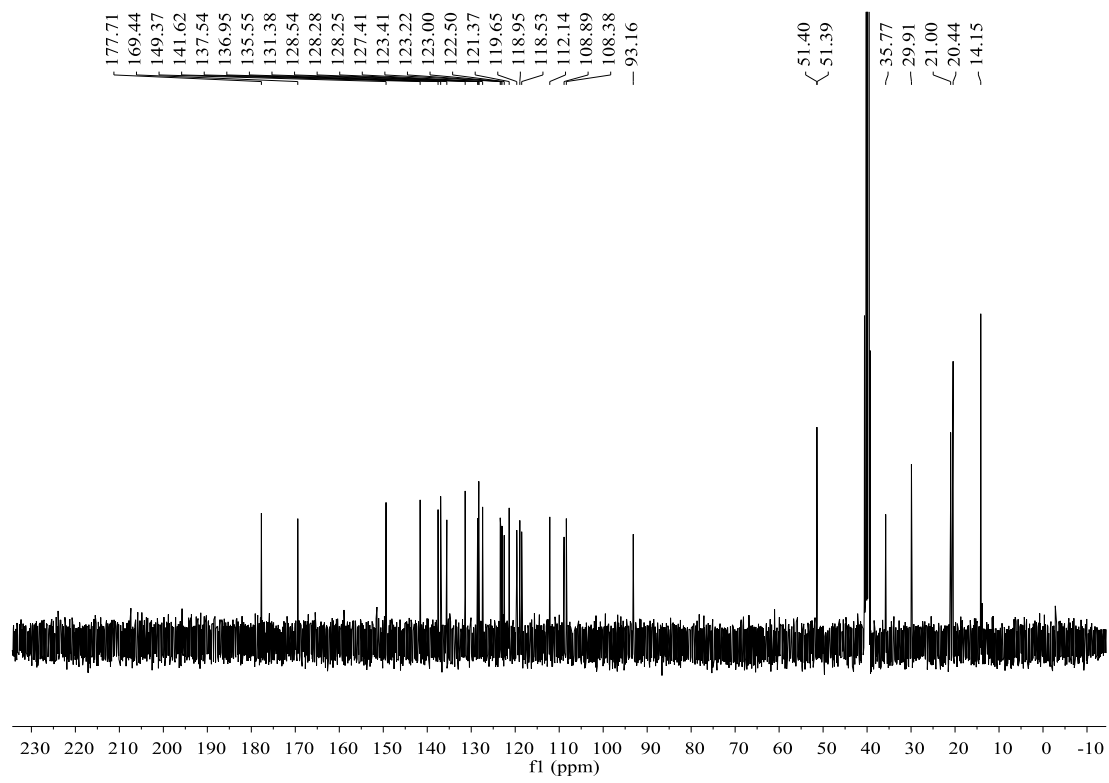

ph26 #46 RT: 0.58 AV: 1 NL: 1.17E+005  
 558.1816  
 FTMS (1500.0000-1500.0000)  
 1500.0000  
 1500.0000

**Methyl 1-butyl-5-chloro-2-oxo-12',12b'-dihydro-5'H-spiro[indoline-3,7'-indolo[3,2-c]phenothiazine]-6'-carboxylate (4f)**: white solid, 43%, m.p. 267 – 269°C; <sup>1</sup>H NMR (400 MHz, DMSO-*d*<sub>6</sub>) δ: 11.71 (s, 1H, NH), 11.46 (s, 1H, NH), 7.43 (d, *J* = 7.6 Hz, 1H, ArH), 7.37 ~ 7.23 (m, 5H, ArH), 7.09 ~ 7.04 (m, 2H, ArH), 6.81 ~ 6.78 (m, 1H, ArH), 6.69 ~ 6.65 (m, 2H, ArH), 5.58 (s, 1H, CH), 3.88 ~ 3.77 (m, 2H, CH), 3.40 (s, 3H, OCH<sub>3</sub>), 1.75 ~ 1.64 (m, 2H, CH), 1.49 ~ 1.40 (m, 2H, CH), 0.98 ~ 0.94 (m, 3H, CH<sub>3</sub>); <sup>13</sup>C NMR (101 MHz, DMSO-*d*<sub>6</sub>) δ: 177.5, 169.1, 149.8, 142.9, 137.7, 137.5, 136.8, 128.3, 128.2, 127.7, 126.5, 123.2, 123.1, 122.7, 122.4, 121.4, 119.9, 119.1, 118.1, 112.4, 110.3, 107.8, 92.2, 51.5, 51.4, 35.6, 29.8, 20.4, 14.1; IR (KBr) ν: 3170, 2955, 2869, 1696, 1663, 1591, 1565, 1479, 1431, 1347, 1246, 1189, 1139, 1106, 1071, 1025, 930, 888, 803 cm<sup>-1</sup>; HRMS (ESI) Calcd. for C<sub>31</sub>H<sub>26</sub>ClN<sub>3</sub>O<sub>3</sub>S ([M+Na]<sup>+</sup>): 578.1276, Found: 578.1270.

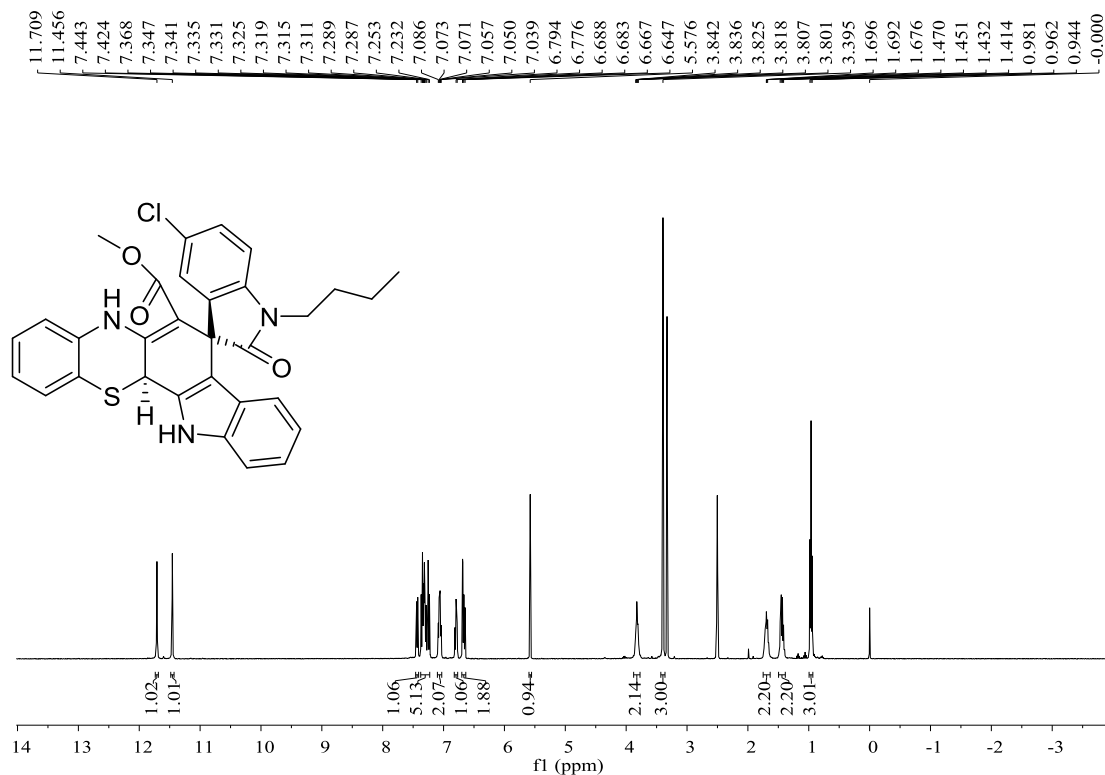

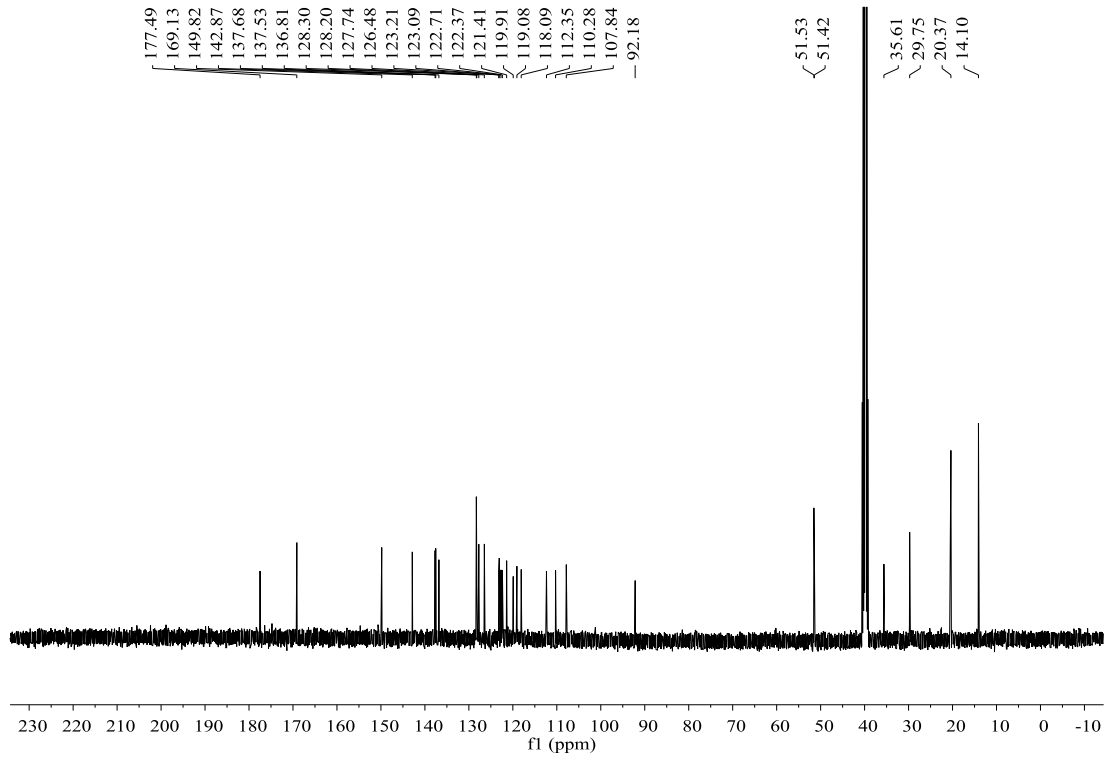

ph27 #68 RT: 0.86 AV: 1 NL: 3.10E+04  
 578.1270  
 [ETMS + (1.500000-1500.0000)]  
 578.1270 1.000000 1.000000 1.000000  
 578.1270 1.000000 1.000000 1.000000

**Methyl 1-butyl-5-fluoro-2-oxo-12',12b'-dihydro-5'H-spiro[indoline-3,7'-indolo[3,2-c]phenothiazine]-6'-carboxylate (4g)**: white solid, 56%, m.p. 274 – 276°C; <sup>1</sup>H NMR (400 MHz, DMSO-*d*<sub>6</sub>) δ: 11.68 (s, 1H, NH), 11.46 (s, 1H, NH), 7.43 (d, *J* = 7.6 Hz, 1H, ArH), 7.36 ~ 7.26 (m, 3H, ArH), 7.23 ~ 7.20 (m, 1H, ArH), 7.13 ~ 7.03 (m, 3H, ArH), 6.80 ~ 6.76 (m, 1H, ArH), 6.65 (d, *J* = 8.0 Hz, 1H, ArH), 6.56 ~ 6.53 (m, 1H, ArH), 5.56 (s, 1H, CH), 3.87 ~ 3.76 (m, 2H, CH), 3.38 (s, 3H, OCH<sub>3</sub>), 1.73 ~ 1.65 (m, 2H, CH), 1.48 ~ 1.39 (m, 2H, CH), 0.98 ~ 0.94 (m, 3H, CH<sub>3</sub>); <sup>13</sup>C NMR (101 MHz, DMSO-*d*<sub>6</sub>) δ: 177.6, 169.2, 160.0, 157.6, 150.2, 149.8, 140.2 (d, *J* = 1.0 Hz), 137.5, 137.5, 136.8, 128.3, 127.7, 123.2, 123.2, 122.6, 121.4, 119.8, 119.0, 118.2, 114.4 (d, *J* = 23.2 Hz), 112.3, 110.3 (d, *J* = 24.2 Hz), 109.5 (d, *J* = 8.1 Hz), 107.9, 92.4, 51.7, 51.5, 35.6, 29.8, 20.4, 14.1; IR (KBr) ν: 3180, 2956, 2872, 1687, 1662, 1614, 1586, 1565, 1485, 1456, 1380, 1350, 1250, 1189, 1133, 1054, 1026, 999, 943, 881, 862, 818 cm<sup>-1</sup>; HRMS (ESI) Calcd. for C<sub>31</sub>H<sub>26</sub>FN<sub>3</sub>O<sub>3</sub>S ([M+H]<sup>+</sup>): 562.1571, Found: 562.1566.

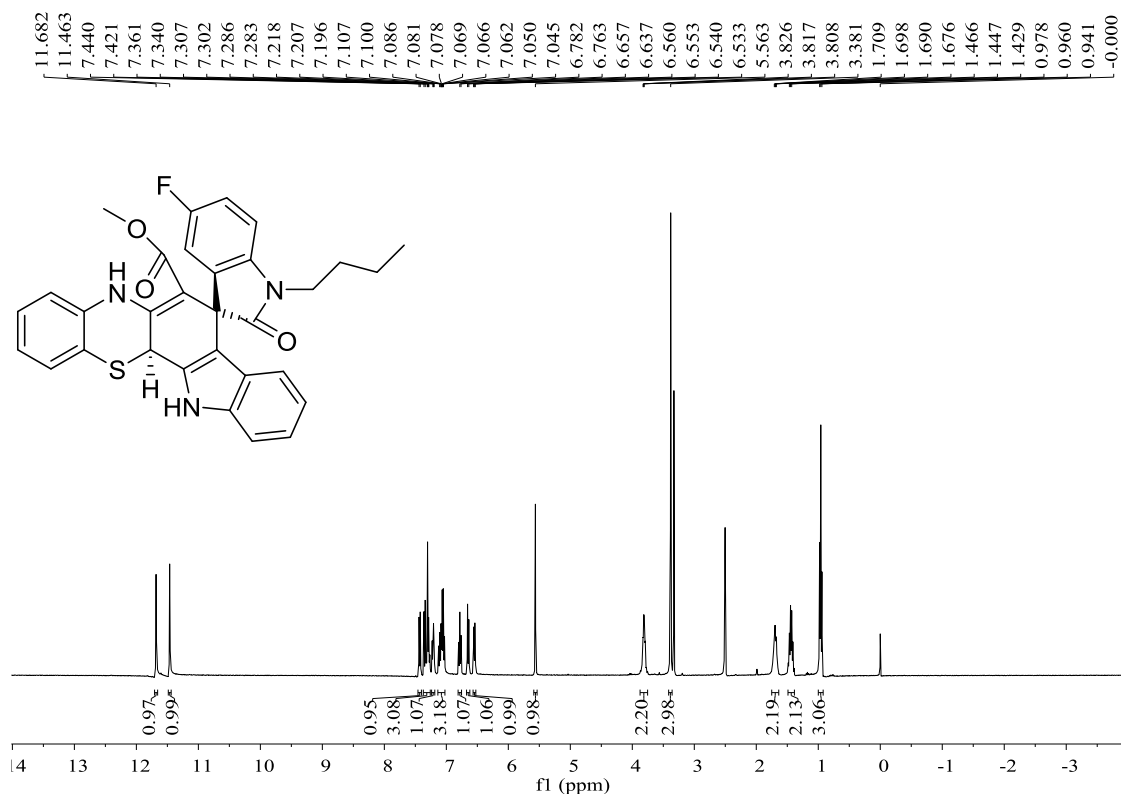

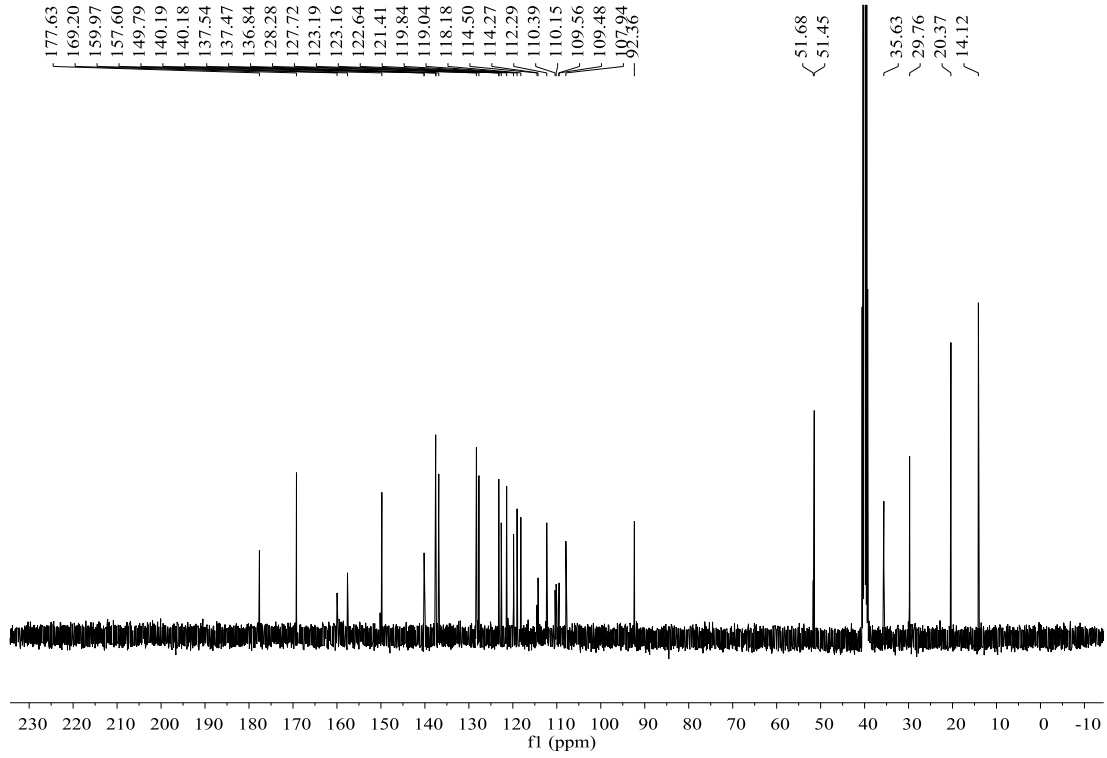

Ph28 #72 RT: 0.92 AV: 1 NL: 5.29E+004  
562.1566  
FTMS+0.753166 [100.0000-1500.0000]  
551533093172030403000

**Ethyl 1-benzyl-2-oxo-12',12b'-dihydro-5'H-spiro[indoline-3,7'-indolo[3,2-c]phenothiazine]-6'-carboxylate (4h)**: white solid, 41%, m.p. 256 – 258°C; <sup>1</sup>H NMR (400 MHz, DMSO-*d*<sub>6</sub>) δ: 11.64 (s, 1H, NH), 11.60 (s, 1H, NH), 7.57 (d, *J* = 6.4 Hz, 2H, ArH), 7.43 (d, *J* = 7.6 Hz, 1H, ArH), 7.38 ~ 7.22 (m, 8H, ArH), 7.08 ~ 7.04 (m, 1H, ArH), 7.00 ~ 6.97 (m, 1H, ArH), 6.88 ~ 6.85 (m, 1H, ArH), 6.76 (d, *J* = 7.2 Hz, 1H, ArH), 6.51 ~ 6.47 (m, 1H, ArH), 6.39 (d, *J* = 8.0 Hz, 1H, ArH), 5.56 (s, 1H, CH), 5.11 (d, *J* = 15.2 Hz, 1H, CH), 4.89 (d, *J* = 15.2 Hz, 1H, CH), 3.94 ~ 3.86 (m, 1H, CH), 3.53 ~ 3.45 (m, 1H, CH), 0.54 ~ 0.50 (m, 3H, CH<sub>3</sub>); <sup>13</sup>C NMR (101 MHz, DMSO-*d*<sub>6</sub>) δ: 178.2, 169.1, 149.8, 143.9, 137.4, 137.0, 136.9, 135.7, 129.4, 128.9, 128.3, 128.1, 127.6, 123.3, 122.9, 122.7, 122.5, 121.4, 119.4, 118.9, 112.0, 109.0, 108.3, 92.8, 59.9, 51.5, 44.4, 35.6, 13.6; IR (KBr)  $\nu$ : 3216, 2982, 2905, 1695, 1654, 1610, 1565, 1481, 1459, 1347, 1243, 1178, 1077, 1048, 1003, 928, 786 cm<sup>-1</sup>; HRMS (ESI) Calcd. for C<sub>35</sub>H<sub>27</sub>N<sub>3</sub>O<sub>3</sub>S ([M+Na]<sup>+</sup>): 592.1665, Found: 592.1661.

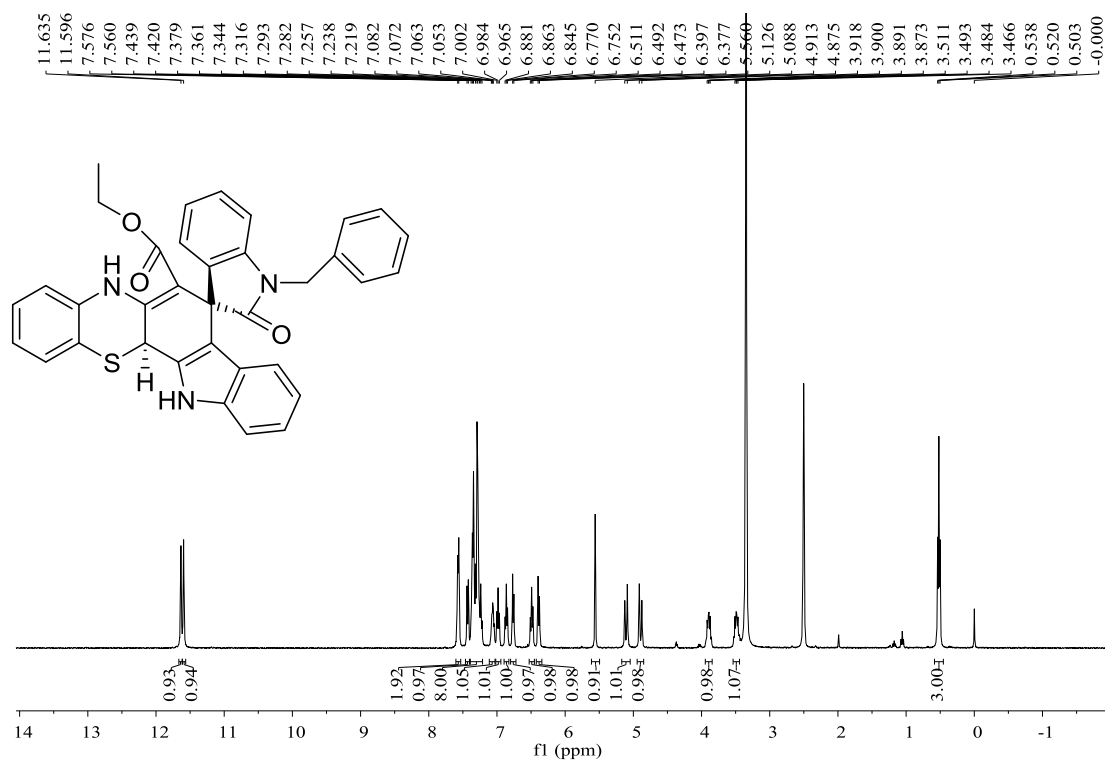



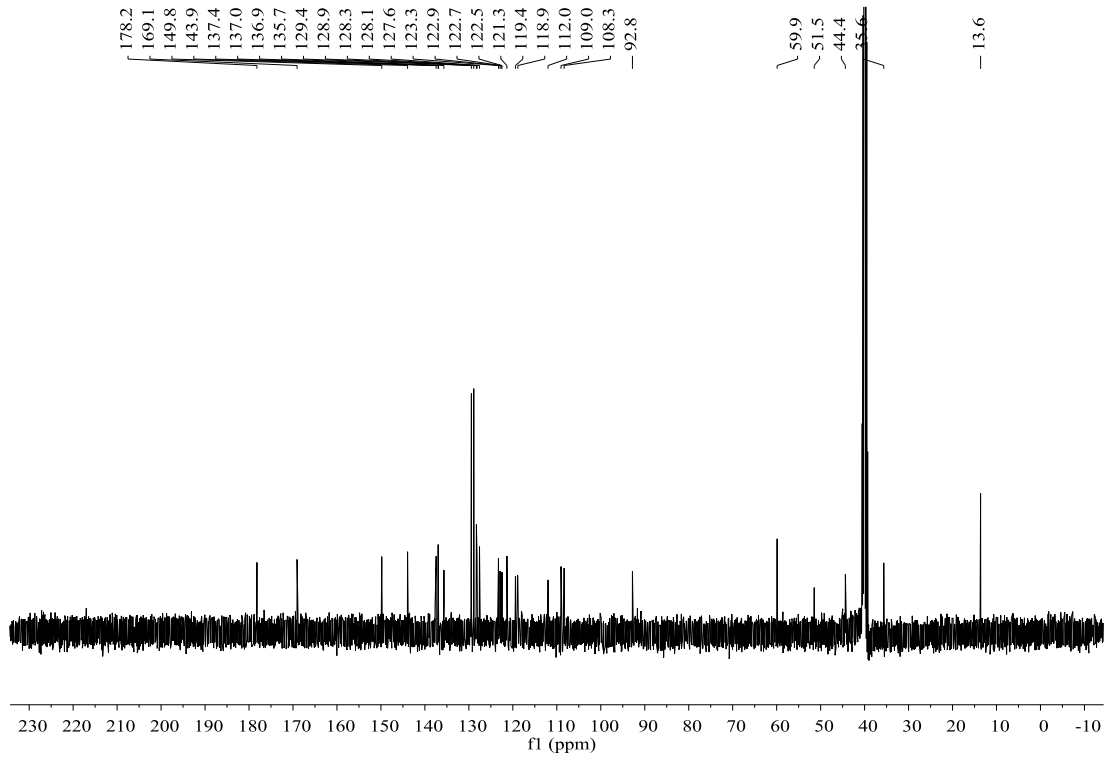

pH29 #73 RT: 0.93 AV: 1 NL: 7.18E+004  
 592.1661  
 57.51 S + 50.7168 (ms [100.0000-1500.0000])  
 50.6689 50.7249 50.8002

**Ethyl 1-benzyl-5-methyl-2-oxo-12',12b'-dihydro-5'H-spiro[indoline-3,7'-indolo[3,2-c]phenothiazine]-6'-carboxylate (4i):** white solid, 35%, m.p. 268 – 270°C; <sup>1</sup>H NMR (400 MHz, DMSO-*d*<sub>6</sub>) δ: 11.61 (s, 1H, NH), 11.59 (s, 1H, NH), 7.57 ~ 7.55 (m, 2H, ArH), 7.43 (d, *J* = 7.6 Hz, 1H, ArH), 7.35 ~ 7.28 (m, 6H, ArH), 7.16 (d, *J* = 8.0 Hz, 1H, ArH), 7.08 ~ 6.97 (m, 3H, ArH), 6.58 ~ 6.40 (m, 3H, ArH), 5.55 (s, 1H, CH), 5.09 (d, *J* = 10.8 Hz, 1H, CH), 4.85 (d, *J* = 10.8 Hz, 1H, CH), 3.93 ~ 3.85 (m, 1H, CH), 3.58 ~ 3.50 (m, 1H, CH), 2.09 (s, 3H, CH<sub>3</sub>), 0.59 ~ 0.55 (m, 3H, CH<sub>3</sub>); <sup>13</sup>C NMR (101 MHz, DMSO-*d*<sub>6</sub>) δ: 178.1, 169.1, 149.7, 141.6, 137.5, 137.1, 136.9, 135.7, 131.7, 129.4, 128.9, 128.3, 128.1, 127.5, 123.3, 123.3, 123.0, 122.5, 121.3, 119.4, 119.0, 118.9, 112.0, 108.8, 108.5, 93.0, 59.9, 51.52, 44.4, 35.7, 21.0, 13.7; IR (KBr) ν: 3174, 2978, 2889, 1692, 1654, 1608, 1566, 1490, 1460, 1375, 1339, 1250, 1179, 1087, 1044, 928, 840, 805, 781 cm<sup>-1</sup>; HRMS (ESI) Calcd. for C<sub>36</sub>H<sub>29</sub>N<sub>3</sub>O<sub>3</sub>S ([M+Na]<sup>+</sup>): 606.1822, Found: 606.1819.

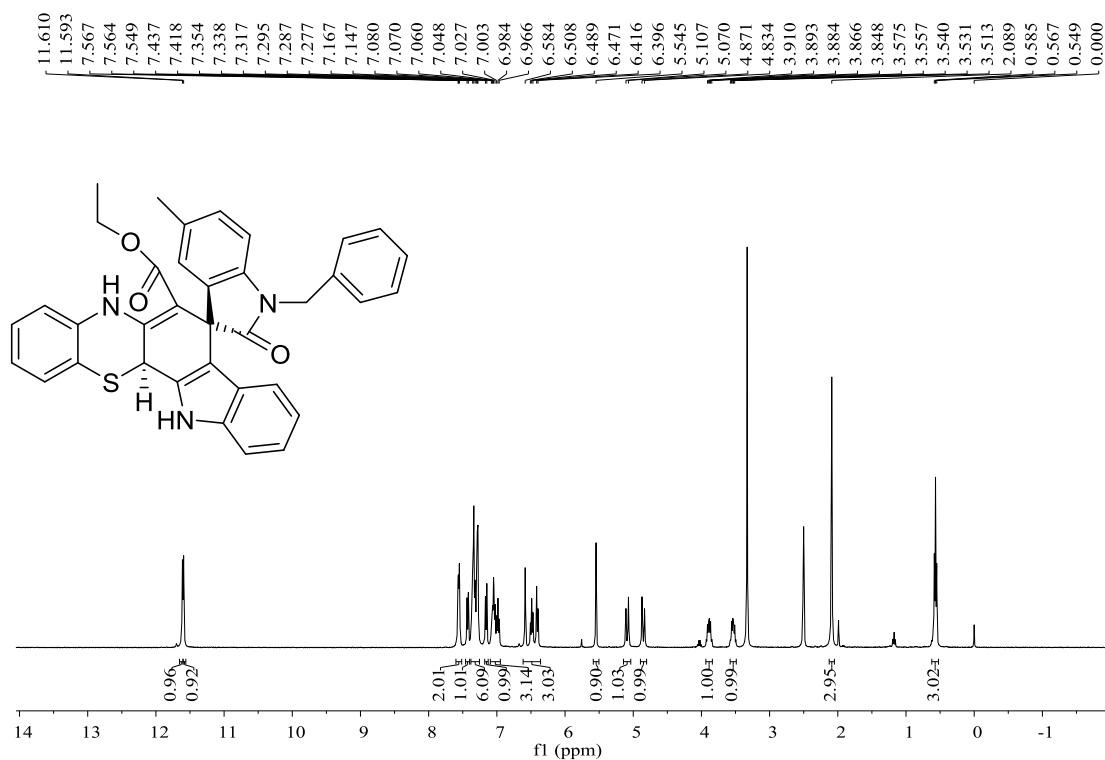

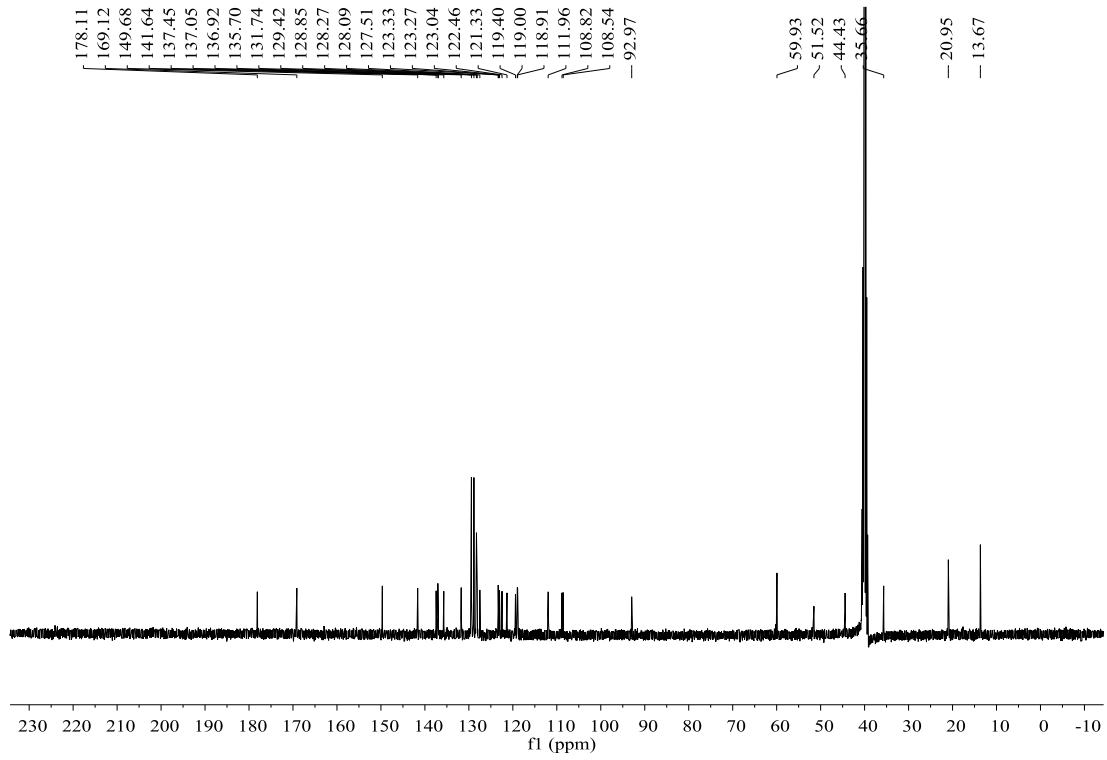

ph30 #63 RT: 0.80 AV: 1 NL: 7.28E+004  
606.1819  
1.5716  
5.5920

**Ethyl 1-benzyl-5-chloro-2-oxo-12',12b'-dihydro-5'H-spiro[indoline-3,7'-indolo[3,2-c]phenothiazine]-6'-carboxylate (4j)**: white solid, 42%, m.p. 320 – 322°C; <sup>1</sup>H NMR (400 MHz, DMSO-*d*<sub>6</sub>) δ: 11.72 (s, 1H, NH), 11.62 (s, 1H, NH), 7.57 ~ 7.55 (m, 2H, ArH), 7.44 (d, *J* = 7.2 Hz, 1H, ArH), 7.39 ~ 7.34 (m, 5H, ArH), 7.32 ~ 7.27 (m, 3H, ArH), 7.10 ~ 7.06 (m, 1H, ArH), 7.03 ~ 6.99 (m, 1H, ArH), 6.70 (s, 1H, ArH), 6.54 ~ 6.50 (m, 1H, ArH), 6.37 (d, *J* = 8.4 Hz, 1H, ArH), 5.60 (s, 1H, CH), 5.12 (d, *J* = 14.8 Hz, 1H, CH), 4.92 (d, *J* = 14.8 Hz, 1H, CH), 3.98 ~ 3.90 (m, 1H, CH), 3.58 ~ 3.50 (m, 1H, CH), 0.60 ~ 0.56 (m, 3H, CH<sub>3</sub>); <sup>13</sup>C NMR (101 MHz, DMSO-*d*<sub>6</sub>) δ: 177.8, 168.8, 150.2, 142.9, 137.9, 137.4, 136.8, 136.6, 129.5, 129.0, 128.3, 128.0, 127.8, 126.8, 123.8, 123.3, 123.0, 122.7, 121.4, 119.7, 119.0, 118.5, 112.2, 110.6, 110.0, 107.5, 91.9, 60.1, 51.6, 44.4, 35.5, 13.7; IR (KBr) ν: 3186, 2986, 2876, 1698, 1654, 1610, 1566, 1525, 1482, 1426, 1336, 1175, 1044, 893 cm<sup>-1</sup>; HRMS (ESI) Calcd. for C<sub>35</sub>H<sub>26</sub>ClN<sub>3</sub>O<sub>3</sub>S ([M+Na]<sup>+</sup>): 626.1276, Found: 626.1271.

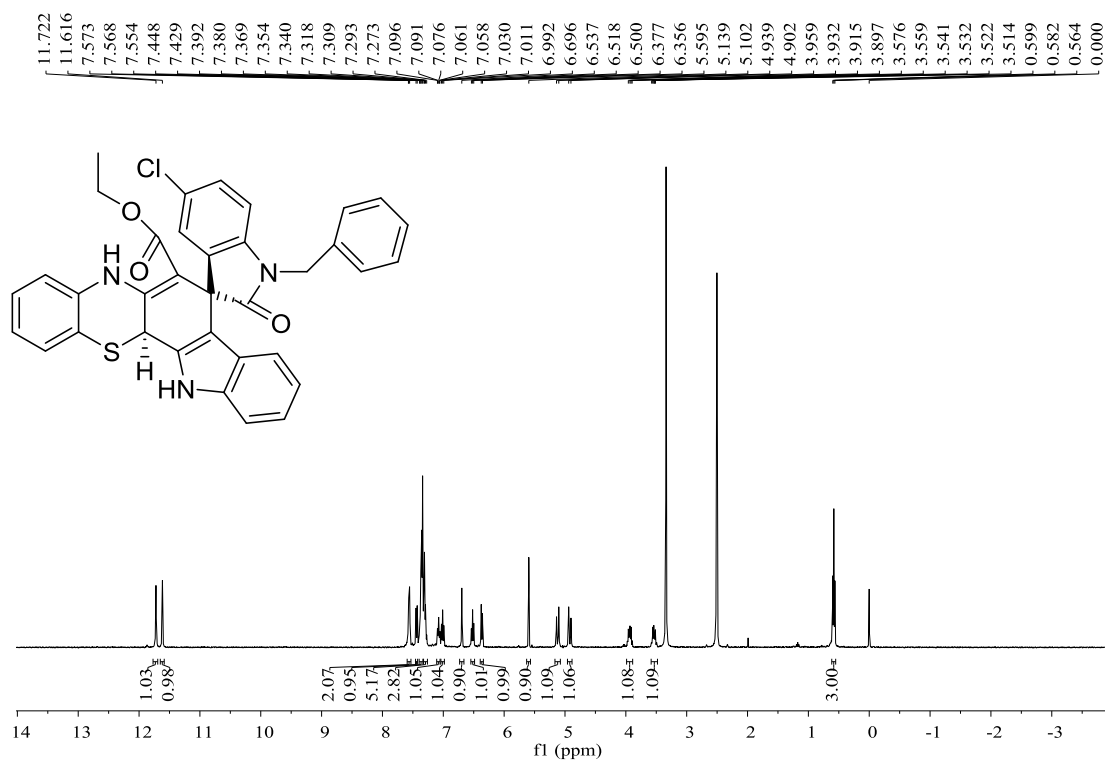

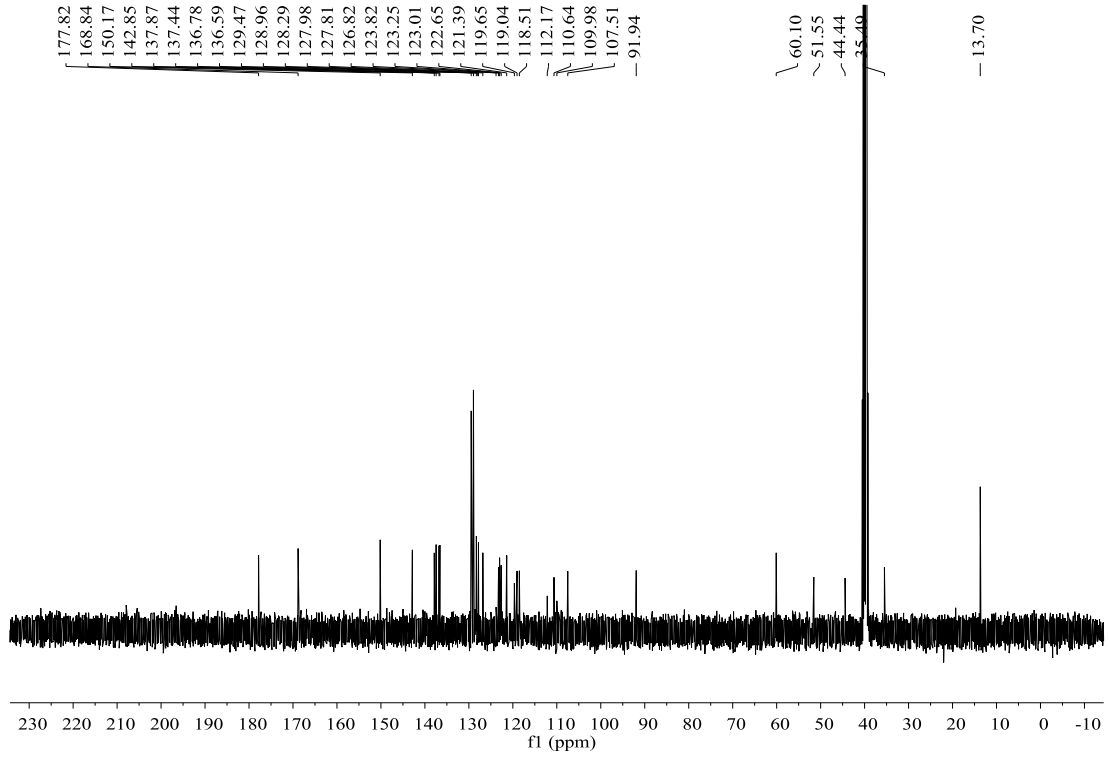

ph31 #70 RT: 0.89 AV: 1 NL: 2.81E+004  
 1 ETMS: 626.1271  
 6 100.0000-1500.0000  
 6 100.0000-1500.0000

**Ethyl 1-benzyl-5-fluoro-2-oxo-12',12b'-dihydro-5'H-spiro[indoline-3,7'-indolo[3,2-c]phenothiazine]-6'-carboxylate (4k)**: white solid, 48%, m.p. 254 – 257°C; <sup>1</sup>H NMR (400 MHz, DMSO-*d*<sub>6</sub>) δ: 11.71 (s, 1H, NH), 11.63 (s, 1H, NH), 7.57 ~ 7.55 (m, 2H, ArH), 7.44 (d, *J* = 7.6 Hz, 1H, ArH), 7.36 ~ 7.35 (m, 3H, ArH), 7.32 ~ 7.27 (m, 2H, ArH), 7.13 ~ 7.05 (m, 2H, ArH), 7.03 ~ 6.99 (m, 1H, ArH), 6.58 ~ 6.51 (m, 2H, ArH), 6.38 (d, *J* = 8.0 Hz, 1H, ArH), 5.59 (s, 1H, CH), 5.11 (d, *J* = 15.2 Hz, 1H, CH), 4.91 (d, *J* = 15.2 Hz, 1H, CH), 3.98 ~ 3.90 (m, 1H, CH), 3.56 ~ 3.48 (m, 1H, CH), 0.57 ~ 0.54 (m, 3H, CH<sub>3</sub>); <sup>13</sup>C NMR (101 MHz, DMSO-*d*<sub>6</sub>) δ: 178.0, 168.9, 129.0 (d, *J* = 240.4 Hz), 150.2, 140.2, 137.7 (d, *J* = 8.1 Hz), 137.5, 136.8, 136.8, 129.4, 128.9, 128.3, 128.2, 127.8, 123.2, 123.1, 122.6, 121.4, 119.6, 119.0, 118.6, 114.2 (d, *J* = 24.2 Hz), 112.1, 110.4 (d, *J* = 24.2 Hz), 109.9 (d, *J* = 8.1 Hz), 107.6, 92.1, 60.0, 51.8, 44.5, 35.5, 13.7; IR (KBr) ν: 3225, 3062, 2985, 1697, 1654, 1612, 1587, 1566, 1484, 1451, 1330, 1242, 1167, 1043, 928, 865, 810, 778 cm<sup>-1</sup>; HRMS (ESI) Calcd. for C<sub>35</sub>H<sub>26</sub>FN<sub>3</sub>O<sub>3</sub>S ([M+Na]<sup>+</sup>): 610.1571, Found: 610.1566.

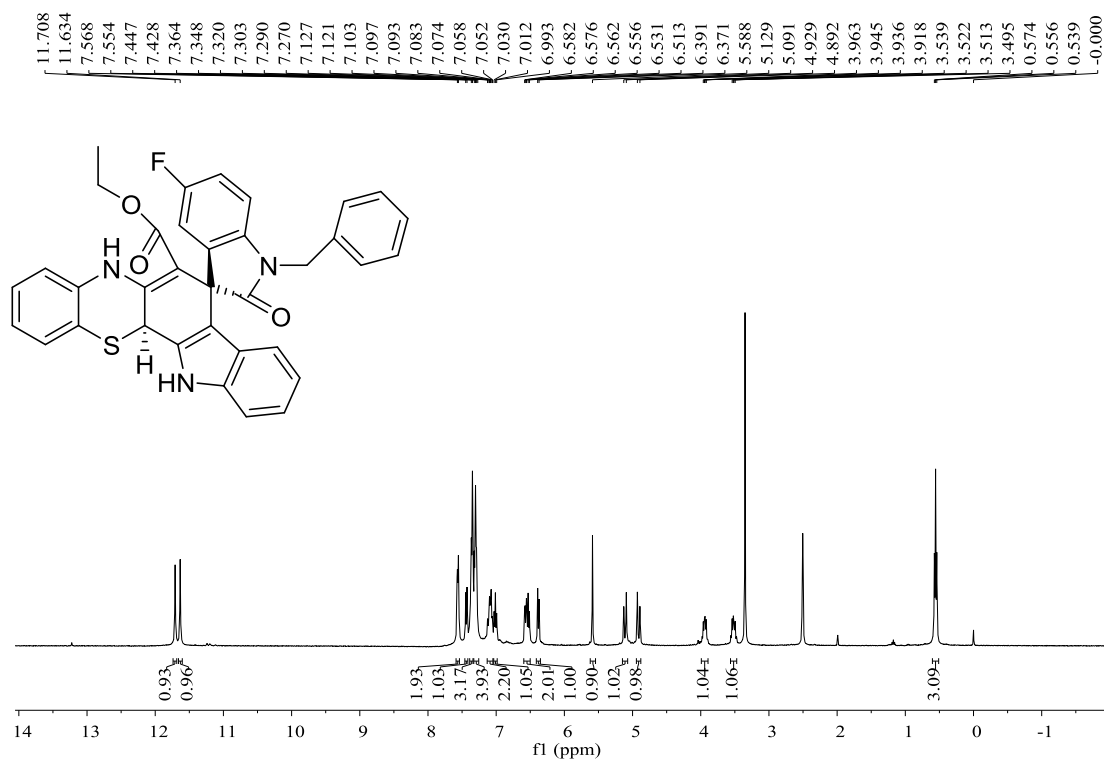

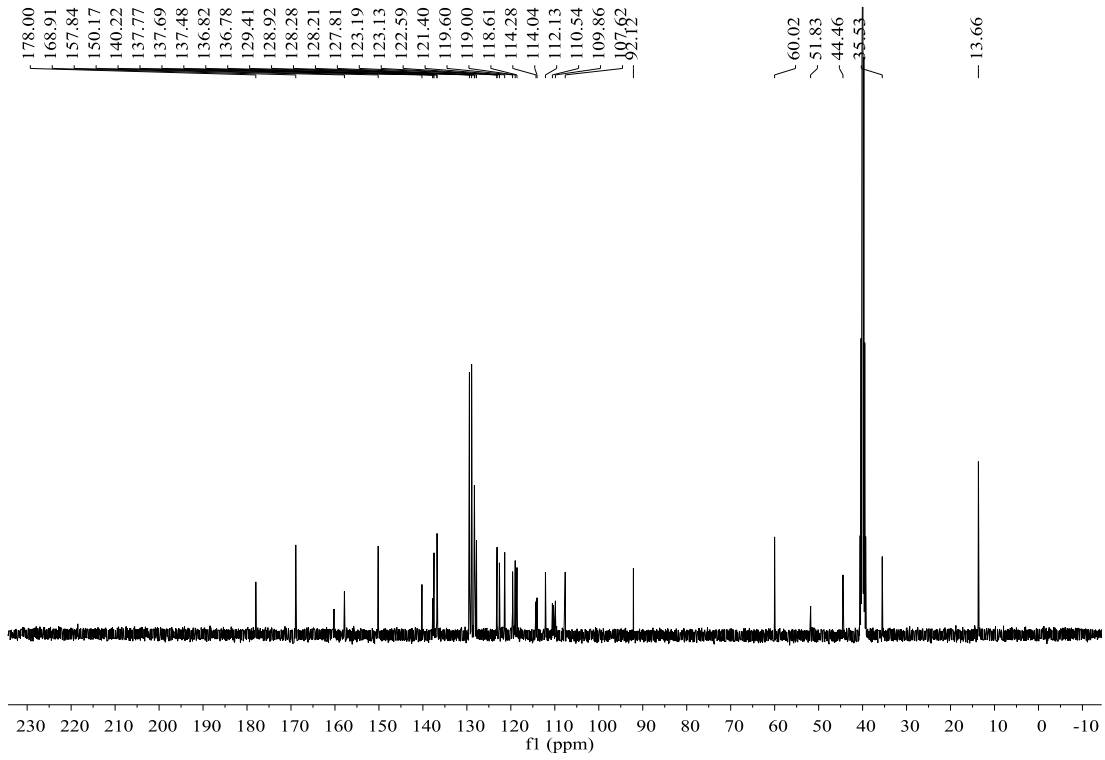

ph32 #52 RT: 0.66 AV: 1 NL: 3.98E+04  
610.1566  
[100.0000-1500.0000]  
1.640 1.500  
0.216 0.111 0.052 0.12 0.041 0

**Ethyl 1-butyl-5-methyl-2-oxo-12',12b'-dihydro-5'H-spiro[indoline-3,7'-indolo[3,2-c]phenothiazine]-6'-carboxylate (4I)**: white solid, 33%, m.p. 250 – 252°C; <sup>1</sup>H NMR (400 MHz, DMSO-*d*<sub>6</sub>) δ: 11.62 (s, 1H, NH), 11.58 (s, 1H, NH), 7.43 (d, *J* = 7.6 Hz, 1H, ArH), 7.33 (d, *J* = 8.0 Hz, 1H, ArH), 7.28 (d, *J* = 3.6 Hz, 1H, ArH), 7.08 ~ 7.01 (m, 4H, ArH), 6.77 ~ 6.69 (m, 2H, ArH), 6.59 (s, 1H, ArH), 5.53 (s, 1H, CH), 3.94 ~ 3.74 (m, 3H, CH), 3.67 ~ 3.60 (m, 1H, CH), 2.12 (s, 3H, CH<sub>3</sub>), 1.77 ~ 1.64 (m, 2H, CH), 1.46 ~ 1.37 (m, 2H, CH), 0.95 ~ 0.91 (m, 3H, CH<sub>3</sub>), 0.76 ~ 0.73 (m, 3H, CH<sub>3</sub>); <sup>13</sup>C NMR (101 MHz, DMSO-*d*<sub>6</sub>) δ: 177.8, 169.1, 149.6, 142.0, 137.5, 136.9, 135.7, 131.5, 128.4, 128.3, 127.5, 123.4, 123.2, 123.0, 122.5, 121.3, 119.5, 118.9, 118.7, 112.1, 108.6, 108.3, 93.0, 60.0, 51.5, 35.7, 30.1, 21.0, 20.5, 14.1, 13.9; IR (KBr) ν: 3207, 2959, 2934, 2868, 1694, 1655, 1609, 1589, 1564, 1487, 1348, 1236, 1199, 1134, 1053, 1009, 928, 888, 810 cm<sup>-1</sup>; HRMS (ESI) Calcd. for C<sub>33</sub>H<sub>31</sub>N<sub>3</sub>O<sub>3</sub>S ([M+Na]<sup>+</sup>): 572.1978, Found: 572.1974.

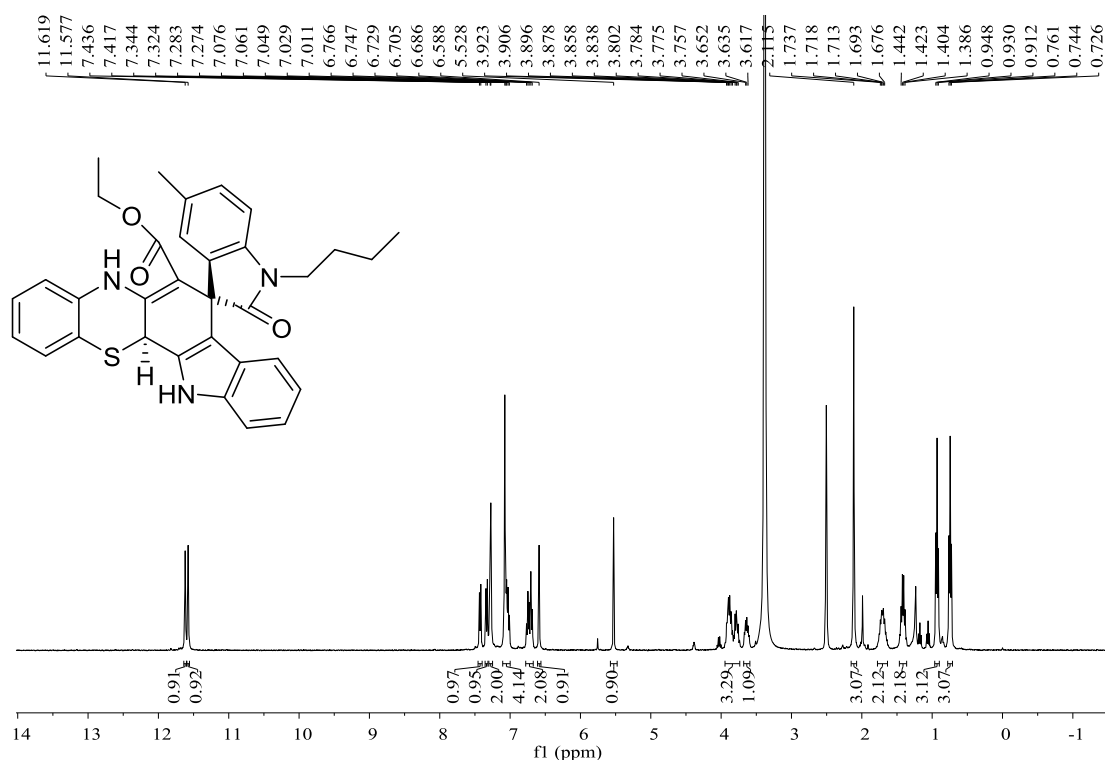



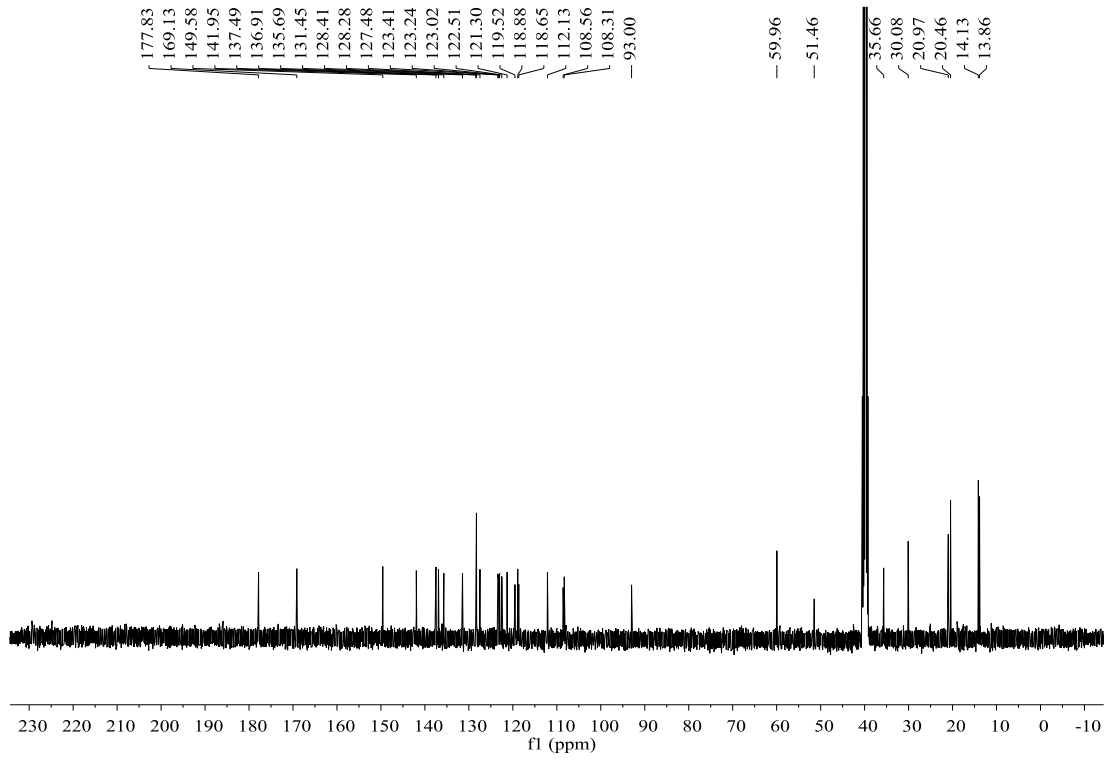

pln33 #81 RT: 1.03 AV: 1 NL: 5.49E+004  
 572.1974  
 657.02 672.0000 [100.0000-1500.0000]  
 656.6667 671.8778 678.0000 682

**Ethyl 1-butyl-5-chloro-2-oxo-12',12b'-dihydro-5'H-spiro[indoline-3,7'-indolo[3,2-c]phenothiazine]-6'-carboxylate (4m):** white solid, 40%, m.p. 267 – 269°C; <sup>1</sup>H NMR (400 MHz, DMSO-*d*<sub>6</sub>) δ: 11.72 (s, 1H, NH), 11.60 (s, 1H, NH), 7.44 (d, *J* = 7.6 Hz, 1H, ArH), 7.37 ~ 7.35 (m, 2H, ArH), 7.32 ~ 7.25 (m, 3H, ArH), 7.09 ~ 7.04 (m, 2H, ArH), 6.81 ~ 6.77 (m, 1H, ArH), 6.71 ~ 6.66 (m, 2H, ArH), 5.58 (s, 1H, CH), 4.00 ~ 3.87 (m, 2H, CH), 3.85 ~ 3.77 (m, 1H, CH), 3.72 ~ 3.65 (m, 1H, CH), 1.77 ~ 1.62 (m, 2H, CH), 1.46 ~ 1.37 (m, 2H, CH), 0.95 ~ 0.91 (m, 3H, CH<sub>3</sub>), 0.79 ~ 0.76 (m, 3H, CH<sub>3</sub>); <sup>13</sup>C NMR (101 MHz, DMSO-*d*<sub>6</sub>) δ: 177.5, 168.8, 150.1, 143.2, 137.9, 137.5, 136.8, 128.3, 128.1, 127.8, 126.5, 123.2, 123.1, 122.7, 122.5, 121.4, 119.8, 119.0, 118.2, 112.3, 110.2, 107.5, 92.0, 60.1, 51.5, 35.5, 30.0, 20.4, 14.1, 13.9; IR (KBr) ν: 3181, 2961, 2933, 2870, 1698, 1658, 1590, 1566, 1479, 1425, 1345, 1242, 1183, 1139, 1105, 1053, 928, 880, 804 cm<sup>-1</sup>; HRMS (ESI) Calcd. for C<sub>32</sub>H<sub>28</sub>ClN<sub>3</sub>O<sub>3</sub>S ([M+Na]<sup>+</sup>): 592.1432, Found: 592.1426.

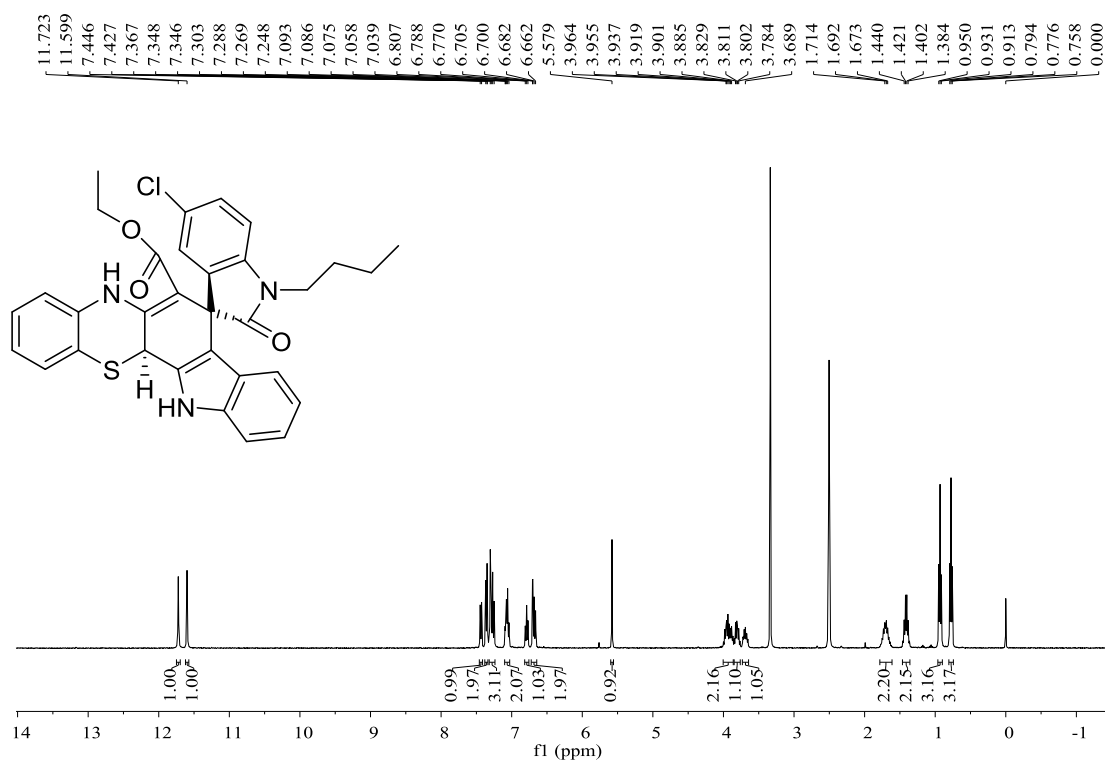



**Ethyl 1-butyl-5-fluoro-2-oxo-12',12b'-dihydro-5'H-spiro[indoline-3,7'-indolo[3,2-c]phenothiazine]-6'-carboxylate (4n)**: white solid, 50%, m.p. 272 – 274°C; <sup>1</sup>H NMR (400 MHz, DMSO-*d*<sub>6</sub>) δ: 11.68 (s, 1H, NH), 11.60 (s, 1H, NH), 7.43 (d, *J* = 7.6 Hz, 1H, ArH), 7.35 (d, *J* = 8.4 Hz, 1H, ArH), 7.29 (d, *J* = 3.6 Hz, 2H, ArH), 7.24 ~ 7.21 (m, 1H, ArH), 7.15 ~ 7.03 (m, 3H, ArH), 6.80 ~ 6.76 (m, 1H, ArH), 6.66 (d, *J* = 8.0 Hz, 1H, ArH), 6.58 ~ 6.56 (m, 1H, ArH), 5.56 (s, 1H, CH), 4.06 ~ 3.86 (m, 2H, CH), 3.83 ~ 3.75 (m, 1H, CH), 3.71 ~ 3.64 (m, 1H, CH), 1.79 ~ 1.62 (m, 2H, CH), 1.45 ~ 1.36 (m, 2H, CH), 0.95 ~ 0.91 (m, 3H, CH<sub>3</sub>), 0.78 ~ 0.74 (m, 3H, CH<sub>3</sub>); <sup>13</sup>C NMR (101 MHz, DMSO-*d*<sub>6</sub>) δ: 177.7, 168.9, 158.9 (d, *J* = 239.4 Hz), 150.1, 140.5 (d, *J* = 1.0 Hz), 137.7 (d, *J* = 7.1 Hz), 137.5, 136.8, 128.3, 127.8, 123.2, 122.6, 121.4, 119.7, 119.0, 118.3, 114.3 (d, *J* = 23.2 Hz), 112.3, 110.4 (d, *J* = 24.2 Hz), 109.5 (d, *J* = 8.1 Hz), 107.6, 92.2, 60.0, 51.8, 35.5, 30.0, 20.4, 14.1, 13.9.; IR (KBr) ν: 3172, 2958, 2926, 2871, 1691, 1654, 1612, 1586, 1565, 1485, 1454, 1348, 1251, 1185, 1132, 1052, 933, 865, 817, 763 cm<sup>-1</sup>; HRMS (ESI) Calcd. for C<sub>32</sub>H<sub>28</sub>FN<sub>3</sub>O<sub>3</sub>S ([M+Na]<sup>+</sup>): 576.1728, Found: 576.1721.

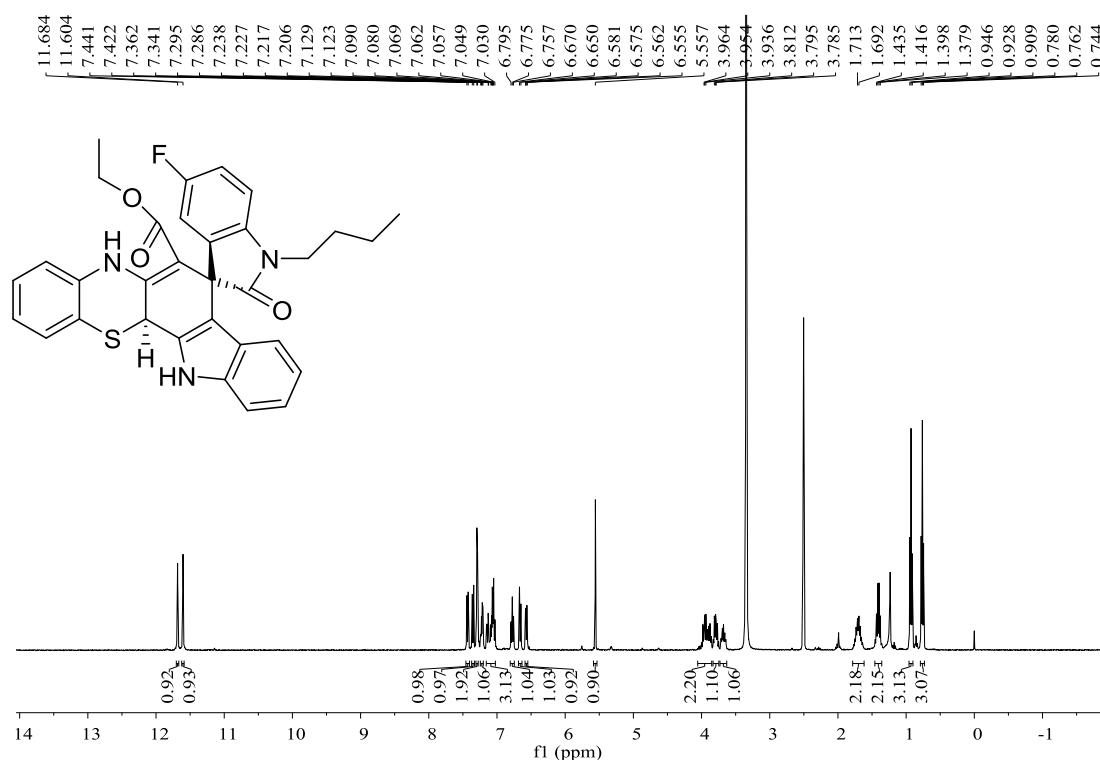

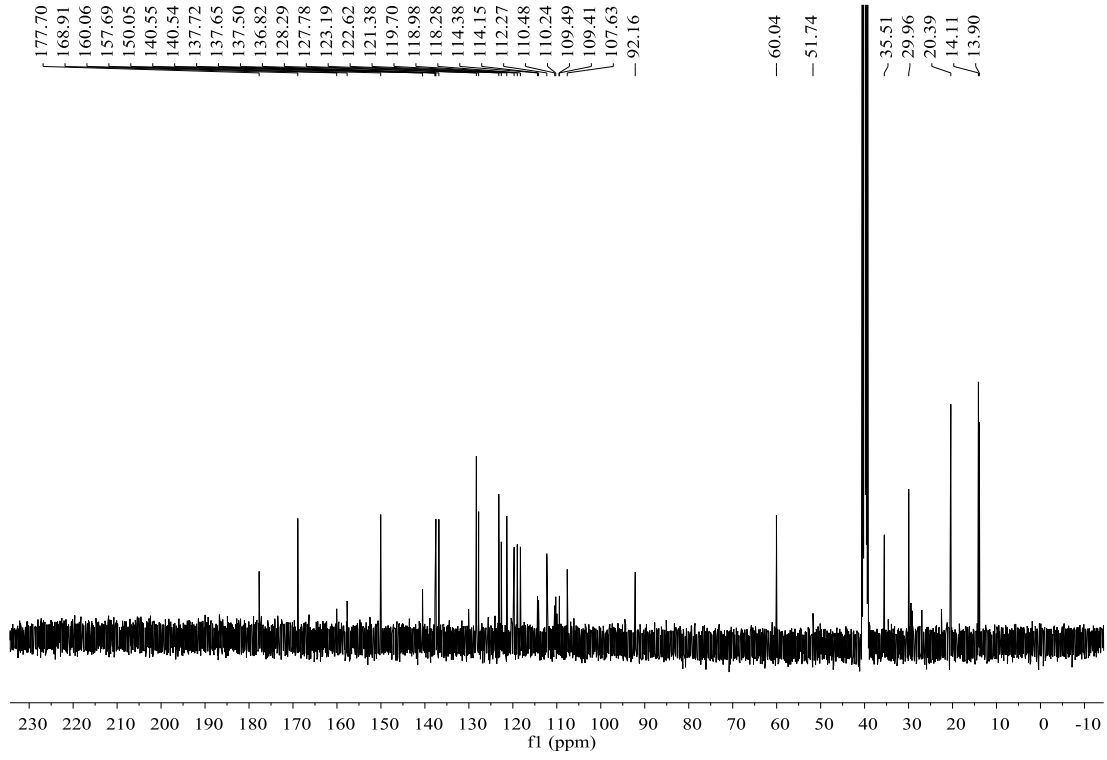

plh35 #82 RT: 1.04 AV: 1 NL: 3.25E+004  
 FTMS: 576.1724  
 3066879729\_112\_0308209368

**Methyl 7-(2-((ethoxycarbonyl)amino)phenyl)-5,12-dihydroindolo[3,2-c]phenothiazine-6-carboxylate (5a):** yellow solid, 59%, m.p. 215 – 217°C; <sup>1</sup>H NMR (400 MHz, CDCl<sub>3</sub>) δ: 9.49 (s, 1H, NH), 8.20 (s, 2H, [NH]2), 7.50 ~ 7.45 (m, 1H, ArH), 7.33 ~ 7.24 (m, 2H, ArH), 7.18 ~ 7.14 (m, 1H, ArH), 7.11 ~ 7.08 (m, 2H, ArH), 7.05 ~ 7.03 (m, 1H, ArH), 6.95 ~ 6.87 (m, 2H, ArH), 6.76 ~ 6.74 (m, 1H, ArH), 6.44 (d, *J* = 8.0 Hz, 1H, ArH), 6.31 (s, 1H, ArH), 4.06 ~ 3.98 (m, 2H, CH), 3.44 (s, 3H, OCH<sub>3</sub>), 1.12 ~ 1.09 (m, 3H, CH<sub>3</sub>); <sup>13</sup>C NMR (101 MHz, CDCl<sub>3</sub>) δ: 169.3, 153.6, 143.6, 141.8, 139.9, 138.9, 135.6, 132.7, 128.5, 128.3, 128.0, 126.9, 126.0, 123.4, 123.4, 123.4, 121.4, 120.9, 117.9, 116.4, 116.2, 110.5, 108.5, 98.8, 61.1, 51.7, 14.3; IR (KBr) ν: 3412, 3315, 3059, 2978, 2947, 1718, 1678, 1582, 1528, 1489, 1458, 1383, 1341, 1316, 1287, 1227, 1161, 1112, 1064, 978, 880, 801 cm<sup>-1</sup>; HRMS (ESI) Calcd. for C<sub>29</sub>H<sub>23</sub>N<sub>3</sub>O<sub>4</sub>S ([M+Na]<sup>+</sup>): 532.1301, Found: 532.1292.

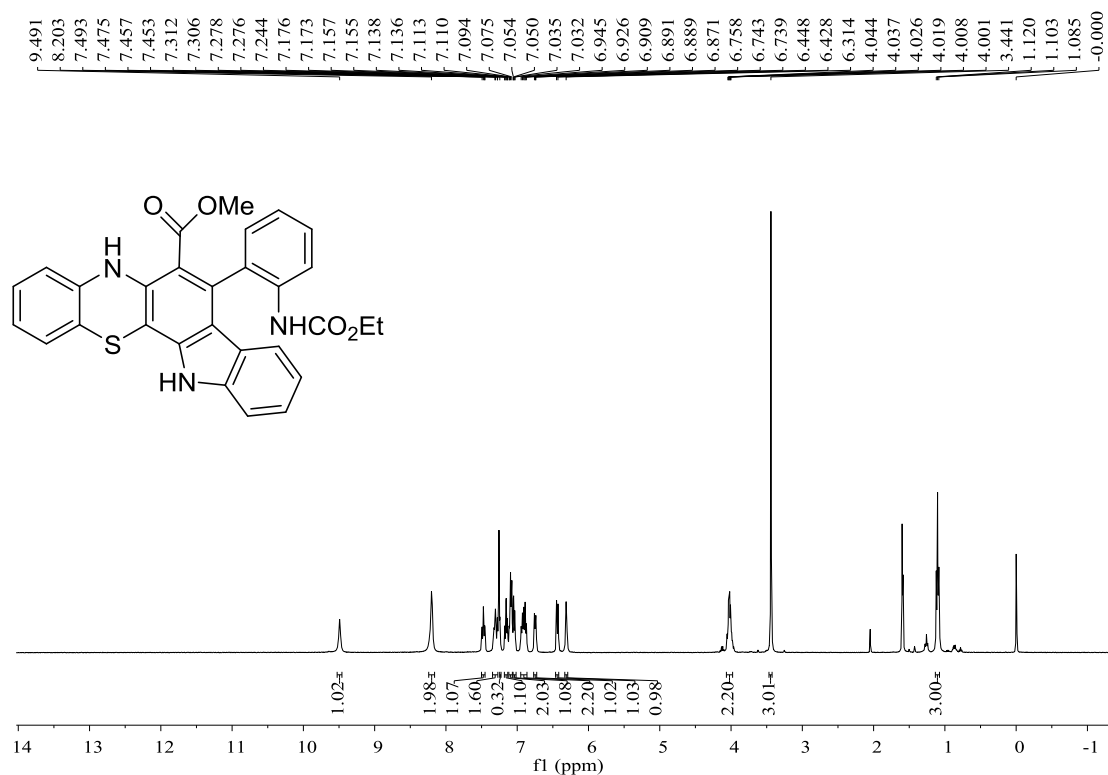

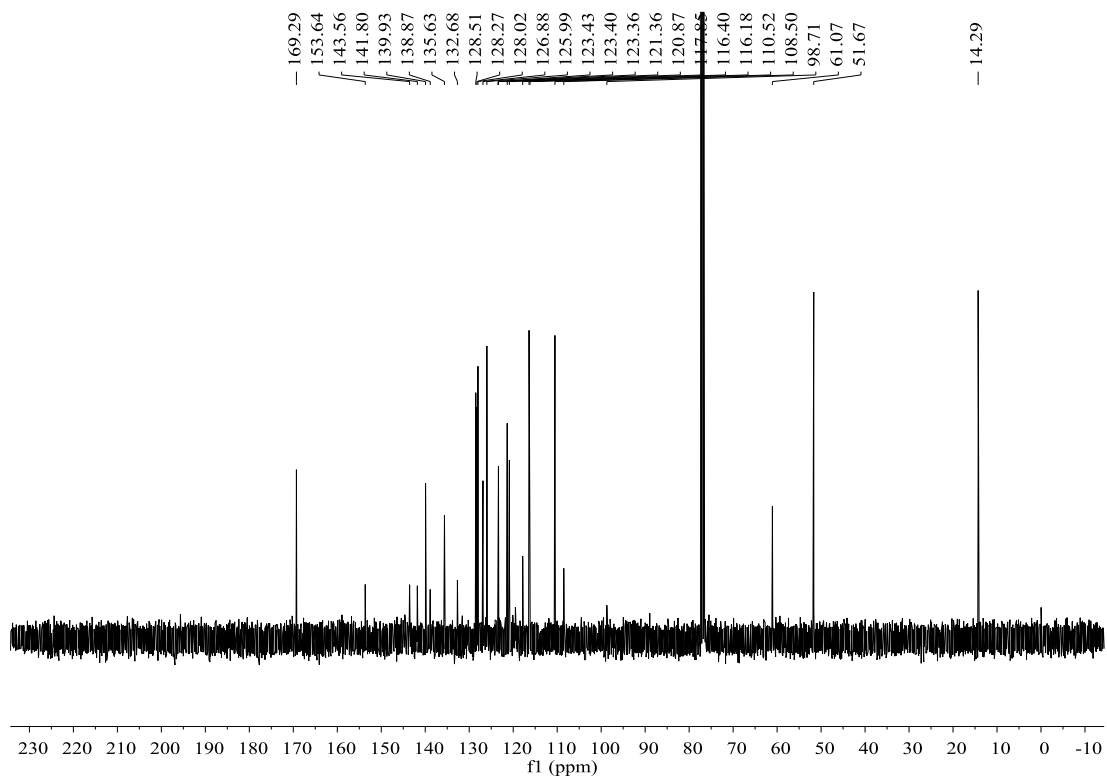

ph13 #81 RT: 1.03 AV: 1 NL: 3.56E+005  
 532.1292  
 FTMS + 0.750000000 [100.0000-1500.0000]  
 5282.5313 5282.5313 5282.5313

**Methyl 7-(2-((ethoxycarbonyl)amino)-5-methylphenyl)-5,12-dihydroindolo[3,2-c]phenothiazine-6-carboxylate (5b):** yellow solid, 46%, m.p. 221 – 223°C; <sup>1</sup>H NMR (400 MHz, CDCl<sub>3</sub>) δ: 9.44 (s, 1H, NH), 8.18 (s, 1H, NH), 8.08 ~ 8.05 (m, 1H, NH), 7.33 (d, *J* = 8.0 Hz, 1H, ArH), 7.28 ~ 7.25 (m, 2H, ArH), 7.11 ~ 7.08 (m, 2H, ArH), 6.95 ~ 6.89 (m, 2H, ArH), 6.85 (d, *J* = 1.6 Hz, 1H, ArH), 6.75 (d, *J* = 8.0 Hz, 1H, ArH), 6.49 (d, *J* = 8.0 Hz, 1H, ArH), 6.23 (s, 1H, ArH), 4.05 ~ 3.97 (m, 2H, CH), 3.46 (s, 3H, OCH<sub>3</sub>), 2.31 (s, 3H, CH<sub>3</sub>), 1.11 ~ 1.07 (m, 3H, CH<sub>3</sub>); <sup>13</sup>C NMR (101 MHz, CDCl<sub>3</sub>) δ: 169.4, 143.3, 141.8, 140.0, 138.8, 133.1, 133.0, 129.0, 128.6, 128.0, 126.8, 125.9, 123.4, 123.3, 121.4, 120.8, 117.8, 116.4, 116.2, 110.5, 108.6, 98.5, 61.0, 51.7, 20.8, 14.3; IR (KBr) ν: 3414, 3290, 3060, 2973, 2947, 1712, 1680, 1603, 1574.87 1525.58 1490.68 1384, 1338.89 1289.68 1228, 1116, 1058, 977, 880, 842, 814 cm<sup>-1</sup>; HRMS (ESI) Calcd. for C<sub>30</sub>H<sub>25</sub>N<sub>3</sub>O<sub>4</sub>S ([M+Na]<sup>+</sup>): 546.1458, Found: 546.1453.

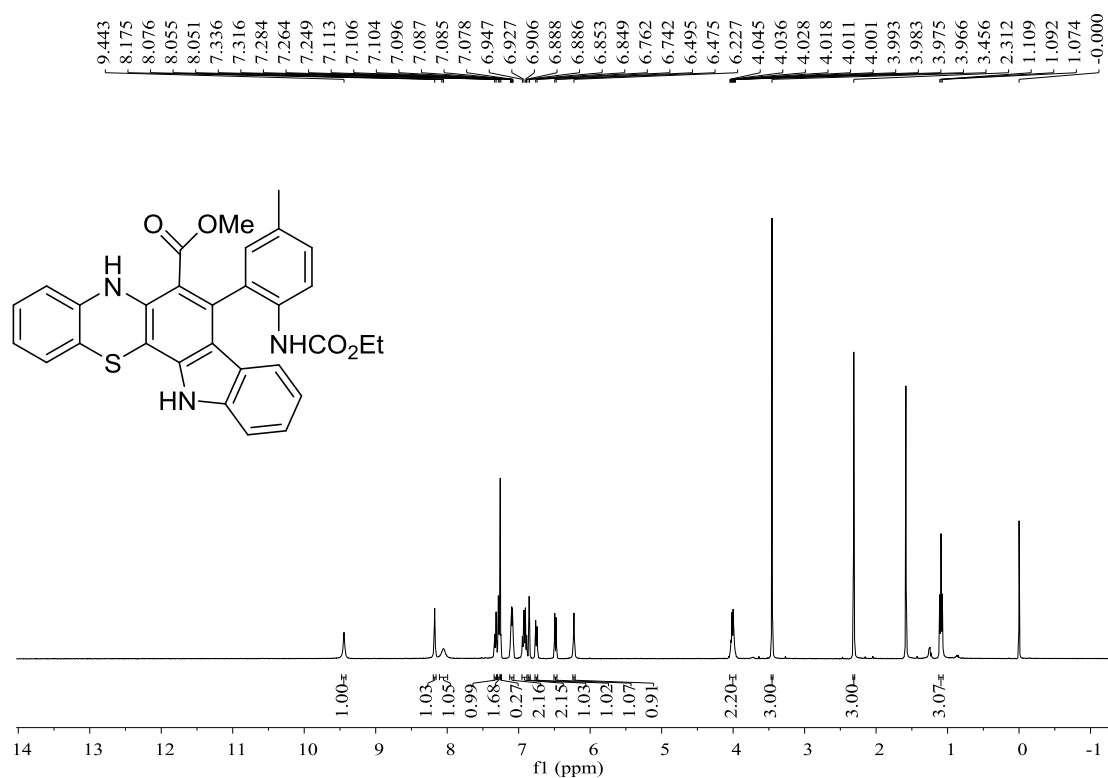



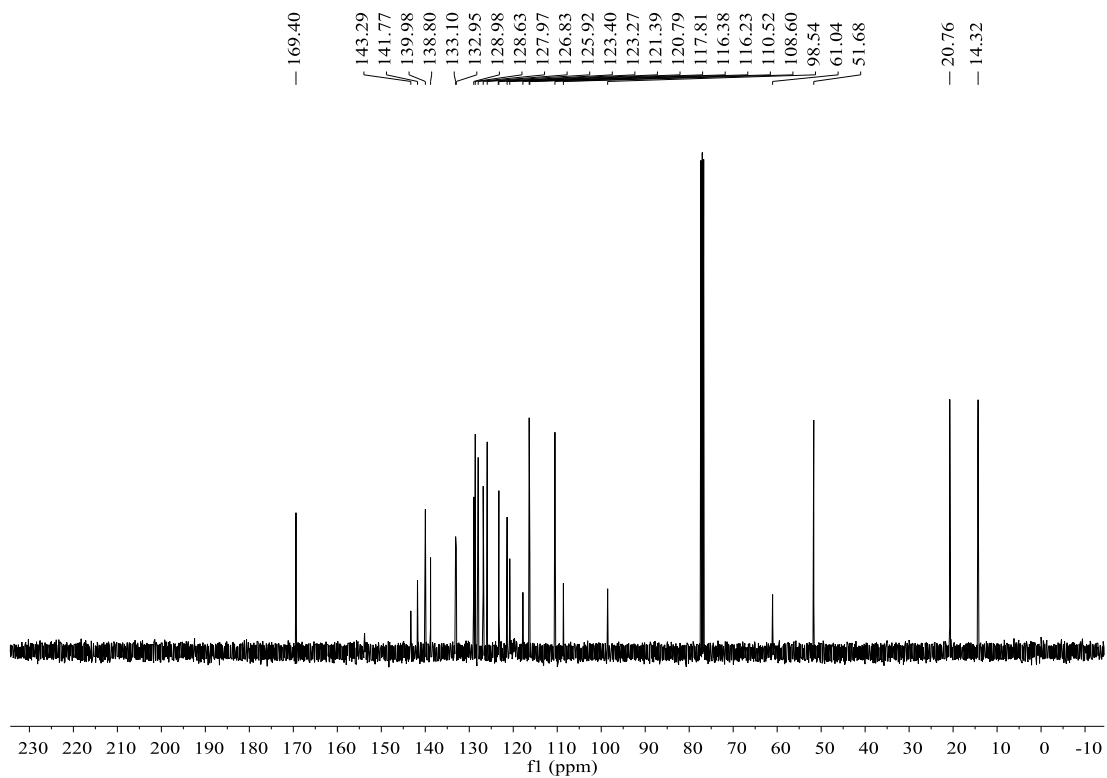

plh14 #54 RT: 0.69 AV: 1 NL: 3.71E+005  
 546.1453  
 [LETMS: 5.00-1500.0000-1500.0000]  
 544.363356112.577317980.0

**Methyl 7-(5-chloro-2-((ethoxycarbonyl)amino)phenyl)-5,12-dihydroindolo[3,2-c]phenothiazine-6-carboxylate (5c):** yellow solid, 56%, m.p. 182 – 184°C; <sup>1</sup>H NMR (400 MHz, CDCl<sub>3</sub>) δ: 9.62 (s, 1H, NH), 8.18 (s, 2H, [NH]2), 7.47 ~ 7.44 (m, 1H, ArH), 7.36 (d, *J* = 8.0 Hz, 1H, ArH), 7.33 ~ 7.26 (m, 2H, ArH), 7.13 ~ 7.07 (m, 3H, ArH), 6.96 (t, *J* = 7.6 Hz, 1H, ArH), 6.77 (d, *J* = 8.0 Hz, 1H, ArH), 6.49 (d, *J* = 8.0 Hz, 1H, ArH), 6.26 (s, 1H, ArH), 4.06 ~ 3.98 (m, 2H, CH), 3.50 (s, 3H, OCH<sub>3</sub>), 1.12 ~ 1.09 (m, 3H, CH<sub>3</sub>); <sup>13</sup>C NMR (101 MHz, CDCl<sub>3</sub>) δ: 168.9, 153.5, 143.8, 141.6, 140.0, 139.0, 134.5, 131.0, 128.4, 128.1, 126.9, 126.3, 123.5, 123.1, 121.2, 121.1, 117.6, 116.5, 116.0, 110.7, 108.0, 99.3, 61.3, 51.8, 14.2; IR (KBr) ν: 3409, 3381, 3061, 2979, 2953, 1723, 1680, 1603, 1578, 1509, 1452, 1435, 1373, 1339, 1322, 1288, 1218, 1099, 1056, 975, 943, 884, 856, 825 cm<sup>-1</sup>; HRMS (ESI) Calcd. for C<sub>29</sub>H<sub>22</sub>ClN<sub>3</sub>O<sub>4</sub>S ([M+Na]<sup>+</sup>): 566.0912, Found: 566.0906.

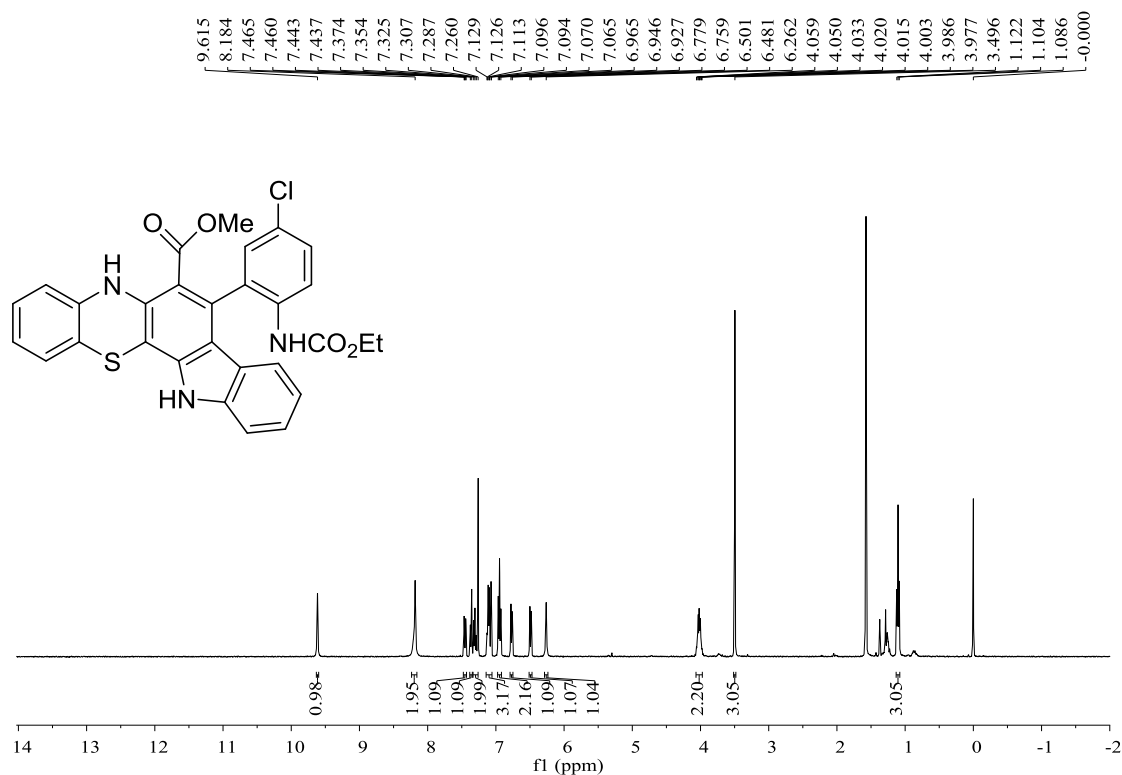

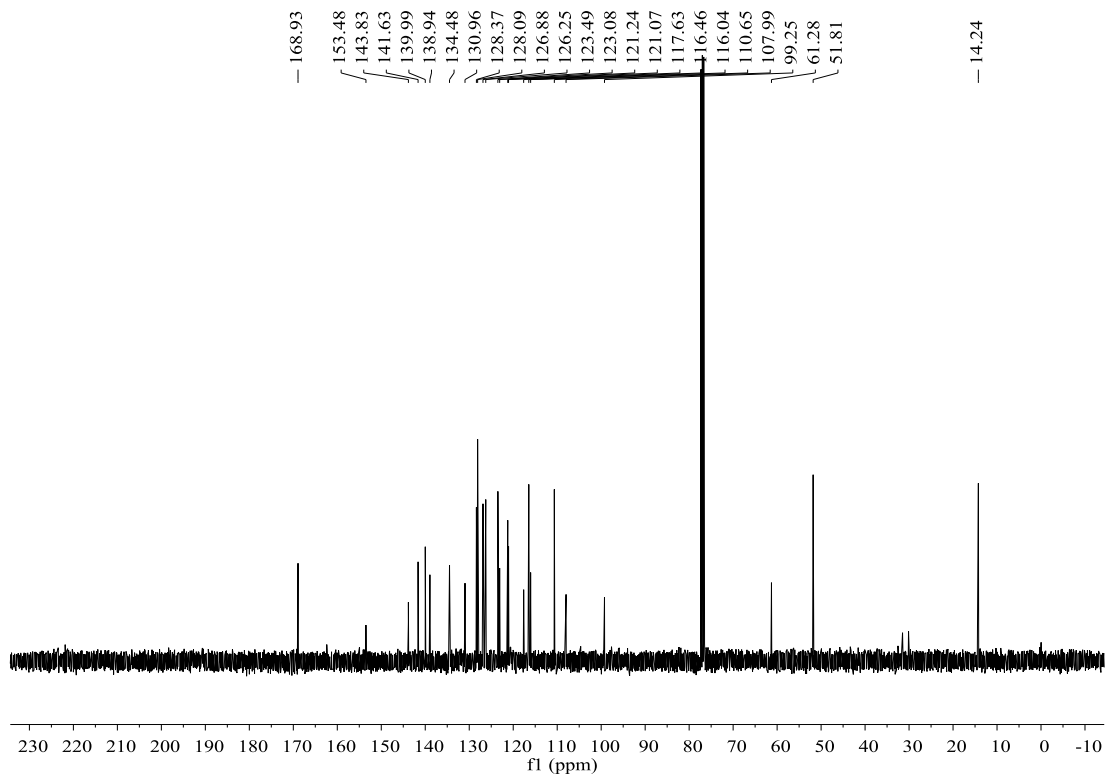

ph15 #84 RT: 1.07 AV: 1 NL: 5.89E+004  
 566.0906  
 [ETMS+ (566.1000-1500.0000)]  
 564.3333 (99.9999) 567.3075

**Methyl 7-(2-((ethoxycarbonyl)amino)-5-fluorophenyl)-5,12-dihydroindolo[3,2-c]phenothiazine-6-carboxylate (5d):** yellow solid, 52%, m.p. 190 – 192°C; <sup>1</sup>H NMR (400 MHz, CDCl<sub>3</sub>) δ: 9.57 (s, 1H, NH), 8.21 (s, 1H, NH), 8.16 ~ 8.15 (m, 1H, NH), 7.31 ~ 7.26 (m, 2H, ArH), 7.21 ~ 7.16 (m, 1H, ArH), 7.11 ~ 7.07 (m, 2H, ArH), 6.93 (t, *J* = 7.6 Hz, 1H, ArH), 6.83 ~ 6.80 (m, 1H, ArH), 6.74 (d, *J* = 7.6 Hz, 1H, ArH), 6.48 (d, *J* = 8.0 Hz, 1H, ArH), 6.22 (s, 1H, ArH), 4.04 ~ 3.99 (m, 2H, CH), 3.49 (s, 3H, OCH<sub>3</sub>), 1.11 ~ 1.08 (m, 3H, CH<sub>3</sub>); <sup>13</sup>C NMR (101 MHz, CDCl<sub>3</sub>) δ: 169.0, 158.8 (d, *J* = 245.4 Hz), 153.8, 143.7, 141.6, 140.0, 138.9, 131.8 (d, *J* = 2.0 Hz), 131.3, 128.1, 126.8, 126.2, 123.4, 123.1, 121.2, 121.0, 117.5, 116.4, 116.0, 115.2 (d, *J* = 23.2 Hz), 114.9 (d, *J* = 22.2 Hz), 110.7, 107.9, 99.1, 61.2, 51.8, 14.3; IR (KBr) ν: 3413, 3319, 3059, 2979, 2951, 1719, 1680, 1607, 1578, 1529, 1487, 1454, 1383, 1340, 1287, 1227, 1105, 1062, 978, 879, 852, 821, 798 cm<sup>-1</sup>; HRMS (ESI) Calcd. for C<sub>29</sub>H<sub>22</sub>FN<sub>3</sub>O<sub>4</sub>S ([M+Na]<sup>+</sup>): 550.1207, Found: 550.1201.

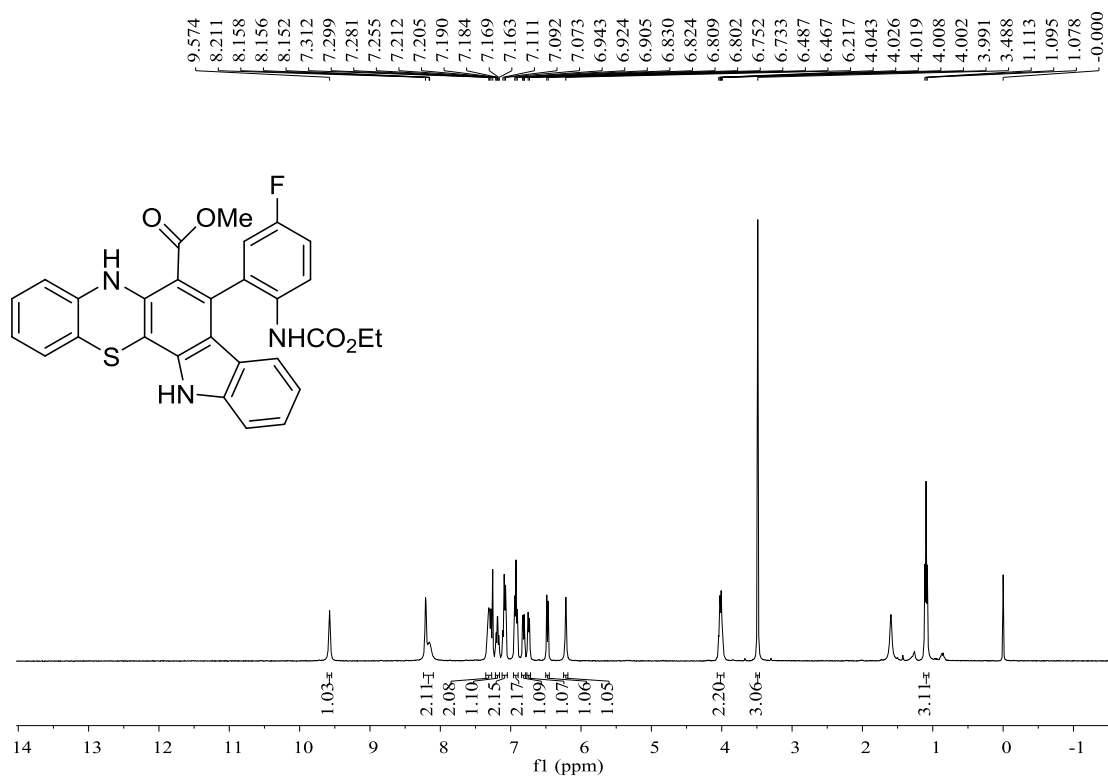

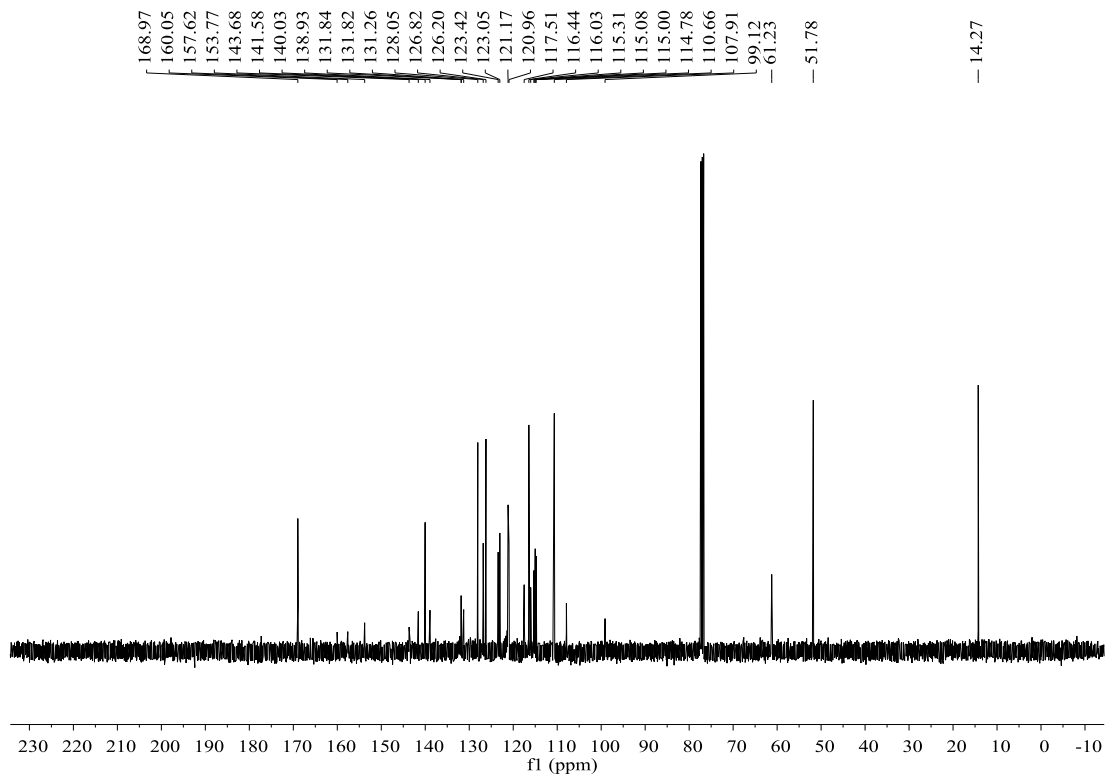

pH16 #68 RT: 0.86 AV: 1 NL: 3.04E+005  
 550.1204  
 FTMS: 1.57E+008 [100.0000-1500.0000]  
 0.04487013916 0.02633933

**Ethyl 7-(2-((ethoxycarbonyl)amino)-5-methylphenyl)-5,12-dihydroindolo[3,2-c]phenothiazine-6-carboxylate (5e)**: yellow oil, 40%, m.p.;  $^1\text{H NMR}$  (400 MHz,  $\text{CDCl}_3$ )  $\delta$ : 9.56 (s, 1H, NH), 8.24 (s, 1H, NH), 8.07 (s, 1H, NH), 7.29 ~ 7.27 (m, 2H, ArH), 7.25 ~ 7.22 (m, 1H, ArH), 7.10 ~ 7.06 (m, 2H, ArH), 6.93 ~ 6.86 (m, 3H, ArH), 6.73 (d,  $J = 8.4$  Hz, 1H, ArH), 6.47 (d,  $J = 8.4$  Hz, 1H, ArH), 6.29 (s, 1H, ArH), 4.03 ~ 3.96 (m, 4H, CH), 2.30 (s, 3H,  $\text{CH}_3$ ), 1.11 ~ 1.07 (m, 3H,  $\text{CH}_3$ ), 0.81 ~ 0.78 (m, 3H,  $\text{CH}_3$ );  $^{13}\text{C NMR}$  (101 MHz,  $\text{CDCl}_3$ )  $\delta$ : 169.0, 143.5, 141.8, 140.0, 138.8, 133.4, 132.9, 128.9, 128.8, 128.0, 126.8, 125.9, 123.4, 123.2, 121.4, 120.8, 117.8, 116.4, 116.2, 110.5, 108.6, 98.5, 61.0, 60.9, 20.7, 14.3, 13.1; IR (KBr)  $\nu$ : 3415, 3331, 2981, 2926, 1726, 1677, 1592, 1519, 1459, 1378, 1328, 1291, 1222, 1118, 1060, 831  $\text{cm}^{-1}$ ; HRMS (ESI) Calcd. for  $\text{C}_{31}\text{H}_{27}\text{N}_3\text{O}_4\text{S}$  ( $[\text{M}+\text{H}]^+$ ): 560.1614, Found: 560.1609.

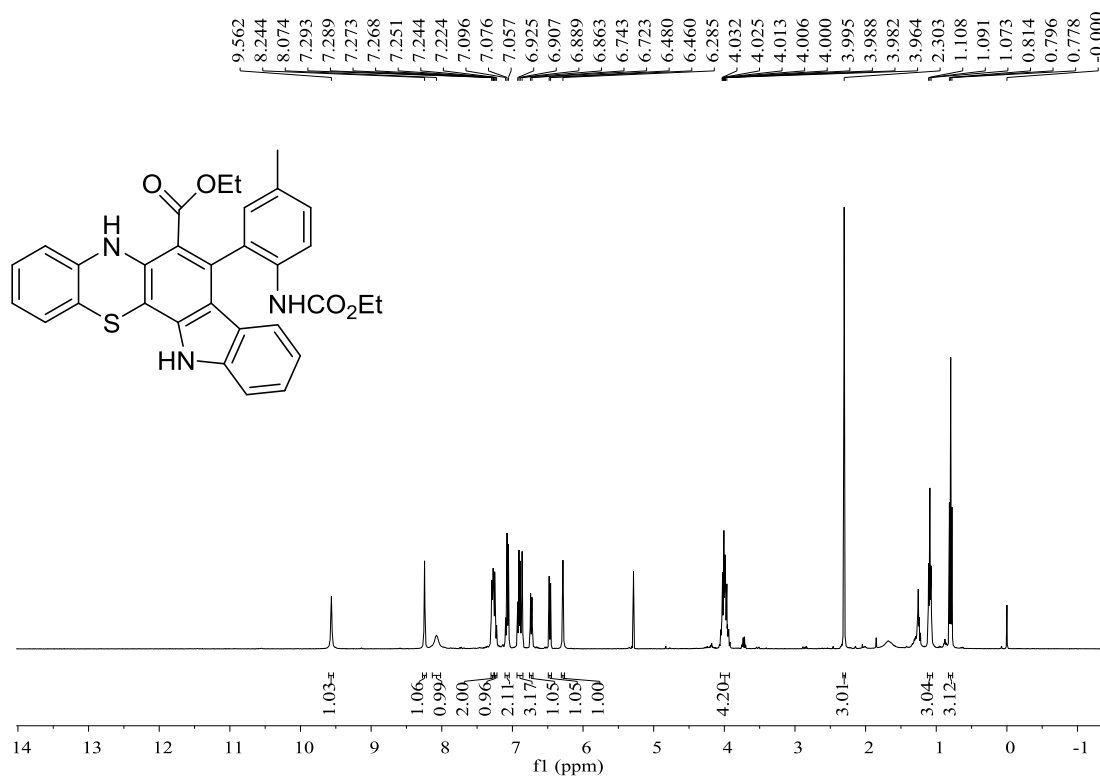



**Ethyl 7-(5-chloro-2-((ethoxycarbonyl)amino)phenyl)-5,12-dihydroindolo[3,2-c]phenothiazine-6-carboxylate (5f):** yellow solid, 45%, m.p. 209 – 211°C; <sup>1</sup>H NMR (400 MHz, CDCl<sub>3</sub>) δ: 9.75 (s, 1H, NH), 8.19 (s, 2H, [NH]2), 7.46 (d, *J* = 8.8 Hz, 1H, ArH), 7.34 ~ 7.27 (m, 2H, ArH), 7.11 ~ 7.08 (m, 3H, ArH), 6.95 ~ 6.92 (m, 2H, ArH), 6.75 (d, *J* = 7.6 Hz, 1H, ArH), 6.47 (d, *J* = 8.0 Hz, 1H, ArH), 6.30 (s, 1H, ArH), 4.08 ~ 3.95 (m, 4H, CH), 1.12 ~ 1.09 (m, 3H, CH<sub>3</sub>), 0.86 ~ 0.83 (m, 3H, CH<sub>3</sub>); <sup>13</sup>C NMR (101 MHz, CDCl<sub>3</sub>) δ: 168.6, 153.5, 144.0, 141.7, 140.0, 138.9, 134.7, 130.9, 128.3, 128.1, 126.8, 126.2, 123.4, 123.1, 121.2, 121.0, 117.6, 116.5, 116.0, 110.7, 107.9, 99.2, 61.3, 61.1, 14.3, 13.2; IR (KBr) ν: 3409, 3300, 3061, 2978, 1716, 1676, 1605, 1577, 1515, 1452, 1378, 1330, 1288, 1219, 1096, 1055, 1013, 946, 859, 812 cm<sup>-1</sup>; HRMS (ESI) Calcd. for C<sub>30</sub>H<sub>24</sub>ClN<sub>3</sub>O<sub>4</sub>S ([M+Na]<sup>+</sup>): 580.1068, Found: 580.1063.

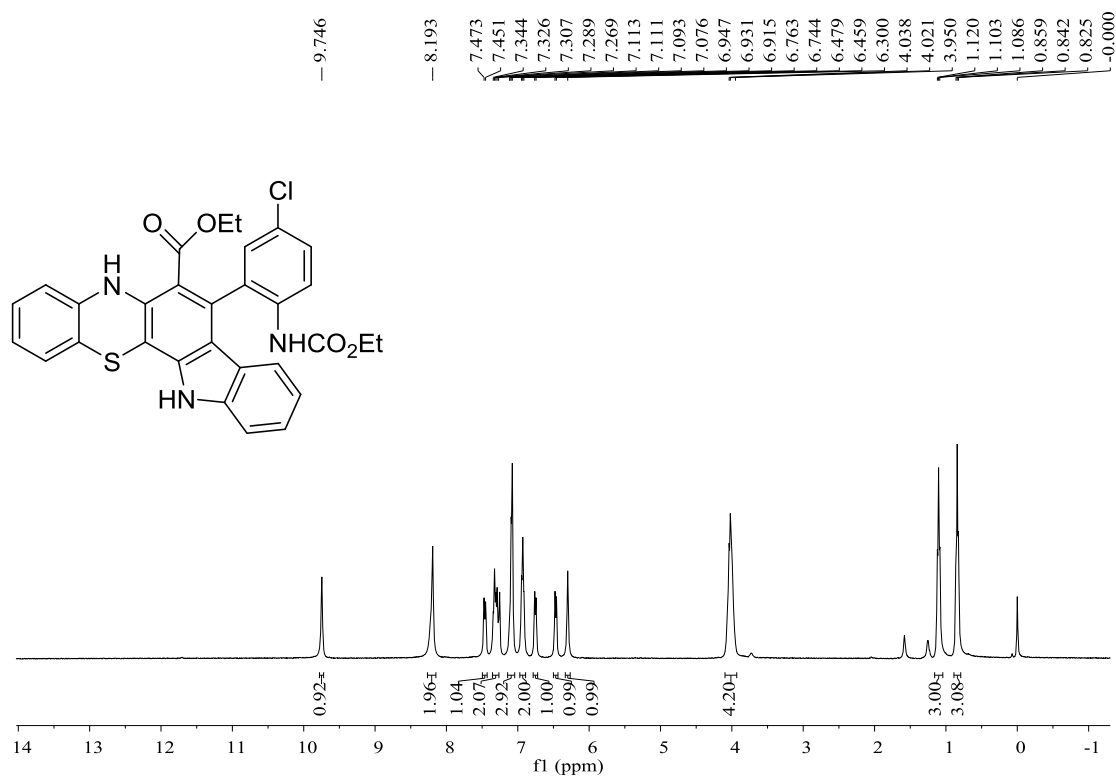





**Ethyl 7-(2-((ethoxycarbonyl)amino)-5-fluorophenyl)-5,12-dihydroindolo[3,2-c]phenothiazine-6-carboxylate (5g)**: yellow oil, 38%, m.p.;  $^1\text{H NMR}$  (400 MHz,  $\text{CDCl}_3$ )  $\delta$ : 9.71 (s, 1H, NH), 8.30 (s, 1H, NH), 8.18 (s, 1H, NH), 7.30 ~ 7.27 (m, 2H, ArH), 7.22 ~ 7.18 (m, 1H, ArH), 7.10 ~ 7.07 (m, 2H, ArH), 6.93 ~ 6.90 (m, 2H, ArH), 6.83 (d,  $J = 8.0$  Hz, 1H, ArH), 6.74 (d,  $J = 7.6$  Hz, 1H, ArH), 6.45 (d,  $J = 7.6$  Hz, 1H, ArH), 6.26 (s, 1H, ArH), 4.01 (m, 4H, CH), 1.11 ~ 1.08 (m, 3H,  $\text{CH}_3$ ), 0.86 ~ 0.83 (m, 3H,  $\text{CH}_3$ );  $^{13}\text{C NMR}$  (101 MHz,  $\text{CDCl}_3$ )  $\delta$ : 168.6, 158.9(d,  $J = 243.4$  Hz), 153.78, 143.7, 141.59, 140.17, 138.9, 132.1 (d,  $J = 2.0$  Hz), 131.17, 128.0, 126.75, 126.1, 123.3, 123.0, 121.1, 120.85, 117.5, 116.4, 116.1, 115.4 (d,  $J = 23.2$  Hz), 114.8 (d,  $J = 21.1$  Hz), 110.7, 107.8, 99.1, 61.3, 61.1, 14.3, 13.2; IR (KBr)  $\nu$ : 3446, 3334, 3076, 2989, 1702, 1684, 1601, 1569, 1513, 1459, 1373, 1336, 1292, 1231, 1107, 1053, 1015, 949, 862, 808  $\text{cm}^{-1}$ ; HRMS (ESI) Calcd. for  $\text{C}_{30}\text{H}_{24}\text{FN}_3\text{O}_4\text{S}$  ( $[\text{M}+\text{Na}]^+$ ): 564.1364, Found: 564.1359.

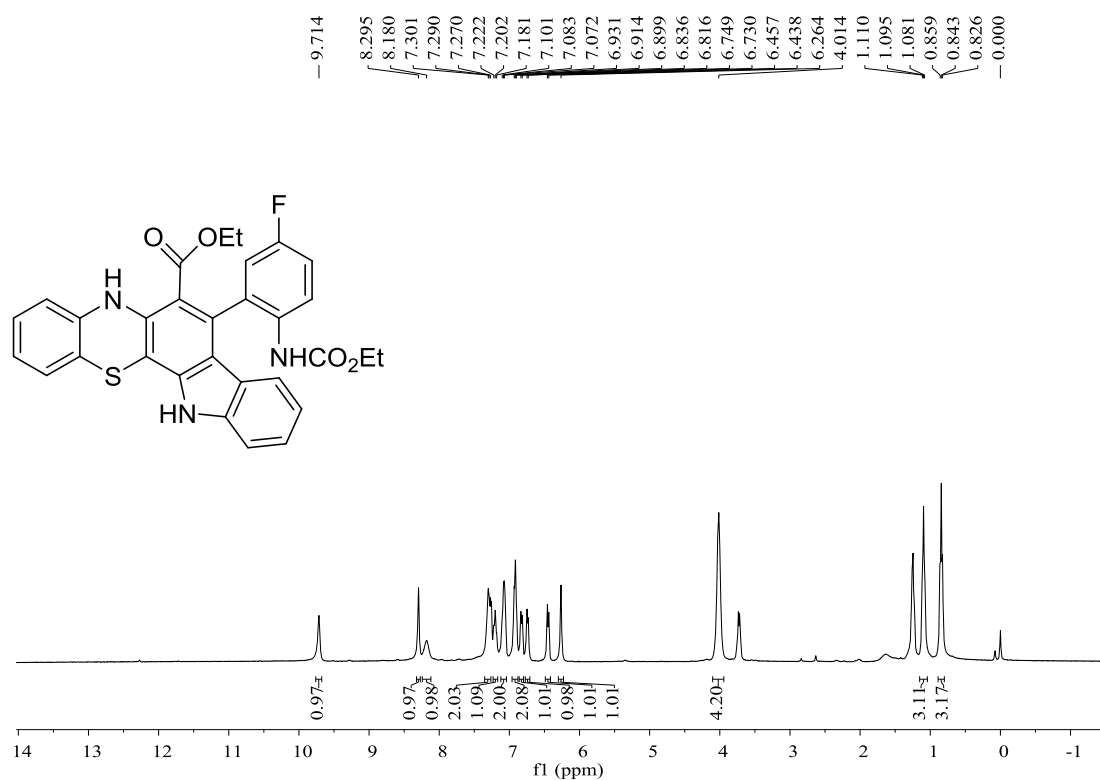

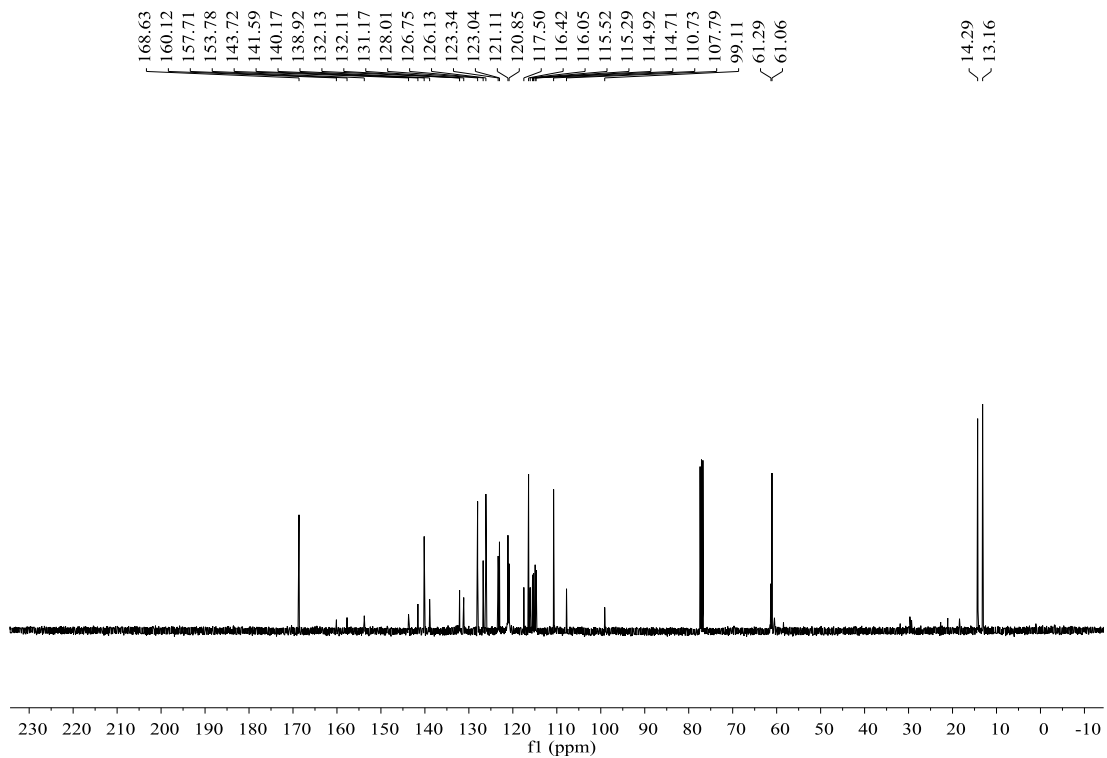

ph19 #01 RT: 0.77 AV: 1 NL: 3.13E+005  
564.1359  
FTMS + 0.77453306 (100.0000-1500.0000)

**Methyl 7-(2-((methoxycarbonyl)amino)phenyl)-5,12-dihydroindolo[3,2-c]phenothiazine-6-carboxylate (5h):** yellow solid, 49%, m.p. 121 – 123°C; <sup>1</sup>H NMR (400 MHz, CDCl<sub>3</sub>) δ: 9.49 (s, 1H, NH), 8.20 (s, 2H, [NH]2), 7.50 ~ 7.46 (m, 1H, ArH), 7.34 (d, *J* = 8.0 Hz, 1H, ArH), 7.29 ~ 7.26 (m, 1H, ArH), 7.18 ~ 7.15 (m, 1H, ArH), 7.11 ~ 7.04 (m, 3H, ArH), 6.95~ 6.87 (m, 2H, ArH), 6.75 (d, *J* = 8.0 Hz, 1H, ArH), 6.42 (d, *J* = 8.0 Hz, 1H, ArH), 6.35 (s, 1H, ArH), 3.56 (m, 3H, OCH<sub>3</sub>), 3.44 (m, 3H, OCH<sub>3</sub>); <sup>13</sup>C NMR (101 MHz, CDCl<sub>3</sub>) δ: 169.3, 154.0, 143.5, 141.7, 140.0, 138.9, 135.5, 132.5, 128.6, 128.3, 128.0, 126.8, 126.0, 123.6, 123.3, 123.3, 121.3, 120.8, 117.8, 116.4, 116.2, 110.6, 108.4, 98.8, 52.1, 51.7; IR (KBr) ν: 3372, 3274, 3057, 2950, 1732, 1666, 1603, 1579, 1520, 1491, 1452, 1382, 1341, 1287, 1222, 1111, 1062, 974, 879, 849, 802 cm<sup>-1</sup>; HRMS (ESI) Calcd. for C<sub>28</sub>H<sub>21</sub>N<sub>3</sub>O<sub>4</sub>S ([M+Na]<sup>+</sup>): 518.1145, Found: 518.1136.

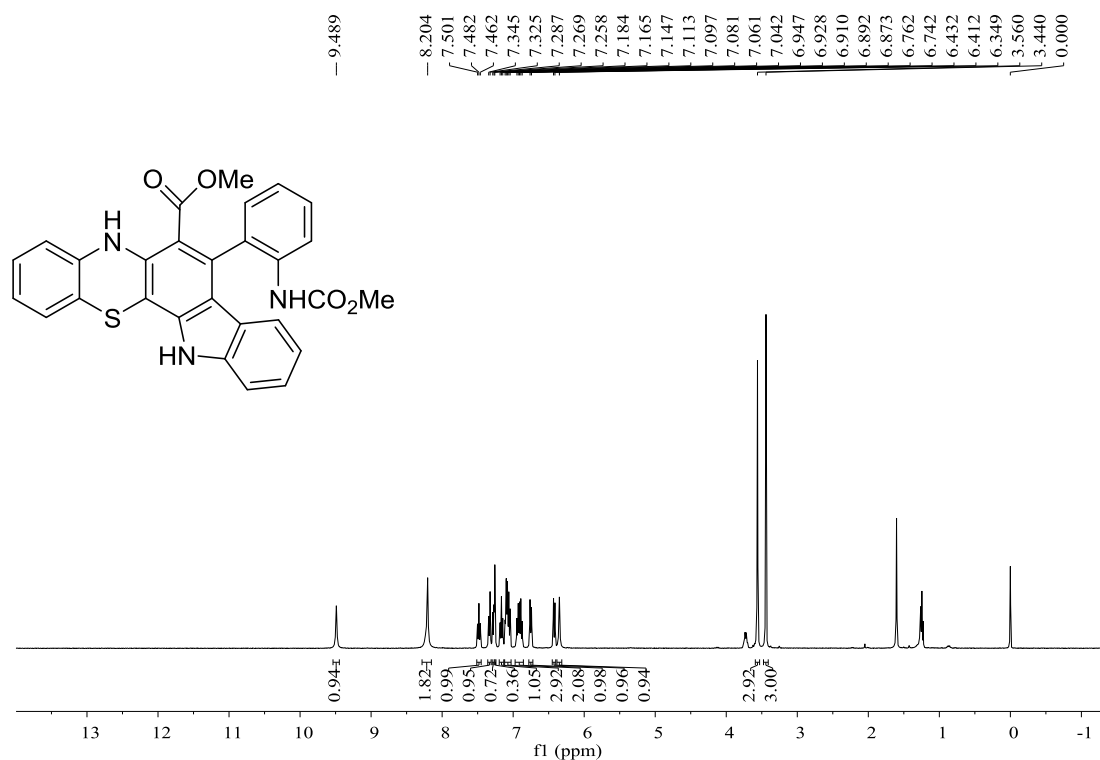

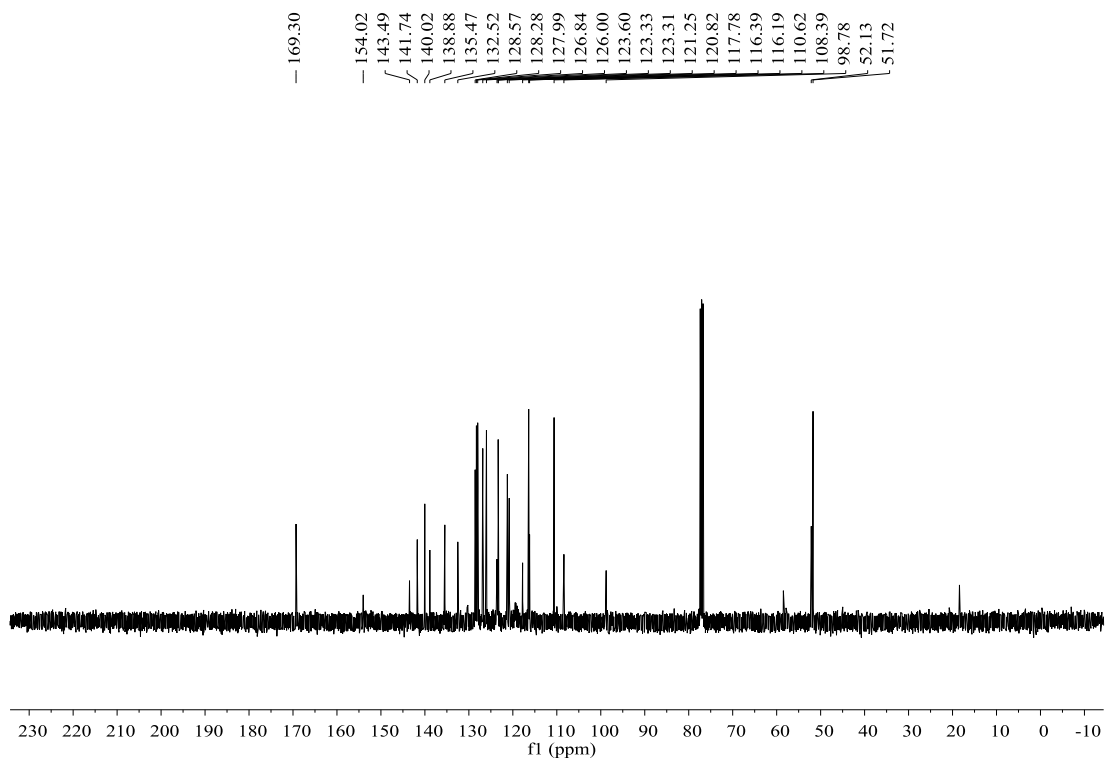

pH20 #64 RT: 0.81 AV: 1 NL: 3.02E+005  
 1 518.1136  
 1 ETMS 3.01580466 [100.0000-1500.0000]  
 5 0.00000000 [0.00000000-2.00000000]

**Methyl 7-(5-chloro-2-((methoxycarbonyl)amino)phenyl)-5,12-dihydroindolo[3,2-c]phenothiazine-6-carboxylate (5i)**: yellow solid, 53%, m.p. 171 – 173°C; <sup>1</sup>H NMR (400 MHz, CDCl<sub>3</sub>) δ: 9.60 (s, 1H, NH), 8.19 (s, 2H, [NH]2), 7.47 ~ 7.44 (m, 1H, ArH), 7.35 (d, *J* = 8.0 Hz, 1H, ArH), 7.32 ~ 7.28 (m, 1H, ArH), 7.12 ~ 7.07 (m, 3H, ArH), 6.96 ~ 6.92 (m, 2H, ArH), 6.76 (d, *J* = 7.2 Hz, 1H, ArH), 6.48 (d, *J* = 8.0 Hz, 1H, ArH), 6.32 (s, 1H, ArH), 3.56 (m, 3H, OCH<sub>3</sub>), 3.49 (m, 3H, OCH<sub>3</sub>); <sup>13</sup>C NMR (101 MHz, CDCl<sub>3</sub>) δ: 168.9, 153.9, 143.8, 141.6, 140.1, 138.9, 134.4, 130.8, 128.4, 128.1, 126.9, 126.3, 123.5, 123.0, 121.2, 121.1, 117.6, 116.5, 116.0, 110.7, 110.0, 107.9, 99.3, 52.3, 51.9; IR (KBr) ν: 3403, 3291, 3060, 2950, 1717, 1675, 1605, 1576, 1515, 1449, 1379, 1342, 1288, 1218, 1098, 1059, 976, 883, 855, 818 cm<sup>-1</sup>; HRMS (ESI) Calcd. for C<sub>28</sub>H<sub>20</sub>ClN<sub>3</sub>O<sub>4</sub>S ([M+H]<sup>+</sup>): 552.0755, Found: 552.0750.

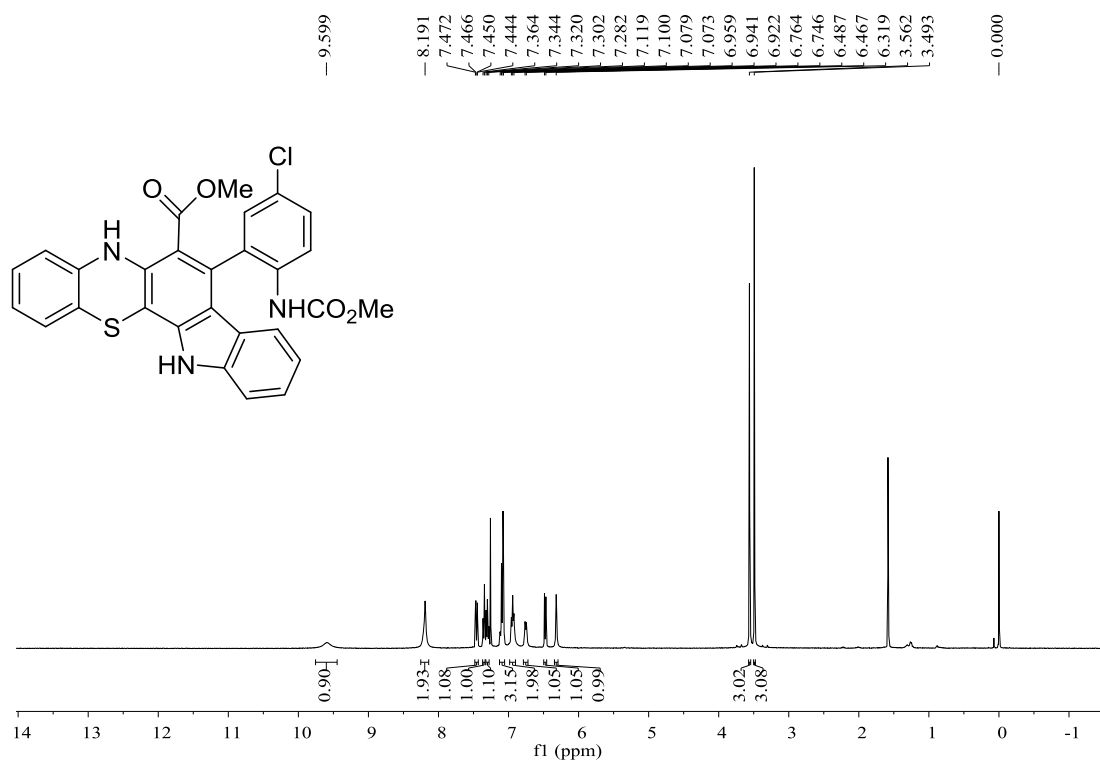

Supplement: d1nj00947h1.pdf [file d1nj00947h1.pdf]
